# Supplementary material for: Diabetes medication regimens and patient clinical characteristics in the national patient‐centered clinical research network, PCORnet
Source: PubMed Central journal article supplement — Pharmacol Res Perspect. 2020 Sep 2;8(5):e00637. doi: 10.1002/prp2.637 (PMC7507366; doi:10.1002/prp2.637), 2020-09-02
Supplement: PRP2-8-e00637-s001.pdf [file PRP2-8-e00637-s001.pdf]

Supplemental Table 1. Type 2 Diabetes Agents and Pharmacologic Classes

| Broader Drug Class   | Concept ID | Class Type          | Trade or Brand Name                   | RX CUI Code | Start Date of Valid Code | End Date of Valid Code |
|----------------------|------------|---------------------|---------------------------------------|-------------|--------------------------|------------------------|
| ALPHA_GLUC_INHIBITOR | 19067199   | Brand Name          | Glyset                                | 217372      | 19700101                 | 20991231               |
| ALPHA_GLUC_INHIBITOR | 19021785   | Brand Name          | Precose                               | 151826      | 19700101                 | 20991231               |
| ALPHA_GLUC_INHIBITOR | 36233498   | Branded Dose Group  | Glyset Oral Product                   | 1171936     | 20160801                 | 20991231               |
| ALPHA_GLUC_INHIBITOR | 36233499   | Branded Dose Group  | Glyset Pill                           | 1171937     | 20160801                 | 20991231               |
| ALPHA_GLUC_INHIBITOR | 36242198   | Branded Dose Group  | Precose Oral Product                  | 1185237     | 20160801                 | 20991231               |
| ALPHA_GLUC_INHIBITOR | 36242199   | Branded Dose Group  | Precose Pill                          | 1185238     | 20160801                 | 20991231               |
| ALPHA_GLUC_INHIBITOR | 19040970   | Branded Drug        | Acarbose 100 MG Oral Tablet [Precose] | 209248      | 19700101                 | 20991231               |
| ALPHA_GLUC_INHIBITOR | 19047612   | Branded Drug        | Acarbose 25 MG Oral Tablet [Precose]  | 213170      | 19700101                 | 20991231               |
| ALPHA_GLUC_INHIBITOR | 19040969   | Branded Drug        | Acarbose 50 MG Oral Tablet [Precose]  | 209247      | 19700101                 | 20991231               |
| ALPHA_GLUC_INHIBITOR | 1510208    | Branded Drug        | miglitol 100 MG Oral Tablet [Glyset]  | 213487      | 19700101                 | 20991231               |
| ALPHA_GLUC_INHIBITOR | 1510206    | Branded Drug        | miglitol 25 MG Oral Tablet [Glyset]   | 213485      | 19700101                 | 20991231               |
| ALPHA_GLUC_INHIBITOR | 1510207    | Branded Drug        | miglitol 50 MG Oral Tablet [Glyset]   | 213486      | 19700101                 | 20991231               |
| ALPHA_GLUC_INHIBITOR | 19021787   | Branded Drug Comp   | Acarbose 100 MG [Precose]             | 569872      | 20050911                 | 20991231               |
| ALPHA_GLUC_INHIBITOR | 19120257   | Branded Drug Comp   | Acarbose 25 MG [Precose]              | 573095      | 20050911                 | 20991231               |
| ALPHA_GLUC_INHIBITOR | 19021786   | Branded Drug Comp   | Acarbose 50 MG [Precose]              | 569871      | 20050911                 | 20991231               |
| ALPHA_GLUC_INHIBITOR | 19067232   | Branded Drug Comp   | miglitol 100 MG [Glyset]              | 573375      | 20050911                 | 20991231               |
| ALPHA_GLUC_INHIBITOR | 19067200   | Branded Drug Comp   | miglitol 25 MG [Glyset]               | 573373      | 20050911                 | 20991231               |
| ALPHA_GLUC_INHIBITOR | 19067231   | Branded Drug Comp   | miglitol 50 MG [Glyset]               | 573374      | 20050911                 | 20991231               |
| ALPHA_GLUC_INHIBITOR | 40003413   | Branded Drug Form   | Acarbose Oral Tablet [Precose]        | 368300      | 19700101                 | 20991231               |
| ALPHA_GLUC_INHIBITOR | 40056706   | Branded Drug Form   | miglitol Oral Tablet [Glyset]         | 368246      | 19700101                 | 20991231               |
| ALPHA_GLUC_INHIBITOR | 36216897   | Clinical Dose Group | Acarbose Oral Product                 | 1153649     | 20160801                 | 20991231               |
| ALPHA_GLUC_INHIBITOR | 36216898   | Clinical Dose Group | Acarbose Pill                         | 1153650     | 20160801                 | 20991231               |
| ALPHA_GLUC_INHIBITOR | 36215710   | Clinical Dose Group | miglitol Oral Product                 | 1157268     | 20160801                 | 20991231               |
| ALPHA_GLUC_INHIBITOR | 36215711   | Clinical Dose Group | miglitol Pill                         | 1157269     | 20160801                 | 20991231               |
| ALPHA_GLUC_INHIBITOR | 19021312   | Clinical Drug       | Acarbose 100 MG Oral Tablet           | 199150      | 19700101                 | 20991231               |
| ALPHA_GLUC_INHIBITOR | 19023063   | Clinical Drug       | Acarbose 25 MG Oral Tablet            | 200132      | 19700101                 | 20991231               |
| ALPHA_GLUC_INHIBITOR | 1529352    | Clinical Drug       | Acarbose 50 MG Oral Tablet            | 199149      | 19700101                 | 20991231               |
| ALPHA_GLUC_INHIBITOR | 19029061   | Clinical Drug       | miglitol 100 MG Oral Tablet           | 205331      | 19700101                 | 20991231               |
| ALPHA_GLUC_INHIBITOR | 19029029   | Clinical Drug       | miglitol 25 MG Oral Tablet            | 205329      | 19700101                 | 20991231               |
| ALPHA_GLUC_INHIBITOR | 19029030   | Clinical Drug       | miglitol 50 MG Oral Tablet            | 205330      | 19700101                 | 20991231               |
| ALPHA_GLUC_INHIBITOR | 1529358    | Clinical Drug Comp  | Acarbose 100 MG                       | 315246      | 19700101                 | 20991231               |
| ALPHA_GLUC_INHIBITOR | 1529359    | Clinical Drug Comp  | Acarbose 25 MG                        | 315247      | 19700101                 | 20991231               |
| ALPHA_GLUC_INHIBITOR | 1529360    | Clinical Drug Comp  | Acarbose 50 MG                        | 315248      | 19700101                 | 20991231               |
| ALPHA_GLUC_INHIBITOR | 19081704   | Clinical Drug Comp  | miglitol 100 MG                       | 316304      | 19700101                 | 20991231               |
| ALPHA_GLUC_INHIBITOR | 19081705   | Clinical Drug Comp  | miglitol 25 MG                        | 316305      | 19700101                 | 20991231               |
| ALPHA_GLUC_INHIBITOR | 19081706   | Clinical Drug Comp  | miglitol 50 MG                        | 316306      | 19700101                 | 20991231               |
| ALPHA_GLUC_INHIBITOR | 40003412   | Clinical Drug Form  | Acarbose Oral Tablet                  | 370504      | 19700101                 | 20991231               |
| ALPHA_GLUC_INHIBITOR | 40056705   | Clinical Drug Form  | miglitol Oral Tablet                  | 372926      | 19700101                 | 20991231               |
| ALPHA_GLUC_INHIBITOR | 1529331    | Ingredient          | Acarbose                              | 16681       | 19700101                 | 20991231               |

| <b>Broader Drug Class</b> | <b>Concept ID</b> | <b>Class Type</b>   | <b>Trade or Brand Name</b>               | <b>RX CUI Code</b> | <b>Start Date of Valid Code</b> | <b>End Date of Valid Code</b> |
|---------------------------|-------------------|---------------------|------------------------------------------|--------------------|---------------------------------|-------------------------------|
| ALPHA_GLUC_INHIBITOR      | 1510202           | Ingredient          | miglitol                                 | 30009              | 19700101                        | 20991231                      |
| DPP4_ALOG_V2              | 43013741          | Brand Name          | Nesina                                   | 1368007            | 20130304                        | 20991231                      |
| DPP4_ALOG_V2              | 36246195          | Branded Dose Group  | Nesina Oral Product                      | 1368010            | 20160801                        | 20991231                      |
| DPP4_ALOG_V2              | 36246196          | Branded Dose Group  | Nesina Pill                              | 1368011            | 20160801                        | 20991231                      |
| DPP4_ALOG_V2              | 43013912          | Branded Drug        | alogliptin 12.5 MG Oral Tablet [Nesina]  | 1368036            | 20130304                        | 20991231                      |
| DPP4_ALOG_V2              | 43013925          | Branded Drug        | alogliptin 25 MG Oral Tablet [Nesina]    | 1368012            | 20130304                        | 20991231                      |
| DPP4_ALOG_V2              | 43013929          | Branded Drug        | alogliptin 6.25 MG Oral Tablet [Nesina]  | 1368020            | 20130304                        | 20991231                      |
| DPP4_ALOG_V2              | 43013913          | Branded Drug Comp   | alogliptin 12.5 MG [Nesina]              | 1368035            | 20130304                        | 20991231                      |
| DPP4_ALOG_V2              | 43013926          | Branded Drug Comp   | alogliptin 25 MG [Nesina]                | 1368008            | 20130304                        | 20991231                      |
| DPP4_ALOG_V2              | 43013930          | Branded Drug Comp   | alogliptin 6.25 MG [Nesina]              | 1368019            | 20130304                        | 20991231                      |
| DPP4_ALOG_V2              | 43013932          | Branded Drug Form   | alogliptin Oral Tablet [Nesina]          | 1368009            | 20130304                        | 20991231                      |
| DPP4_ALOG_V2              | 36246193          | Clinical Dose Group | alogliptin Oral Product                  | 1368003            | 20160801                        | 20991231                      |
| DPP4_ALOG_V2              | 36246194          | Clinical Dose Group | alogliptin Pill                          | 1368004            | 20160801                        | 20991231                      |
| DPP4_ALOG_V2              | 43013911          | Clinical Drug       | alogliptin 12.5 MG Oral Tablet           | 1368034            | 20130304                        | 20991231                      |
| DPP4_ALOG_V2              | 43013924          | Clinical Drug       | alogliptin 25 MG Oral Tablet             | 1368006            | 20130304                        | 20991231                      |
| DPP4_ALOG_V2              | 43013928          | Clinical Drug       | alogliptin 6.25 MG Oral Tablet           | 1368018            | 20130304                        | 20991231                      |
| DPP4_ALOG_V2              | 43013895          | Clinical Drug Comp  | alogliptin 12.5 MG                       | 1368033            | 20130304                        | 20991231                      |
| DPP4_ALOG_V2              | 43013914          | Clinical Drug Comp  | alogliptin 25 MG                         | 1368002            | 20130304                        | 20991231                      |
| DPP4_ALOG_V2              | 43013927          | Clinical Drug Comp  | alogliptin 6.25 MG                       | 1368017            | 20130304                        | 20991231                      |
| DPP4_ALOG_V2              | 43013931          | Clinical Drug Form  | alogliptin Oral Tablet                   | 1368005            | 20130304                        | 20991231                      |
| DPP4_ALOG_V2              | 43013884          | Ingredient          | alogliptin                               | 1368001            | 20130304                        | 20991231                      |
| DPP4_ALOG_V2              | 46274508          | Precise Ingredient  | alogliptin benzoate                      | 1368000            | 20150908                        | 20991231                      |
| DPP4_LINA_V2              | 40239051          | Brand Name          | Tradjenta                                | 1100703            | 20110605                        | 20991231                      |
| DPP4_LINA_V2              | 36229565          | Branded Dose Group  | Tradjenta Oral Product                   | 1179163            | 20160801                        | 20991231                      |
| DPP4_LINA_V2              | 36229566          | Branded Dose Group  | Tradjenta Pill                           | 1179164            | 20160801                        | 20991231                      |
| DPP4_LINA_V2              | 40239219          | Branded Drug        | Linagliptin 5 MG Oral Tablet [Tradjenta] | 1100706            | 20110605                        | 20991231                      |
| DPP4_LINA_V2              | 40239220          | Branded Drug Comp   | Linagliptin 5 MG [Tradjenta]             | 1100704            | 20110605                        | 20991231                      |
| DPP4_LINA_V2              | 40239222          | Branded Drug Form   | Linagliptin Oral Tablet [Tradjenta]      | 1100705            | 20110605                        | 20991231                      |
| DPP4_LINA_V2              | 36221103          | Clinical Dose Group | Linagliptin Oral Product                 | 1164670            | 20160801                        | 20991231                      |
| DPP4_LINA_V2              | 36221104          | Clinical Dose Group | Linagliptin Pill                         | 1164671            | 20160801                        | 20991231                      |
| DPP4_LINA_V2              | 40239218          | Clinical Drug       | Linagliptin 5 MG Oral Tablet             | 1100702            | 20110605                        | 20991231                      |
| DPP4_LINA_V2              | 42705856          | Clinical Drug Comp  | Linagliptin 2.5 MG                       | 1243015            | 20120507                        | 20991231                      |
| DPP4_LINA_V2              | 40239217          | Clinical Drug Comp  | Linagliptin 5 MG                         | 1100700            | 20110605                        | 20991231                      |
| DPP4_LINA_V2              | 40239221          | Clinical Drug Form  | Linagliptin Oral Tablet                  | 1100701            | 20110605                        | 20991231                      |
| DPP4_LINA_V2              | 40239216          | Ingredient          | Linagliptin                              | 1100699            | 20110605                        | 20991231                      |
| DPP4_SAXA_V2              | 40165127          | Brand Name          | Onglyza                                  | 858037             | 20090906                        | 20991231                      |
| DPP4_SAXA_V2              | 36229291          | Branded Dose Group  | Onglyza Oral Product                     | 1181729            | 20160801                        | 20991231                      |
| DPP4_SAXA_V2              | 36229292          | Branded Dose Group  | Onglyza Pill                             | 1181730            | 20160801                        | 20991231                      |
| DPP4_SAXA_V2              | 40166038          | Branded Drug        | saxagliptin 2.5 MG Oral Tablet [Onglyza] | 858044             | 20090906                        | 20991231                      |

| <b>Broader Drug Class</b> | <b>Concept ID</b> | <b>Class Type</b>   | <b>Trade or Brand Name</b>                                    | <b>RX CUI Code</b> | <b>Start Date of Valid Code</b> | <b>End Date of Valid Code</b> |
|---------------------------|-------------------|---------------------|---------------------------------------------------------------|--------------------|---------------------------------|-------------------------------|
| DPP4_SAXA_V2              | 40166042          | Branded Drug        | saxagliptin 5 MG Oral Tablet [Onglyza]                        | 858040             | 20090906                        | 20991231                      |
| DPP4_SAXA_V2              | 40166039          | Branded Drug Comp   | saxagliptin 2.5 MG [Onglyza]                                  | 858043             | 20090906                        | 20991231                      |
| DPP4_SAXA_V2              | 40166043          | Branded Drug Comp   | saxagliptin 5 MG [Onglyza]                                    | 858038             | 20090906                        | 20991231                      |
| DPP4_SAXA_V2              | 40166045          | Branded Drug Form   | saxagliptin Oral Tablet [Onglyza]                             | 858039             | 20090906                        | 20991231                      |
| DPP4_SAXA_V2              | 36224108          | Clinical Dose Group | saxagliptin Oral Product                                      | 1158518            | 20160801                        | 20991231                      |
| DPP4_SAXA_V2              | 36224321          | Clinical Dose Group | saxagliptin Pill                                              | 1158519            | 20160801                        | 20991231                      |
| DPP4_SAXA_V2              | 40166037          | Clinical Drug       | saxagliptin 2.5 MG Oral Tablet                                | 858042             | 20090906                        | 20991231                      |
| DPP4_SAXA_V2              | 40166041          | Clinical Drug       | saxagliptin 5 MG Oral Tablet                                  | 858036             | 20090906                        | 20991231                      |
| DPP4_SAXA_V2              | 40166036          | Clinical Drug Comp  | saxagliptin 2.5 MG                                            | 858041             | 20090906                        | 20991231                      |
| DPP4_SAXA_V2              | 40166040          | Clinical Drug Comp  | saxagliptin 5 MG                                              | 858034             | 20090906                        | 20991231                      |
| DPP4_SAXA_V2              | 40166044          | Clinical Drug Form  | saxagliptin Oral Tablet                                       | 858035             | 20090906                        | 20991231                      |
| DPP4_SAXA_V2              | 40166035          | Ingredient          | saxagliptin                                                   | 857974             | 20090906                        | 20991231                      |
| DPP4_SAXA_V2              | 46274924          | Precise Ingredient  | saxagliptin anhydrous                                         | 1546030            | 20150908                        | 20991231                      |
| DPP4_SAXA_V2              | 46274207          | Precise Ingredient  | saxagliptin hydrochloride                                     | 1043560            | 20150908                        | 20991231                      |
| DPP4_SITA_V2              | 19089883          | Brand Name          | Januvia                                                       | 638596             | 20061217                        | 20991231                      |
| DPP4_SITA_V2              | 36221232          | Branded Dose Group  | Januvia Oral Product                                          | 1167814            | 20160801                        | 20991231                      |
| DPP4_SITA_V2              | 36221233          | Branded Dose Group  | Januvia Pill                                                  | 1167815            | 20160801                        | 20991231                      |
| DPP4_SITA_V2              | 40243627          | Branded Drug        | Simvastatin 10 MG / sitagliptin 100 MG Oral Tablet [Juvisynd] | 1189818            | 20111106                        | 20991231                      |
| DPP4_SITA_V2              | 42901619          | Branded Drug        | Simvastatin 10 MG / sitagliptin 50 MG Oral Tablet [Juvisynd]  | 1312415            | 20121203                        | 20991231                      |
| DPP4_SITA_V2              | 40243630          | Branded Drug        | Simvastatin 20 MG / sitagliptin 100 MG Oral Tablet [Juvisynd] | 1189814            | 20111106                        | 20991231                      |
| DPP4_SITA_V2              | 42901621          | Branded Drug        | Simvastatin 20 MG / sitagliptin 50 MG Oral Tablet [Juvisynd]  | 1312422            | 20121203                        | 20991231                      |
| DPP4_SITA_V2              | 40243633          | Branded Drug        | Simvastatin 40 MG / sitagliptin 100 MG Oral Tablet [Juvisynd] | 1189827            | 20111106                        | 20991231                      |
| DPP4_SITA_V2              | 42901623          | Branded Drug        | Simvastatin 40 MG / sitagliptin 50 MG Oral Tablet [Juvisynd]  | 1312429            | 20121203                        | 20991231                      |
| DPP4_SITA_V2              | 19125043          | Branded Drug        | sitagliptin 100 MG Oral Tablet [Januvia]                      | 665036             | 20061217                        | 20991231                      |
| DPP4_SITA_V2              | 19125047          | Branded Drug        | sitagliptin 25 MG Oral Tablet [Januvia]                       | 665040             | 20061217                        | 20991231                      |
| DPP4_SITA_V2              | 19125051          | Branded Drug        | sitagliptin 50 MG Oral Tablet [Januvia]                       | 665044             | 20061217                        | 20991231                      |
| DPP4_SITA_V2              | 40243628          | Branded Drug Comp   | Simvastatin 10 MG / sitagliptin 100 MG [Juvisynd]             | 1189806            | 20111106                        | 20991231                      |
| DPP4_SITA_V2              | 42900896          | Branded Drug Comp   | Simvastatin 10 MG / sitagliptin 50 MG [Juvisynd]              | 1312411            | 20121203                        | 20991231                      |
| DPP4_SITA_V2              | 40243631          | Branded Drug Comp   | Simvastatin 20 MG / sitagliptin 100 MG [Juvisynd]             | 1189810            | 20111106                        | 20991231                      |
| DPP4_SITA_V2              | 42900899          | Branded Drug Comp   | Simvastatin 20 MG / sitagliptin 50 MG [Juvisynd]              | 1312418            | 20121203                        | 20991231                      |
| DPP4_SITA_V2              | 40243634          | Branded Drug Comp   | Simvastatin 40 MG / sitagliptin 100 MG [Juvisynd]             | 1189823            | 20111106                        | 20991231                      |
| DPP4_SITA_V2              | 42900902          | Branded Drug Comp   | Simvastatin 40 MG / sitagliptin 50 MG [Juvisynd]              | 1312425            | 20121203                        | 20991231                      |
| DPP4_SITA_V2              | 19125042          | Branded Drug Comp   | sitagliptin 100 MG [Januvia]                                  | 665034             | 20061217                        | 20991231                      |
| DPP4_SITA_V2              | 19125046          | Branded Drug Comp   | sitagliptin 25 MG [Januvia]                                   | 665039             | 20061217                        | 20991231                      |
| DPP4_SITA_V2              | 19125050          | Branded Drug Comp   | sitagliptin 50 MG [Januvia]                                   | 665043             | 20061217                        | 20991231                      |
| DPP4_SITA_V2              | 40243623          | Branded Drug Form   | Simvastatin / sitagliptin Oral Tablet [Juvisynd 100/10]       | 1189807            | 20111106                        | 20130331                      |
| DPP4_SITA_V2              | 40243625          | Branded Drug Form   | Simvastatin / sitagliptin Oral Tablet [Juvisynd 100/40]       | 1189824            | 20111106                        | 20130331                      |
| DPP4_SITA_V2              | 42900897          | Branded Drug Form   | Simvastatin / sitagliptin Oral Tablet [Juvisynd 50/10]        | 1312412            | 20121203                        | 20130331                      |
| DPP4_SITA_V2              | 42900900          | Branded Drug Form   | Simvastatin / sitagliptin Oral Tablet [Juvisynd 50/20]        | 1312419            | 20121203                        | 20130331                      |

| <b>Broader Drug Class</b> | <b>Concept ID</b> | <b>Class Type</b>   | <b>Trade or Brand Name</b>                             | <b>RX CUI Code</b> | <b>Start Date of Valid Code</b> | <b>End Date of Valid Code</b> |
|---------------------------|-------------------|---------------------|--------------------------------------------------------|--------------------|---------------------------------|-------------------------------|
| DPP4_SITA_V2              | 42900903          | Branded Drug Form   | Simvastatin / sitagliptin Oral Tablet [Juvisync 50/40] | 1312426            | 20121203                        | 20130331                      |
| DPP4_SITA_V2              | 40243624          | Branded Drug Form   | Simvastatin / sitagliptin Oral Tablet [Juvisync]       | 1189811            | 20111106                        | 20991231                      |
| DPP4_SITA_V2              | 40136770          | Branded Drug Form   | sitagliptin Oral Tablet [Januvia]                      | 665035             | 20061217                        | 20991231                      |
| DPP4_SITA_V2              | 36240261          | Clinical Dose Group | Simvastatin / sitagliptin Oral Product                 | 1189800            | 20160801                        | 20991231                      |
| DPP4_SITA_V2              | 36240262          | Clinical Dose Group | Simvastatin / sitagliptin Pill                         | 1189801            | 20160801                        | 20991231                      |
| DPP4_SITA_V2              | 36224403          | Clinical Dose Group | sitagliptin Oral Product                               | 1159662            | 20160801                        | 20991231                      |
| DPP4_SITA_V2              | 36224404          | Clinical Dose Group | sitagliptin Pill                                       | 1159663            | 20160801                        | 20991231                      |
| DPP4_SITA_V2              | 40243626          | Clinical Drug       | Simvastatin 10 MG / sitagliptin 100 MG Oral Tablet     | 1189804            | 20111106                        | 20991231                      |
| DPP4_SITA_V2              | 42901618          | Clinical Drug       | Simvastatin 10 MG / sitagliptin 50 MG Oral Tablet      | 1312409            | 20121203                        | 20991231                      |
| DPP4_SITA_V2              | 40243629          | Clinical Drug       | Simvastatin 20 MG / sitagliptin 100 MG Oral Tablet     | 1189808            | 20111106                        | 20991231                      |
| DPP4_SITA_V2              | 42901620          | Clinical Drug       | Simvastatin 20 MG / sitagliptin 50 MG Oral Tablet      | 1312416            | 20121203                        | 20991231                      |
| DPP4_SITA_V2              | 40243632          | Clinical Drug       | Simvastatin 40 MG / sitagliptin 100 MG Oral Tablet     | 1189821            | 20111106                        | 20991231                      |
| DPP4_SITA_V2              | 42901622          | Clinical Drug       | Simvastatin 40 MG / sitagliptin 50 MG Oral Tablet      | 1312423            | 20121203                        | 20991231                      |
| DPP4_SITA_V2              | 19125041          | Clinical Drug       | sitagliptin 100 MG Oral Tablet                         | 665033             | 20061217                        | 20991231                      |
| DPP4_SITA_V2              | 19125045          | Clinical Drug       | sitagliptin 25 MG Oral Tablet                          | 665038             | 20061217                        | 20991231                      |
| DPP4_SITA_V2              | 19125049          | Clinical Drug       | sitagliptin 50 MG Oral Tablet                          | 665042             | 20061217                        | 20991231                      |
| DPP4_SITA_V2              | 19125040          | Clinical Drug Comp  | sitagliptin 100 MG                                     | 665031             | 20061217                        | 20991231                      |
| DPP4_SITA_V2              | 19125044          | Clinical Drug Comp  | sitagliptin 25 MG                                      | 665037             | 20061217                        | 20991231                      |
| DPP4_SITA_V2              | 19125048          | Clinical Drug Comp  | sitagliptin 50 MG                                      | 665041             | 20061217                        | 20991231                      |
| DPP4_SITA_V2              | 40144206          | Clinical Drug Comp  | sitagliptin 64.3 MG                                    | 748762             | 20071230                        | 20081109                      |
| DPP4_SITA_V2              | 40243622          | Clinical Drug Form  | Simvastatin / sitagliptin Oral Tablet                  | 1189802            | 20111106                        | 20991231                      |
| DPP4_SITA_V2              | 40136769          | Clinical Drug Form  | sitagliptin Oral Tablet                                | 665032             | 20061217                        | 20991231                      |
| DPP4_SITA_V2              | 1580747           | Ingredient          | sitagliptin                                            | 593411             | 20061217                        | 20991231                      |
| DPP4_SITA_V2              | 19123869          | Precise Ingredient  | sitagliptin phosphate                                  | 621590             | 20070429                        | 20991231                      |
| GLP1_EXEN_V2              | 42705841          | Brand Name          | Bydureon                                               | 1242964            | 20120507                        | 20991231                      |
| GLP1_EXEN_V2              | 19083252          | Brand Name          | Byetta                                                 | 604751             | 20060226                        | 20991231                      |
| GLP1_EXEN_V2              | 36238252          | Branded Dose Group  | Bydureon Injectable Product                            | 1242967            | 20160801                        | 20991231                      |
| GLP1_EXEN_V2              | 36234709          | Branded Dose Group  | Byetta Injectable Product                              | 1169415            | 20160801                        | 20991231                      |
| GLP1_EXEN_V2              | 42902689          | Branded Drug        | exenatide 0.005 MG/ACTUAT Pen Injector [Byetta]        | 1359802            | 20121203                        | 20991231                      |
| GLP1_EXEN_V2              | 42902866          | Branded Drug        | exenatide 0.01 MG/ACTUAT Pen Injector [Byetta]         | 1359979            | 20121203                        | 20991231                      |
| GLP1_EXEN_V2              | 19127574          | Branded Drug        | exenatide 0.25 MG/ML Injectable Solution [Byetta]      | 744865             | 20071230                        | 20150705                      |
| GLP1_EXEN_V2              | 40129513          | Branded Drug        | exenatide 0.250 MG/ML Injectable Solution [Byetta]     | 604754             | 20060226                        | 20160311                      |
| GLP1_EXEN_V2              | 42708079          | Branded Drug        | exenatide 2 MG Injection [Bydureon]                    | 1242968            | 20120507                        | 20991231                      |
| GLP1_EXEN_V2              | 793116            | Branded Drug        | exenatide 2.35 MG/ML Auto-Injector [Bydureon]          | 1990871            | 20180205                        | 20991231                      |
| GLP1_EXEN_V2              | 45774535          | Branded Drug        | exenatide 3.08 MG/ML Pen Injector [Bydureon]           | 1544920            | 20141201                        | 20991231                      |
| GLP1_EXEN_V2              | 19083254          | Branded Drug Comp   | exenatide 0.005 MG/ACTUAT [Byetta]                     | 847916             | 20090503                        | 20991231                      |
| GLP1_EXEN_V2              | 19083253          | Branded Drug Comp   | exenatide 0.01 MG/ACTUAT [Byetta]                      | 847911             | 20090503                        | 20991231                      |
| GLP1_EXEN_V2              | 19127573          | Branded Drug Comp   | exenatide 0.25 MG/ML [Byetta]                          | 744864             | 20071230                        | 20150705                      |
| GLP1_EXEN_V2              | 40129514          | Branded Drug Comp   | exenatide 0.250 MG/ML [Byetta]                         | 604752             | 20060226                        | 20160311                      |

| <b>Broader Drug Class</b> | <b>Concept ID</b> | <b>Class Type</b>   | <b>Trade or Brand Name</b>                                | <b>RX CUI Code</b> | <b>Start Date of Valid Code</b> | <b>End Date of Valid Code</b> |
|---------------------------|-------------------|---------------------|-----------------------------------------------------------|--------------------|---------------------------------|-------------------------------|
| GLP1_EXEN_V2              | 46234118          | Branded Drug Comp   | exenatide 2 MG [Bydureon]                                 | 1653613            | 20150706                        | 20991231                      |
| GLP1_EXEN_V2              | 793112            | Branded Drug Comp   | exenatide 2.35 MG/ML [Bydureon]                           | 1990867            | 20180205                        | 20991231                      |
| GLP1_EXEN_V2              | 42705842          | Branded Drug Comp   | exenatide 3.08 MG/ML [Bydureon]                           | 1242965            | 20120507                        | 20991231                      |
| GLP1_EXEN_V2              | 793113            | Branded Drug Form   | exenatide Auto-Injector [Bydureon]                        | 1990868            | 20180205                        | 20991231                      |
| GLP1_EXEN_V2              | 40129516          | Branded Drug Form   | exenatide Injectable Solution [Byetta]                    | 604753             | 20060226                        | 20150705                      |
| GLP1_EXEN_V2              | 42705843          | Branded Drug Form   | exenatide Injectable Suspension [Bydureon]                | 1242966            | 20120507                        | 20150705                      |
| GLP1_EXEN_V2              | 46234119          | Branded Drug Form   | exenatide Injection [Bydureon]                            | 1653614            | 20150706                        | 20991231                      |
| GLP1_EXEN_V2              | 46234121          | Branded Drug Form   | exenatide Pen Injector [Bydureon]                         | 1653619            | 20150706                        | 20991231                      |
| GLP1_EXEN_V2              | 46234122          | Branded Drug Form   | exenatide Pen Injector [Byetta]                           | 1653625            | 20150706                        | 20991231                      |
| GLP1_EXEN_V2              | 45774532          | Branded Drug Form   | exenatide Prefilled Syringe [Bydureon]                    | 1544917            | 20141201                        | 20150705                      |
| GLP1_EXEN_V2              | 40159897          | Branded Drug Form   | exenatide Prefilled Syringe [Byetta]                      | 847912             | 20090503                        | 20150705                      |
| GLP1_EXEN_V2              | 36222278          | Clinical Dose Group | exenatide Injectable Product                              | 1163790            | 20160801                        | 20991231                      |
| GLP1_EXEN_V2              | 42902527          | Clinical Drug       | exenatide 0.005 MG/ACTUAT Pen Injector                    | 1359640            | 20121203                        | 20991231                      |
| GLP1_EXEN_V2              | 42903341          | Clinical Drug       | exenatide 0.01 MG/ACTUAT Pen Injector                     | 1360454            | 20121203                        | 20991231                      |
| GLP1_EXEN_V2              | 1583724           | Clinical Drug       | exenatide 0.25 MG/ML Injectable Solution                  | 744863             | 20071230                        | 20150705                      |
| GLP1_EXEN_V2              | 40129512          | Clinical Drug       | exenatide 0.250 MG/ML Injectable Solution                 | 604750             | 20060226                        | 20160311                      |
| GLP1_EXEN_V2              | 42708078          | Clinical Drug       | exenatide 2 MG Injection                                  | 1242963            | 20120507                        | 20991231                      |
| GLP1_EXEN_V2              | 793115            | Clinical Drug       | exenatide 2.35 MG/ML Auto-Injector                        | 1990870            | 20180205                        | 20991231                      |
| GLP1_EXEN_V2              | 45774534          | Clinical Drug       | exenatide 3.08 MG/ML Pen Injector                         | 1544919            | 20141201                        | 20991231                      |
| GLP1_EXEN_V2              | 1583728           | Clinical Drug Comp  | exenatide 0.005 MG/ACTUAT                                 | 847914             | 20090503                        | 20991231                      |
| GLP1_EXEN_V2              | 19135404          | Clinical Drug Comp  | exenatide 0.01 MG/ACTUAT                                  | 847908             | 20090503                        | 20991231                      |
| GLP1_EXEN_V2              | 1583723           | Clinical Drug Comp  | exenatide 0.25 MG/ML                                      | 744862             | 20071230                        | 20150705                      |
| GLP1_EXEN_V2              | 40129511          | Clinical Drug Comp  | exenatide 0.250 MG/ML                                     | 604748             | 20060226                        | 20160311                      |
| GLP1_EXEN_V2              | 46234116          | Clinical Drug Comp  | exenatide 2 MG                                            | 1653610            | 20150706                        | 20991231                      |
| GLP1_EXEN_V2              | 793109            | Clinical Drug Comp  | exenatide 2.35 MG/ML                                      | 1990864            | 20180205                        | 20991231                      |
| GLP1_EXEN_V2              | 42705839          | Clinical Drug Comp  | exenatide 3.08 MG/ML                                      | 1242961            | 20120507                        | 20991231                      |
| GLP1_EXEN_V2              | 793110            | Clinical Drug Form  | exenatide Auto-Injector                                   | 1990865            | 20180205                        | 20991231                      |
| GLP1_EXEN_V2              | 40129515          | Clinical Drug Form  | exenatide Injectable Solution                             | 604749             | 20060226                        | 20150705                      |
| GLP1_EXEN_V2              | 42705840          | Clinical Drug Form  | exenatide Injectable Suspension                           | 1242962            | 20120507                        | 20150705                      |
| GLP1_EXEN_V2              | 46234117          | Clinical Drug Form  | exenatide Injection                                       | 1653611            | 20150706                        | 20991231                      |
| GLP1_EXEN_V2              | 46234120          | Clinical Drug Form  | exenatide Pen Injector                                    | 1653616            | 20150706                        | 20991231                      |
| GLP1_EXEN_V2              | 40159896          | Clinical Drug Form  | exenatide Prefilled Syringe                               | 847909             | 20090503                        | 20150705                      |
| GLP1_EXEN_V2              | 1583722           | Ingredient          | exenatide                                                 | 60548              | 20060226                        | 20991231                      |
| GLP1_EXEN_V2              | 45774533          | Quant Branded Drug  | 0.65 ML exenatide 3.08 MG/ML Pen Injector [Bydureon]      | 1544918            | 20141201                        | 20991231                      |
| GLP1_EXEN_V2              | 793114            | Quant Branded Drug  | 0.85 ML exenatide 2.35 MG/ML Auto-Injector [Bydureon]     | 1990869            | 20180205                        | 20991231                      |
| GLP1_EXEN_V2              | 1583730           | Quant Branded Drug  | 60 ACTUAT exenatide 0.005 MG/ACTUAT Pen Injector [Byetta] | 847917             | 20090503                        | 20991231                      |
| GLP1_EXEN_V2              | 1583727           | Quant Branded Drug  | 60 ACTUAT exenatide 0.01 MG/ACTUAT Pen Injector [Byetta]  | 847913             | 20090503                        | 20991231                      |
| GLP1_EXEN_V2              | 45774531          | Quant Clinical Drug | 0.65 ML exenatide 3.08 MG/ML Pen Injector                 | 1544916            | 20141201                        | 20991231                      |
| GLP1_EXEN_V2              | 793111            | Quant Clinical Drug | 0.85 ML exenatide 2.35 MG/ML Auto-Injector                | 1990866            | 20180205                        | 20991231                      |

| <b>Broader Drug Class</b> | <b>Concept ID</b> | <b>Class Type</b>   | <b>Trade or Brand Name</b>                       | <b>RX CUI Code</b> | <b>Start Date of Valid Code</b> | <b>End Date of Valid Code</b> |
|---------------------------|-------------------|---------------------|--------------------------------------------------|--------------------|---------------------------------|-------------------------------|
| GLP1_EXEN_V2              | 1583729           | Quant Clinical Drug | 60 ACTUAT exenatide 0.005 MG/ACTUAT Pen Injector | 847915             | 20090503                        | 20991231                      |
| GLP1_EXEN_V2              | 19135405          | Quant Clinical Drug | 60 ACTUAT exenatide 0.01 MG/ACTUAT Pen Injector  | 847910             | 20090503                        | 20991231                      |
| GLP1_LIRA_V2              | 45892683          | Brand Name          | Saxenda                                          | 1598264            | 20150302                        | 20991231                      |
| GLP1_LIRA_V2              | 40170305          | Brand Name          | Victoza                                          | 897123             | 20100131                        | 20991231                      |
| GLP1_LIRA_V2              | 36248956          | Branded Dose Group  | Saxenda Injectable Product                       | 1598267            | 20160801                        | 20991231                      |
| GLP1_LIRA_V2              | 36241903          | Branded Dose Group  | Victoza Injectable Product                       | 1186578            | 20160801                        | 20991231                      |
| GLP1_LIRA_V2              | 45892687          | Branded Drug        | liraglutide 6 MG/ML Pen Injector [Saxenda]       | 1598269            | 20150302                        | 20991231                      |
| GLP1_LIRA_V2              | 42903382          | Branded Drug        | liraglutide 6 MG/ML Pen Injector [Victoza]       | 1360495            | 20121203                        | 20991231                      |
| GLP1_LIRA_V2              | 45892684          | Branded Drug Comp   | liraglutide 6 MG/ML [Saxenda]                    | 1598265            | 20150302                        | 20991231                      |
| GLP1_LIRA_V2              | 40170913          | Branded Drug Comp   | liraglutide 6 MG/ML [Victoza]                    | 897124             | 20100131                        | 20991231                      |
| GLP1_LIRA_V2              | 46234112          | Branded Drug Form   | liraglutide Pen Injector [Saxenda]               | 1653600            | 20150706                        | 20991231                      |
| GLP1_LIRA_V2              | 46234111          | Branded Drug Form   | liraglutide Pen Injector [Victoza]               | 1653597            | 20150706                        | 20991231                      |
| GLP1_LIRA_V2              | 45892685          | Branded Drug Form   | liraglutide Prefilled Syringe [Saxenda]          | 1598266            | 20150302                        | 20150705                      |
| GLP1_LIRA_V2              | 40170915          | Branded Drug Form   | liraglutide Prefilled Syringe [Victoza]          | 897125             | 20100131                        | 20150705                      |
| GLP1_LIRA_V2              | 36220119          | Clinical Dose Group | liraglutide Injectable Product                   | 1163230            | 20160801                        | 20991231                      |
| GLP1_LIRA_V2              | 42902992          | Clinical Drug       | liraglutide 6 MG/ML Pen Injector                 | 1360105            | 20121203                        | 20991231                      |
| GLP1_LIRA_V2              | 1718703           | Clinical Drug Comp  | liraglutide 3.6 MG/ML                            | 1860164            | 20170103                        | 20991231                      |
| GLP1_LIRA_V2              | 40170912          | Clinical Drug Comp  | liraglutide 6 MG/ML                              | 897120             | 20100131                        | 20991231                      |
| GLP1_LIRA_V2              | 46234110          | Clinical Drug Form  | liraglutide Pen Injector                         | 1653594            | 20150706                        | 20991231                      |
| GLP1_LIRA_V2              | 40170914          | Clinical Drug Form  | liraglutide Prefilled Syringe                    | 897121             | 20100131                        | 20150705                      |
| GLP1_LIRA_V2              | 40170911          | Ingredient          | liraglutide                                      | 475968             | 20100131                        | 20991231                      |
| GLP1_LIRA_V2              | 45892686          | Quant Branded Drug  | 3 ML liraglutide 6 MG/ML Pen Injector [Saxenda]  | 1598268            | 20150302                        | 20991231                      |
| GLP1_LIRA_V2              | 40169223          | Quant Branded Drug  | 3 ML liraglutide 6 MG/ML Pen Injector [Victoza]  | 897126             | 20100131                        | 20991231                      |
| GLP1_LIRA_V2              | 40169222          | Quant Clinical Drug | 3 ML liraglutide 6 MG/ML Pen Injector            | 897122             | 20100131                        | 20991231                      |
| INSULIN                   | 793219            | Brand Name          | Admelog                                          | 1992165            | 20180205                        | 20991231                      |
| INSULIN                   | 19084603          | Brand Name          | Apidra                                           | 607583             | 20080831                        | 20991231                      |
| INSULIN                   | 35604091          | Brand Name          | Basaglar                                         | 1736859            | 20160502                        | 20991231                      |
| INSULIN                   | 19016116          | Brand Name          | Humalog                                          | 135805             | 19700101                        | 20991231                      |
| INSULIN                   | 19068551          | Brand Name          | Humalog Mix                                      | 261542             | 19700101                        | 20991231                      |
| INSULIN                   | 19033126          | Brand Name          | Humalog Mix 50/50                                | 352691             | 20071230                        | 20130331                      |
| INSULIN                   | 19018821          | Brand Name          | Humalog Mix 75/25                                | 741394             | 20080127                        | 20130331                      |
| INSULIN                   | 19053992          | Brand Name          | Hypurin Bovine Isophane                          | 226290             | 19700101                        | 20991231                      |
| INSULIN                   | 19053993          | Brand Name          | Hypurin Bovine Lente                             | 226291             | 19700101                        | 20991231                      |
| INSULIN                   | 19053994          | Brand Name          | Hypurin Bovine Neutral                           | 226292             | 19700101                        | 20991231                      |
| INSULIN                   | 19053995          | Brand Name          | Hypurin Bovine Protamine Zinc                    | 226293             | 19700101                        | 20991231                      |
| INSULIN                   | 19053996          | Brand Name          | Hypurin Porcine Biphasic Isophane                | 226294             | 19700101                        | 20991231                      |
| INSULIN                   | 19101456          | Brand Name          | Hypurin Porcine Isophane                         | 386088             | 19700101                        | 20991231                      |
| INSULIN                   | 19101455          | Brand Name          | Hypurin Porcine Neutral                          | 386086             | 19700101                        | 20991231                      |
| INSULIN                   | 19069827          | Brand Name          | Insulin Pork Mix                                 | 217745             | 19700101                        | 20991231                      |

| <b>Broader Drug Class</b> | <b>Concept ID</b> | <b>Class Type</b>  | <b>Trade or Brand Name</b>                    | <b>RX CUI Code</b> | <b>Start Date of Valid Code</b> | <b>End Date of Valid Code</b> |
|---------------------------|-------------------|--------------------|-----------------------------------------------|--------------------|---------------------------------|-------------------------------|
| INSULIN                   | 19099465          | Brand Name         | Lantus                                        | 261551             | 19700101                        | 20991231                      |
| INSULIN                   | 19044920          | Brand Name         | Levemir                                       | 400560             | 20060402                        | 20991231                      |
| INSULIN                   | 19123374          | Brand Name         | Lispro PRC                                    | 615907             | 20060402                        | 20991231                      |
| INSULIN                   | 19096852          | Brand Name         | Novo Nordisk brand of insulin nph beef        | 349670             | 19700101                        | 20991231                      |
| INSULIN                   | 19096856          | Brand Name         | Novo Nordisk brand of insulin regular pork    | 349675             | 19700101                        | 20991231                      |
| INSULIN                   | 19096857          | Brand Name         | Novo Nordisk brand of insulin ultralente beef | 349676             | 19700101                        | 20991231                      |
| INSULIN                   | 43525509          | Brand Name         | Novolin                                       | 1372723            | 20130401                        | 20991231                      |
| INSULIN                   | 19062998          | Brand Name         | Novolin 70/30                                 | 93555              | 19700101                        | 20130331                      |
| INSULIN                   | 19100539          | Brand Name         | Novolin 70/30 PenFill                         | 379753             | 19700101                        | 20991231                      |
| INSULIN                   | 19063000          | Brand Name         | Novolin L                                     | 93557              | 19700101                        | 20991231                      |
| INSULIN                   | 19063032          | Brand Name         | Novolin N                                     | 93558              | 19700101                        | 20991231                      |
| INSULIN                   | 19102988          | Brand Name         | Novolin N PenFill                             | 405228             | 19700101                        | 20991231                      |
| INSULIN                   | 19063034          | Brand Name         | Novolin R                                     | 93560              | 19700101                        | 20991231                      |
| INSULIN                   | 19005728          | Brand Name         | NovoLog                                       | 284810             | 19700101                        | 20991231                      |
| INSULIN                   | 43525527          | Brand Name         | NovoLog Mix                                   | 1372741            | 20130401                        | 20991231                      |
| INSULIN                   | 19033760          | Brand Name         | NovoLog Mix 70/30                             | 352817             | 19700101                        | 20160311                      |
| INSULIN                   | 40187714          | Brand Name         | NovoLog Mix 70/30                             | 977837             | 20100606                        | 20130331                      |
| INSULIN                   | 19100538          | Brand Name         | NovoLog Penfill                               | 379750             | 19700101                        | 20991231                      |
| INSULIN                   | 19101415          | Brand Name         | Pur-In Isophane                               | 385902             | 19700101                        | 20991231                      |
| INSULIN                   | 43525547          | Brand Name         | Pur-In Mix                                    | 1372761            | 20130401                        | 20991231                      |
| INSULIN                   | 19100125          | Brand Name         | Pur-In Mix 15/85                              | 360891             | 19700101                        | 20130331                      |
| INSULIN                   | 19100126          | Brand Name         | Pur-In Mix 25/75                              | 360892             | 19700101                        | 20130331                      |
| INSULIN                   | 19100129          | Brand Name         | Pur-In Mix 50/50                              | 360895             | 19700101                        | 20130331                      |
| INSULIN                   | 19101414          | Brand Name         | Pur-In Neutral                                | 385895             | 19700101                        | 20991231                      |
| INSULIN                   | 19126943          | Brand Name         | ReliOn R/Novolin                              | 723550             | 20070729                        | 20991231                      |
| INSULIN                   | 19126968          | Brand Name         | ReliOn/Novolin 70/30                          | 724339             | 20070729                        | 20991231                      |
| INSULIN                   | 19126969          | Brand Name         | ReliOn/Novolin N                              | 724343             | 20070729                        | 20991231                      |
| INSULIN                   | 1718600           | Brand Name         | Soliqua                                       | 1858996            | 20170103                        | 20991231                      |
| INSULIN                   | 46221554          | Brand Name         | Toujeo                                        | 1604540            | 20150504                        | 20991231                      |
| INSULIN                   | 35602721          | Brand Name         | Tresiba                                       | 1670012            | 20160502                        | 20991231                      |
| INSULIN                   | 1718707           | Brand Name         | Xultophy                                      | 1860168            | 20170103                        | 20991231                      |
| INSULIN                   | 793222            | Branded Dose Group | Admelog Injectable Product                    | 1992168            | 20180205                        | 20991231                      |
| INSULIN                   | 36233154          | Branded Dose Group | Apidra Injectable Product                     | 1168563            | 20160801                        | 20991231                      |
| INSULIN                   | 36248425          | Branded Dose Group | Basaglar Injectable Product                   | 1736862            | 20160801                        | 20991231                      |
| INSULIN                   | 36236032          | Branded Dose Group | Humalog Injectable Product                    | 1171289            | 20160801                        | 20991231                      |
| INSULIN                   | 36236033          | Branded Dose Group | Humalog Mix Injectable Product                | 1171291            | 20160801                        | 20991231                      |
| INSULIN                   | 36232390          | Branded Dose Group | Hypurin Bovine Isophane Injectable Product    | 1176722            | 20160801                        | 20991231                      |
| INSULIN                   | 36232391          | Branded Dose Group | Hypurin Bovine Lente Injectable Product       | 1176723            | 20160801                        | 20991231                      |
| INSULIN                   | 36232392          | Branded Dose Group | Hypurin Bovine Neutral Injectable Product     | 1176724            | 20160801                        | 20991231                      |

| <b>Broader Drug Class</b> | <b>Concept ID</b> | <b>Class Type</b>  | <b>Trade or Brand Name</b>                                       | <b>RX CUI Code</b> | <b>Start Date of Valid Code</b> | <b>End Date of Valid Code</b> |
|---------------------------|-------------------|--------------------|------------------------------------------------------------------|--------------------|---------------------------------|-------------------------------|
| INSULIN                   | 36232393          | Branded Dose Group | Hypurin Bovine Protamine Zinc Injectable Product                 | 1176725            | 20160801                        | 20991231                      |
| INSULIN                   | 36232394          | Branded Dose Group | Hypurin Porcine Biphasic Isophane Injectable Product             | 1176726            | 20160801                        | 20991231                      |
| INSULIN                   | 36232395          | Branded Dose Group | Hypurin Porcine Isophane Injectable Product                      | 1176727            | 20160801                        | 20991231                      |
| INSULIN                   | 36232396          | Branded Dose Group | Hypurin Porcine Neutral Injectable Product                       | 1176728            | 20160801                        | 20991231                      |
| INSULIN                   | 36229086          | Branded Dose Group | Lantus Injectable Product                                        | 1175624            | 20160801                        | 20991231                      |
| INSULIN                   | 36222190          | Branded Dose Group | Levemir Injectable Product                                       | 1167934            | 20160801                        | 20991231                      |
| INSULIN                   | 36227902          | Branded Dose Group | Lispro PRC Injectable Product                                    | 1178571            | 20160801                        | 20991231                      |
| INSULIN                   | 36231456          | Branded Dose Group | Novolin Injectable Product                                       | 1178125            | 20160801                        | 20991231                      |
| INSULIN                   | 36231457          | Branded Dose Group | Novolin L Injectable Product                                     | 1178126            | 20160801                        | 20991231                      |
| INSULIN                   | 36231458          | Branded Dose Group | Novolin N Injectable Product                                     | 1178127            | 20160801                        | 20991231                      |
| INSULIN                   | 36231459          | Branded Dose Group | Novolin R Injectable Product                                     | 1178128            | 20160801                        | 20991231                      |
| INSULIN                   | 36231450          | Branded Dose Group | NovoLog Injectable Product                                       | 1178119            | 20160801                        | 20991231                      |
| INSULIN                   | 36231451          | Branded Dose Group | NovoLog Mix Injectable Product                                   | 1178120            | 20160801                        | 20991231                      |
| INSULIN                   | 36241496          | Branded Dose Group | Pur-In Isophane Injectable Product                               | 1183564            | 20160801                        | 20991231                      |
| INSULIN                   | 36241497          | Branded Dose Group | Pur-In Mix Injectable Product                                    | 1183566            | 20160801                        | 20991231                      |
| INSULIN                   | 36241498          | Branded Dose Group | Pur-In Neutral Injectable Product                                | 1183568            | 20160801                        | 20991231                      |
| INSULIN                   | 1718603           | Branded Dose Group | Soliqua Injectable Product                                       | 1858999            | 20170103                        | 20991231                      |
| INSULIN                   | 36248870          | Branded Dose Group | Toujeo Injectable Product                                        | 1604543            | 20160801                        | 20991231                      |
| INSULIN                   | 36248196          | Branded Dose Group | Tresiba Injectable Product                                       | 1670015            | 20160801                        | 20991231                      |
| INSULIN                   | 1718710           | Branded Dose Group | Xultophy Injectable Product                                      | 1860171            | 20170103                        | 20991231                      |
|                           |                   |                    | insulin degludec 100 UNT/ML / liraglutide 3.6 MG/ML Pen Injector |                    |                                 |                               |
| INSULIN                   | 1718713           | Branded Drug       | [Xultophy]                                                       | 1860174            | 20170103                        | 20991231                      |
| INSULIN                   | 35602726          | Branded Drug       | insulin degludec 100 UNT/ML Pen Injector [Tresiba]               | 1670018            | 20160502                        | 20991231                      |
| INSULIN                   | 35602733          | Branded Drug       | insulin degludec 200 UNT/ML Pen Injector [Tresiba]               | 1670025            | 20160502                        | 20991231                      |
| INSULIN                   | 42903168          | Branded Drug       | insulin detemir 100 UNT/ML Pen Injector [Levemir]                | 1360281            | 20121203                        | 20991231                      |
|                           |                   |                    | Insulin Glargine 100 UNT/ML / Lixisenatide 0.033 MG/ML Pen       |                    |                                 |                               |
| INSULIN                   | 1718606           | Branded Drug       | Injector [Soliqua]                                               | 1859002            | 20170103                        | 20991231                      |
| INSULIN                   | 19071700          | Branded Drug       | Insulin Glargine 100 UNT/ML Injectable Solution [Lantus]         | 285018             | 19700101                        | 20991231                      |
| INSULIN                   | 40144637          | Branded Drug       | Insulin Glargine 100 UNT/ML Injectable Solution [Solostar]       | 751549             | 20080127                        | 20090104                      |
| INSULIN                   | 35604095          | Branded Drug       | Insulin Glargine 100 UNT/ML Pen Injector [Basaglar]              | 1736864            | 20160502                        | 20991231                      |
| INSULIN                   | 42902743          | Branded Drug       | Insulin Glargine 100 UNT/ML Pen Injector [Lantus]                | 1359856            | 20121203                        | 20991231                      |
| INSULIN                   | 46221559          | Branded Drug       | Insulin Glargine 300 UNT/ML Pen Injector [Toujeo]                | 1604546            | 20150504                        | 20991231                      |
| INSULIN                   | 46233978          | Branded Drug       | Insulin Lispro 100 UNT/ML Cartridge [Humalog]                    | 1652648            | 20150706                        | 20991231                      |
| INSULIN                   | 793223            | Branded Drug       | Insulin Lispro 100 UNT/ML Injectable Solution [Admelog]          | 1992169            | 20180205                        | 20991231                      |
| INSULIN                   | 40166274          | Branded Drug       | Insulin Lispro 100 UNT/ML Injectable Solution [Humalog]          | 865098             | 20091004                        | 20991231                      |
| INSULIN                   | 19123376          | Branded Drug       | Insulin Lispro 100 UNT/ML Injectable Solution [Lispro PRC]       | 615910             | 20060402                        | 20991231                      |
| INSULIN                   | 793226            | Branded Drug       | Insulin Lispro 100 UNT/ML Pen Injector [Admelog]                 | 1992172            | 20180205                        | 20991231                      |
| INSULIN                   | 46233972          | Branded Drug       | Insulin Lispro 100 UNT/ML Pen Injector [Humalog]                 | 1652642            | 20150706                        | 20991231                      |
| INSULIN                   | 42903169          | Branded Drug       | Insulin Lispro 100 UNT/ML Prefilled Syringe [Humalog]            | 1360282            | 20121203                        | 20150705                      |



| <b>Broader Drug Class</b> | <b>Concept ID</b> | <b>Class Type</b>   | <b>Trade or Brand Name</b>                                       | <b>RX CUI Code</b> | <b>Start Date of Valid Code</b> | <b>End Date of Valid Code</b> |
|---------------------------|-------------------|---------------------|------------------------------------------------------------------|--------------------|---------------------------------|-------------------------------|
| INSULIN                   | 46233950          | Branded Drug        | Insulin Lispro 200 UNT/ML Pen Injector [Humalog]                 | 1652244            | 20150706                        | 20991231                      |
| INSULIN                   | 1718708           | Branded Drug Comp   | insulin degludec 100 UNT/ML / liraglutide 3.6 MG/ML [Xultophy]   | 1860169            | 20170103                        | 20991231                      |
| INSULIN                   | 35602722          | Branded Drug Comp   | insulin degludec 100 UNT/ML [Tresiba]                            | 1670013            | 20160502                        | 20991231                      |
| INSULIN                   | 35602730          | Branded Drug Comp   | insulin degludec 200 UNT/ML [Tresiba]                            | 1670022            | 20160502                        | 20991231                      |
| INSULIN                   | 19044971          | Branded Drug Comp   | insulin detemir 100 UNT/ML [Levemir]                             | 616236             | 20060402                        | 20991231                      |
| INSULIN                   | 1718601           | Branded Drug Comp   | Insulin Glargine 100 UNT/ML / Lixisenatide 0.033 MG/ML [Soliqua] | 1858997            | 20170103                        | 20991231                      |
| INSULIN                   | 35604092          | Branded Drug Comp   | Insulin Glargine 100 UNT/ML [Basaglar]                           | 1736860            | 20160502                        | 20991231                      |
| INSULIN                   | 40144638          | Branded Drug Comp   | Insulin Glargine 100 UNT/ML [Solostar]                           | 751547             | 20080127                        | 20090104                      |
| INSULIN                   | 46221555          | Branded Drug Comp   | Insulin Glargine 300 UNT/ML [Toujeo]                             | 1604541            | 20150504                        | 20991231                      |
| INSULIN                   | 793220            | Branded Drug Comp   | Insulin Lispro 100 UNT/ML [Admelog]                              | 1992166            | 20180205                        | 20991231                      |
| INSULIN                   | 19016117          | Branded Drug Comp   | Insulin Lispro 100 UNT/ML [Humalog]                              | 575151             | 20050911                        | 20991231                      |
| INSULIN                   | 19123375          | Branded Drug Comp   | Insulin Lispro 100 UNT/ML [Lispro PRC]                           | 615908             | 20060402                        | 20991231                      |
| INSULIN                   | 46233946          | Branded Drug Comp   | Insulin Lispro 200 UNT/ML [Humalog]                              | 1652240            | 20150706                        | 20991231                      |
| INSULIN                   | 1718709           | Branded Drug Form   | insulin degludec / liraglutide Pen Injector [Xultophy]           | 1860170            | 20170103                        | 20991231                      |
| INSULIN                   | 35602723          | Branded Drug Form   | insulin degludec Pen Injector [Tresiba]                          | 1670014            | 20160502                        | 20991231                      |
| INSULIN                   | 40130712          | Branded Drug Form   | insulin detemir Injectable Solution [Levemir]                    | 616237             | 20060402                        | 20991231                      |
| INSULIN                   | 46234191          | Branded Drug Form   | insulin detemir Pen Injector [Levemir]                           | 1654192            | 20150706                        | 20991231                      |
| INSULIN                   | 40159980          | Branded Drug Form   | insulin detemir Prefilled Syringe [Levemir]                      | 847240             | 20090503                        | 20150705                      |
| INSULIN                   | 1718602           | Branded Drug Form   | Insulin Glargine / Lixisenatide Pen Injector [Soliqua]           | 1858998            | 20170103                        | 20991231                      |
| INSULIN                   | 40051348          | Branded Drug Form   | Insulin Glargine Injectable Solution [Lantus]                    | 362585             | 19700101                        | 20991231                      |
| INSULIN                   | 40144639          | Branded Drug Form   | Insulin Glargine Injectable Solution [Solostar]                  | 751548             | 20080127                        | 20090104                      |
| INSULIN                   | 35604093          | Branded Drug Form   | Insulin Glargine Pen Injector [Basaglar]                         | 1736861            | 20160502                        | 20991231                      |
| INSULIN                   | 46234098          | Branded Drug Form   | Insulin Glargine Pen Injector [Lantus]                           | 1653499            | 20150706                        | 20991231                      |
| INSULIN                   | 46234099          | Branded Drug Form   | Insulin Glargine Pen Injector [Toujeo]                           | 1653506            | 20150706                        | 20991231                      |
| INSULIN                   | 40159318          | Branded Drug Form   | Insulin Glargine Prefilled Syringe [Lantus]                      | 847231             | 20090503                        | 20150705                      |
| INSULIN                   | 46221556          | Branded Drug Form   | Insulin Glargine Prefilled Syringe [Toujeo]                      | 1604542            | 20150504                        | 20150705                      |
| INSULIN                   | 46233975          | Branded Drug Form   | Insulin Lispro Cartridge [Humalog]                               | 1652645            | 20150706                        | 20991231                      |
| INSULIN                   | 793221            | Branded Drug Form   | Insulin Lispro Injectable Solution [Admelog]                     | 1992167            | 20180205                        | 20991231                      |
| INSULIN                   | 40166275          | Branded Drug Form   | Insulin Lispro Injectable Solution [Humalog]                     | 865097             | 20091004                        | 20991231                      |
| INSULIN                   | 40130843          | Branded Drug Form   | Insulin Lispro Injectable Solution [Lispro PRC]                  | 615909             | 20060402                        | 20991231                      |
| INSULIN                   | 793224            | Branded Drug Form   | Insulin Lispro Pen Injector [Admelog]                            | 1992170            | 20180205                        | 20991231                      |
| INSULIN                   | 46233947          | Branded Drug Form   | Insulin Lispro Pen Injector [Humalog]                            | 1652241            | 20150706                        | 20991231                      |
| INSULIN                   | 40159323          | Branded Drug Form   | Insulin Lispro Prefilled Syringe [Humalog]                       | 847208             | 20090503                        | 20150705                      |
| INSULIN                   | 1718704           | Clinical Dose Group | insulin degludec / liraglutide Injectable Product                | 1860165            | 20170103                        | 20991231                      |
| INSULIN                   | 36248195          | Clinical Dose Group | insulin degludec Injectable Product                              | 1670009            | 20160801                        | 20991231                      |
| INSULIN                   | 36224228          | Clinical Dose Group | insulin detemir Injectable Product                               | 1160696            | 20160801                        | 20991231                      |
| INSULIN                   | 1718597           | Clinical Dose Group | Insulin Glargine / Lixisenatide Injectable Product               | 1858992            | 20170103                        | 20991231                      |
| INSULIN                   | 36214699          | Clinical Dose Group | Insulin Glargine Injectable Product                              | 1157459            | 20160801                        | 20991231                      |
| INSULIN                   | 36214701          | Clinical Dose Group | Insulin Lispro Injectable Product                                | 1157461            | 20160801                        | 20991231                      |

| <b>Broader Drug Class</b> | <b>Concept ID</b> | <b>Class Type</b>  | <b>Trade or Brand Name</b>                                          | <b>RX CUI Code</b> | <b>Start Date of Valid Code</b> | <b>End Date of Valid Code</b> |
|---------------------------|-------------------|--------------------|---------------------------------------------------------------------|--------------------|---------------------------------|-------------------------------|
| INSULIN                   | 40141048          | Clinical Drug      | 3 ML insulin detemir 100 UNT/ML Prefilled Syringe                   | 727837             | 20070902                        | 20131202                      |
| INSULIN                   | 1718712           | Clinical Drug      | insulin degludec 100 UNT/ML / liraglutide 3.6 MG/ML Pen Injector    | 1860173            | 20170103                        | 20991231                      |
| INSULIN                   | 35602725          | Clinical Drug      | insulin degludec 100 UNT/ML Pen Injector                            | 1670017            | 20160502                        | 20991231                      |
| INSULIN                   | 35602732          | Clinical Drug      | insulin degludec 200 UNT/ML Pen Injector                            | 1670024            | 20160502                        | 20991231                      |
| INSULIN                   | 42902821          | Clinical Drug      | insulin detemir 100 UNT/ML Pen Injector                             | 1359934            | 20121203                        | 20991231                      |
| INSULIN                   | 1718605           | Clinical Drug      | Insulin Glargine 100 UNT/ML / Lixisenatide 0.033 MG/ML Pen Injector | 1859001            | 20170103                        | 20991231                      |
| INSULIN                   | 19078559          | Clinical Drug      | Insulin Glargine 100 UNT/ML Injectable Solution                     | 311041             | 19700101                        | 20991231                      |
| INSULIN                   | 42902742          | Clinical Drug      | Insulin Glargine 100 UNT/ML Pen Injector                            | 1359855            | 20121203                        | 20991231                      |
| INSULIN                   | 46221558          | Clinical Drug      | Insulin Glargine 300 UNT/ML Pen Injector                            | 1604545            | 20150504                        | 20991231                      |
| INSULIN                   | 46233977          | Clinical Drug      | Insulin Lispro 100 UNT/ML Cartridge                                 | 1652647            | 20150706                        | 20991231                      |
| INSULIN                   | 19058398          | Clinical Drug      | Insulin Lispro 100 UNT/ML Injectable Solution                       | 242120             | 19700101                        | 20991231                      |
| INSULIN                   | 46233971          | Clinical Drug      | Insulin Lispro 100 UNT/ML Pen Injector                              | 1652641            | 20150706                        | 20991231                      |
| INSULIN                   | 42902554          | Clinical Drug      | Insulin Lispro 100 UNT/ML Prefilled Syringe                         | 1359667            | 20121203                        | 20150705                      |
| INSULIN                   | 46233949          | Clinical Drug      | Insulin Lispro 200 UNT/ML Pen Injector                              | 1652243            | 20150706                        | 20991231                      |
| INSULIN                   | 35602718          | Clinical Drug Comp | insulin degludec 100 UNT/ML                                         | 1670008            | 20160502                        | 20991231                      |
| INSULIN                   | 35602728          | Clinical Drug Comp | insulin degludec 200 UNT/ML                                         | 1670020            | 20160502                        | 20991231                      |
| INSULIN                   | 793405            | Clinical Drug Comp | insulin degludec 70 UNT/ML                                          | 1994307            | 20180205                        | 20991231                      |
| INSULIN                   | 46221552          | Clinical Drug Comp | Insulin Glargine 300 UNT/ML                                         | 1604538            | 20150504                        | 20991231                      |
| INSULIN                   | 19095211          | Clinical Drug Comp | Insulin Lispro 100 UNT/ML                                           | 343076             | 19700101                        | 20991231                      |
| INSULIN                   | 46233943          | Clinical Drug Comp | Insulin Lispro 200 UNT/ML                                           | 1652237            | 20150706                        | 20991231                      |
| INSULIN                   | 1718705           | Clinical Drug Form | insulin degludec / liraglutide Pen Injector                         | 1860166            | 20170103                        | 20991231                      |
| INSULIN                   | 35602719          | Clinical Drug Form | insulin degludec Pen Injector                                       | 1670010            | 20160502                        | 20991231                      |
| INSULIN                   | 40056632          | Clinical Drug Form | insulin detemir Injectable Solution                                 | 484321             | 19700101                        | 20991231                      |
| INSULIN                   | 46234190          | Clinical Drug Form | insulin detemir Pen Injector                                        | 1654190            | 20150706                        | 20991231                      |
| INSULIN                   | 40141755          | Clinical Drug Form | insulin detemir Prefilled Syringe                                   | 727836             | 20070902                        | 20160311                      |
| INSULIN                   | 40159979          | Clinical Drug Form | insulin detemir Prefilled Syringe                                   | 847238             | 20090503                        | 20150705                      |
| INSULIN                   | 1718598           | Clinical Drug Form | Insulin Glargine / Lixisenatide Pen Injector                        | 1858993            | 20170103                        | 20991231                      |
| INSULIN                   | 40051347          | Clinical Drug Form | Insulin Glargine Injectable Solution                                | 378864             | 19700101                        | 20991231                      |
| INSULIN                   | 46234097          | Clinical Drug Form | Insulin Glargine Pen Injector                                       | 1653497            | 20150706                        | 20991231                      |
| INSULIN                   | 40159317          | Clinical Drug Form | Insulin Glargine Prefilled Syringe                                  | 847229             | 20090503                        | 20150705                      |
| INSULIN                   | 46233973          | Clinical Drug Form | Insulin Lispro Cartridge                                            | 1652643            | 20150706                        | 20991231                      |
| INSULIN                   | 40052088          | Clinical Drug Form | Insulin Lispro Injectable Solution                                  | 378841             | 19700101                        | 20991231                      |
| INSULIN                   | 46233944          | Clinical Drug Form | Insulin Lispro Pen Injector                                         | 1652238            | 20150706                        | 20991231                      |
| INSULIN                   | 40159322          | Clinical Drug Form | Insulin Lispro Prefilled Syringe                                    | 847206             | 20090503                        | 20150705                      |
| INSULIN                   | 19122121          | Ingredient         | Insulin                                                             | 5856               | 19700101                        | 20160501                      |
| INSULIN                   | 35605670          | Ingredient         | insulin argine                                                      | 1740938            | 20160502                        | 20991231                      |
| INSULIN                   | 35602717          | Ingredient         | insulin degludec                                                    | 1670007            | 20160502                        | 20991231                      |
| INSULIN                   | 40056629          | Ingredient         | insulin detemir                                                     | 484319             | 19700101                        | 20050723                      |

| Broader Drug Class | Concept ID | Class Type          | Trade or Brand Name                                                                                                        | RX CUI Code | Valid Code | Start Date of Valid Code | End Date of Valid Code |
|--------------------|------------|---------------------|----------------------------------------------------------------------------------------------------------------------------|-------------|------------|--------------------------|------------------------|
| INSULIN            | 35604829   | Ingredient          | insulin-like growth factor 2                                                                                               | 1728770     | 20160502   |                          | 20991231               |
| INSULIN            | 40220515   | Ingredient          | long-(ARG3)insulin-like growth factor-I                                                                                    | 1809244     | 20161003   |                          | 20991231               |
| INSULIN            | 46221557   | Quant Branded Drug  | 1.5 ML Insulin Glargine 300 UNT/ML Pen Injector [Toujeo]<br>3 ML insulin degludec 100 UNT/ML / liraglutide 3.6 MG/ML Pen   | 1604544     | 20150504   |                          | 20991231               |
| INSULIN            | 1718711    | Quant Branded Drug  | Injector [Xultophy]                                                                                                        | 1860172     | 20170103   |                          | 20991231               |
| INSULIN            | 35602724   | Quant Branded Drug  | 3 ML insulin degludec 100 UNT/ML Pen Injector [Tresiba]                                                                    | 1670016     | 20160502   |                          | 20991231               |
| INSULIN            | 35602731   | Quant Branded Drug  | 3 ML insulin degludec 200 UNT/ML Pen Injector [Tresiba]<br>3 ML Insulin Glargine 100 UNT/ML / Lixisenatide 0.033 MG/ML Pen | 1670023     | 20160502   |                          | 20991231               |
| INSULIN            | 1718604    | Quant Branded Drug  | Injector [Soliqua]                                                                                                         | 1859000     | 20170103   |                          | 20991231               |
| INSULIN            | 35604094   | Quant Branded Drug  | 3 ML Insulin Glargine 100 UNT/ML Pen Injector [Basaglar]                                                                   | 1736863     | 20160502   |                          | 20991231               |
| INSULIN            | 42544060   | Quant Branded Drug  | 3 ML Insulin Glargine 300 UNT/ML Pen Injector [Toujeo]                                                                     | 2002420     | 20180507   |                          | 20991231               |
| INSULIN            | 46233976   | Quant Branded Drug  | 3 ML Insulin Lispro 100 UNT/ML Cartridge [Humalog]                                                                         | 1652646     | 20150706   |                          | 20991231               |
| INSULIN            | 793225     | Quant Branded Drug  | 3 ML Insulin Lispro 100 UNT/ML Pen Injector [Admelog]                                                                      | 1992171     | 20180205   |                          | 20991231               |
| INSULIN            | 46233970   | Quant Branded Drug  | 3 ML Insulin Lispro 100 UNT/ML Pen Injector [Humalog]                                                                      | 1652640     | 20150706   |                          | 20991231               |
| INSULIN            | 19135267   | Quant Branded Drug  | 3 ML Insulin Lispro 100 UNT/ML Prefilled Syringe [Humalog]                                                                 | 847209      | 20090503   |                          | 20150705               |
| INSULIN            | 46233948   | Quant Branded Drug  | 3 ML Insulin Lispro 200 UNT/ML Pen Injector [Humalog]                                                                      | 1652242     | 20150706   |                          | 20991231               |
| INSULIN            | 46221553   | Quant Clinical Drug | 1.5 ML Insulin Glargine 300 UNT/ML Pen Injector                                                                            | 1604539     | 20150504   |                          | 20991231               |
| INSULIN            | 19135319   | Quant Clinical Drug | 1.5 ML Insulin Lispro 100 UNT/ML Prefilled Syringe<br>3 ML insulin degludec 100 UNT/ML / liraglutide 3.6 MG/ML Pen         | 847416      | 20090503   |                          | 20150705               |
| INSULIN            | 1718706    | Quant Clinical Drug | Injector                                                                                                                   | 1860167     | 20170103   |                          | 20991231               |
| INSULIN            | 35602720   | Quant Clinical Drug | 3 ML insulin degludec 100 UNT/ML Pen Injector                                                                              | 1670011     | 20160502   |                          | 20991231               |
| INSULIN            | 35602729   | Quant Clinical Drug | 3 ML insulin degludec 200 UNT/ML Pen Injector<br>3 ML Insulin Glargine 100 UNT/ML / Lixisenatide 0.033 MG/ML Pen           | 1670021     | 20160502   |                          | 20991231               |
| INSULIN            | 1718599    | Quant Clinical Drug | Injector                                                                                                                   | 1858995     | 20170103   |                          | 20991231               |
| INSULIN            | 19135276   | Quant Clinical Drug | 3 ML Insulin Glargine 100 UNT/ML Pen Injector                                                                              | 847230      | 20090503   |                          | 20991231               |
| INSULIN            | 42544059   | Quant Clinical Drug | 3 ML Insulin Glargine 300 UNT/ML Pen Injector                                                                              | 2002419     | 20180507   |                          | 20991231               |
| INSULIN            | 46233974   | Quant Clinical Drug | 3 ML Insulin Lispro 100 UNT/ML Cartridge                                                                                   | 1652644     | 20150706   |                          | 20991231               |
| INSULIN            | 46233969   | Quant Clinical Drug | 3 ML Insulin Lispro 100 UNT/ML Pen Injector                                                                                | 1652639     | 20150706   |                          | 20991231               |
| INSULIN            | 19135266   | Quant Clinical Drug | 3 ML Insulin Lispro 100 UNT/ML Prefilled Syringe                                                                           | 847207      | 20090503   |                          | 20150705               |
| INSULIN            | 46233945   | Quant Clinical Drug | 3 ML Insulin Lispro 200 UNT/ML Pen Injector                                                                                | 1652239     | 20150706   |                          | 20991231               |
| MEGL_NATEGLINIDE   | 19045604   | Brand Name          | Starlix                                                                                                                    | 402943      | 19700101   |                          | 20991231               |
| MEGL_NATEGLINIDE   | 36232423   | Branded Dose Group  | Starlix Oral Product                                                                                                       | 1178433     | 20160801   |                          | 20991231               |
| MEGL_NATEGLINIDE   | 36232424   | Branded Dose Group  | Starlix Pill                                                                                                               | 1178434     | 20160801   |                          | 20991231               |
| MEGL_NATEGLINIDE   | 19071495   | Branded Drug        | nateglinide 120 MG Oral Tablet [Starlix]                                                                                   | 284530      | 19700101   |                          | 20991231               |
| MEGL_NATEGLINIDE   | 1502827    | Branded Drug        | nateglinide 60 MG Oral Tablet [Starlix]                                                                                    | 284529      | 19700101   |                          | 20991231               |
| MEGL_NATEGLINIDE   | 19045606   | Branded Drug Comp   | nateglinide 120 MG [Starlix]                                                                                               | 574958      | 20050911   |                          | 20991231               |
| MEGL_NATEGLINIDE   | 19045605   | Branded Drug Comp   | nateglinide 60 MG [Starlix]                                                                                                | 574957      | 20050911   |                          | 20991231               |
| MEGL_NATEGLINIDE   | 40058199   | Branded Drug Form   | nateglinide Oral Tablet [Starlix]                                                                                          | 402944      | 19700101   |                          | 20991231               |
| MEGL_NATEGLINIDE   | 36223777   | Clinical Dose Group | nateglinide Oral Product                                                                                                   | 1158396     | 20160801   |                          | 20991231               |

| <b>Broader Drug Class</b> | <b>Concept ID</b> | <b>Class Type</b>   | <b>Trade or Brand Name</b>                | <b>RX CUI Code</b> | <b>Start Date of Valid Code</b> | <b>End Date of Valid Code</b> |
|---------------------------|-------------------|---------------------|-------------------------------------------|--------------------|---------------------------------|-------------------------------|
| MEGL_NATEGLINIDE          | 36223778          | Clinical Dose Group | nateglinide Pill                          | 1158397            | 20160801                        | 20991231                      |
| MEGL_NATEGLINIDE          | 1502829           | Clinical Drug       | nateglinide 120 MG Oral Tablet            | 311919             | 19700101                        | 20991231                      |
| MEGL_NATEGLINIDE          | 1502873           | Clinical Drug       | nateglinide 180 MG Oral Tablet            | 389139             | 19700101                        | 20991231                      |
| MEGL_NATEGLINIDE          | 19107111          | Clinical Drug       | nateglinide 30 MG Oral Tablet             | 430492             | 19700101                        | 20991231                      |
| MEGL_NATEGLINIDE          | 1502830           | Clinical Drug       | nateglinide 60 MG Oral Tablet             | 314142             | 19700101                        | 20991231                      |
| MEGL_NATEGLINIDE          | 19107110          | Clinical Drug       | nateglinide 90 MG Oral Tablet             | 430491             | 19700101                        | 20991231                      |
| MEGL_NATEGLINIDE          | 19085096          | Clinical Drug Comp  | nateglinide 120 MG                        | 330385             | 19700101                        | 20991231                      |
| MEGL_NATEGLINIDE          | 19102037          | Clinical Drug Comp  | nateglinide 180 MG                        | 393408             | 19700101                        | 20991231                      |
| MEGL_NATEGLINIDE          | 19110957          | Clinical Drug Comp  | nateglinide 30 MG                         | 446631             | 19700101                        | 20991231                      |
| MEGL_NATEGLINIDE          | 19085097          | Clinical Drug Comp  | nateglinide 60 MG                         | 330386             | 19700101                        | 20991231                      |
| MEGL_NATEGLINIDE          | 19110958          | Clinical Drug Comp  | nateglinide 90 MG                         | 446632             | 19700101                        | 20991231                      |
| MEGL_NATEGLINIDE          | 40058198          | Clinical Drug Form  | nateglinide Oral Tablet                   | 374648             | 19700101                        | 20991231                      |
| MEGL_NATEGLINIDE          | 1502826           | Ingredient          | nateglinide                               | 274332             | 19700101                        | 20991231                      |
| MEGL_REPAGLINIDE          | 19054446          | Brand Name          | NovoNorm                                  | 226914             | 19700101                        | 20991231                      |
| MEGL_REPAGLINIDE          | 19078027          | Brand Name          | Prandin                                   | 219335             | 19700101                        | 20991231                      |
| MEGL_REPAGLINIDE          | 36231452          | Branded Dose Group  | NovoNorm Oral Product                     | 1178121            | 20160801                        | 20991231                      |
| MEGL_REPAGLINIDE          | 36231453          | Branded Dose Group  | NovoNorm Pill                             | 1178122            | 20160801                        | 20991231                      |
| MEGL_REPAGLINIDE          | 36240429          | Branded Dose Group  | Prandin Oral Product                      | 1184631            | 20160801                        | 20991231                      |
| MEGL_REPAGLINIDE          | 36240430          | Branded Dose Group  | Prandin Pill                              | 1184632            | 20160801                        | 20991231                      |
| MEGL_REPAGLINIDE          | 19054443          | Branded Drug        | repaglinide 0.5 MG Oral Tablet [NovoNorm] | 226911             | 19700101                        | 20991231                      |
| MEGL_REPAGLINIDE          | 1516770           | Branded Drug        | repaglinide 0.5 MG Oral Tablet [Prandin]  | 213218             | 19700101                        | 20991231                      |
| MEGL_REPAGLINIDE          | 19054444          | Branded Drug        | repaglinide 1 MG Oral Tablet [NovoNorm]   | 226912             | 19700101                        | 20991231                      |
| MEGL_REPAGLINIDE          | 1516771           | Branded Drug        | repaglinide 1 MG Oral Tablet [Prandin]    | 213219             | 19700101                        | 20991231                      |
| MEGL_REPAGLINIDE          | 19054445          | Branded Drug        | repaglinide 2 MG Oral Tablet [NovoNorm]   | 226913             | 19700101                        | 20991231                      |
| MEGL_REPAGLINIDE          | 19047663          | Branded Drug        | repaglinide 2 MG Oral Tablet [Prandin]    | 213220             | 19700101                        | 20991231                      |
| MEGL_REPAGLINIDE          | 19120528          | Branded Drug Comp   | repaglinide 0.5 MG [NovoNorm]             | 574042             | 20050911                        | 20991231                      |
| MEGL_REPAGLINIDE          | 19078028          | Branded Drug Comp   | repaglinide 0.5 MG [Prandin]              | 573136             | 20050911                        | 20991231                      |
| MEGL_REPAGLINIDE          | 19120529          | Branded Drug Comp   | repaglinide 1 MG [NovoNorm]               | 574043             | 20050911                        | 20991231                      |
| MEGL_REPAGLINIDE          | 19078029          | Branded Drug Comp   | repaglinide 1 MG [Prandin]                | 573137             | 20050911                        | 20991231                      |
| MEGL_REPAGLINIDE          | 19120530          | Branded Drug Comp   | repaglinide 2 MG [NovoNorm]               | 574044             | 20050911                        | 20991231                      |
| MEGL_REPAGLINIDE          | 19078030          | Branded Drug Comp   | repaglinide 2 MG [Prandin]                | 573138             | 20050911                        | 20991231                      |
| MEGL_REPAGLINIDE          | 40098706          | Branded Drug Form   | repaglinide Oral Tablet [NovoNorm]        | 402959             | 19700101                        | 20991231                      |
| MEGL_REPAGLINIDE          | 40098707          | Branded Drug Form   | repaglinide Oral Tablet [Prandin]         | 368289             | 19700101                        | 20991231                      |
| MEGL_REPAGLINIDE          | 36213643          | Clinical Dose Group | repaglinide Oral Product                  | 1157407            | 20160801                        | 20991231                      |
| MEGL_REPAGLINIDE          | 36213644          | Clinical Dose Group | repaglinide Pill                          | 1157408            | 20160801                        | 20991231                      |
| MEGL_REPAGLINIDE          | 19023425          | Clinical Drug       | repaglinide 0.5 MG Oral Tablet            | 200257             | 19700101                        | 20991231                      |
| MEGL_REPAGLINIDE          | 19023424          | Clinical Drug       | repaglinide 1 MG Oral Tablet              | 200256             | 19700101                        | 20991231                      |
| MEGL_REPAGLINIDE          | 19023426          | Clinical Drug       | repaglinide 2 MG Oral Tablet              | 200258             | 19700101                        | 20991231                      |
| MEGL_REPAGLINIDE          | 1516795           | Clinical Drug Comp  | repaglinide 0.5 MG                        | 331433             | 19700101                        | 20991231                      |

| <b>Broader Drug Class</b> | <b>Concept ID</b> | <b>Class Type</b>   | <b>Trade or Brand Name</b>                                                      | <b>RX CUI Code</b> | <b>Start Date of Valid Code</b> | <b>End Date of Valid Code</b> |
|---------------------------|-------------------|---------------------|---------------------------------------------------------------------------------|--------------------|---------------------------------|-------------------------------|
| MEGL_REPAGLINIDE          | 19081914          | Clinical Drug Comp  | repaglinide 1 MG                                                                | 316630             | 19700101                        | 20991231                      |
| MEGL_REPAGLINIDE          | 1516794           | Clinical Drug Comp  | repaglinide 2 MG                                                                | 316631             | 19700101                        | 20991231                      |
| MEGL_REPAGLINIDE          | 40098705          | Clinical Drug Form  | repaglinide Oral Tablet                                                         | 373759             | 19700101                        | 20991231                      |
| MEGL_REPAGLINIDE          | 1516766           | Ingredient          | repaglinide                                                                     | 73044              | 19700101                        | 20991231                      |
| MET_COMBO_EXCL            | 793306            | Branded Drug        | ertugliflozin 2.5 MG / Metformin hydrochloride 1000 MG Oral Tablet [Segluromet] | 1992691            | 20180205                        | 20991231                      |
| MET_COMBO_EXCL            | 793309            | Branded Drug        | ertugliflozin 2.5 MG / Metformin hydrochloride 500 MG Oral Tablet [Segluromet]  | 1992695            | 20180205                        | 20991231                      |
| MET_COMBO_EXCL            | 793313            | Branded Drug        | ertugliflozin 7.5 MG / Metformin hydrochloride 1000 MG Oral Tablet [Segluromet] | 1992700            | 20180205                        | 20991231                      |
| MET_COMBO_EXCL            | 793316            | Branded Drug        | ertugliflozin 7.5 MG / Metformin hydrochloride 500 MG Oral Tablet [Segluromet]  | 1992703            | 20180205                        | 20991231                      |
| MET_COMBO_EXCL            | 40117770          | Branded Drug        | Metformin 500 MG / ropinirole 2 MG Oral Tablet [avandamet]                      | 541778             | 20050911                        | 20080127                      |
| MET_COMBO_EXCL            | 793302            | Branded Drug Comp   | ertugliflozin 2.5 MG / Metformin hydrochloride 1000 MG [Segluromet]             | 1992687            | 20180205                        | 20991231                      |
| MET_COMBO_EXCL            | 793308            | Branded Drug Comp   | ertugliflozin 2.5 MG / Metformin hydrochloride 500 MG [Segluromet]              | 1992694            | 20180205                        | 20991231                      |
| MET_COMBO_EXCL            | 793312            | Branded Drug Comp   | ertugliflozin 7.5 MG / Metformin hydrochloride 1000 MG [Segluromet]             | 1992699            | 20180205                        | 20991231                      |
| MET_COMBO_EXCL            | 793315            | Branded Drug Comp   | ertugliflozin 7.5 MG / Metformin hydrochloride 500 MG [Segluromet]              | 1992702            | 20180205                        | 20991231                      |
| MET_COMBO_EXCL            | 40117771          | Branded Drug Comp   | Metformin 500 MG / ropinirole 2 MG [avandamet]                                  | 541776             | 20050911                        | 20080127                      |
| MET_COMBO_EXCL            | 793303            | Branded Drug Form   | ertugliflozin / Metformin Oral Tablet [Segluromet]                              | 1992688            | 20180205                        | 20991231                      |
| MET_COMBO_EXCL            | 40117726          | Branded Drug Form   | Metformin / ropinirole Oral Tablet [avandamet]                                  | 541777             | 20050911                        | 20051204                      |
| MET_COMBO_EXCL            | 36214817          | Clinical Dose Group | Chlorpropamide / Metformin Oral Product                                         | 1155467            | 20160801                        | 20991231                      |
| MET_COMBO_EXCL            | 36214818          | Clinical Dose Group | Chlorpropamide / Metformin Pill                                                 | 1155468            | 20160801                        | 20991231                      |
| MET_COMBO_EXCL            | 793297            | Clinical Dose Group | ertugliflozin / Metformin Oral Product                                          | 1992681            | 20180205                        | 20991231                      |
| MET_COMBO_EXCL            | 793298            | Clinical Dose Group | ertugliflozin / Metformin Pill                                                  | 1992682            | 20180205                        | 20991231                      |
| MET_COMBO_EXCL            | 36223135          | Clinical Dose Group | Metformin / ropinirole Oral Product                                             | 1161601            | 20160801                        | 20991231                      |
| MET_COMBO_EXCL            | 36223136          | Clinical Dose Group | Metformin / ropinirole Pill                                                     | 1161602            | 20160801                        | 20991231                      |
| MET_COMBO_EXCL            | 19060469          | Clinical Drug       | Chlorpropamide 125 MG / Metformin 400 MG Oral Tablet                            | 246522             | 19700101                        | 20991231                      |
| MET_COMBO_EXCL            | 19107624          | Clinical Drug       | Chlorpropamide 125 MG / Metformin 500 MG Oral Tablet                            | 432780             | 19700101                        | 20991231                      |
| MET_COMBO_EXCL            | 19107377          | Clinical Drug       | Chlorpropamide 125 MG / Metformin 513 MG Oral Tablet                            | 432366             | 19700101                        | 20991231                      |
| MET_COMBO_EXCL            | 793300            | Clinical Drug       | ertugliflozin 2.5 MG / Metformin hydrochloride 1000 MG Oral Tablet              | 1992685            | 20180205                        | 20991231                      |
| MET_COMBO_EXCL            | 793307            | Clinical Drug       | ertugliflozin 2.5 MG / Metformin hydrochloride 500 MG Oral Tablet               | 1992693            | 20180205                        | 20991231                      |
| MET_COMBO_EXCL            | 793311            | Clinical Drug       | ertugliflozin 7.5 MG / Metformin hydrochloride 1000 MG Oral Tablet              | 1992698            | 20180205                        | 20991231                      |
| MET_COMBO_EXCL            | 793314            | Clinical Drug       | ertugliflozin 7.5 MG / Metformin hydrochloride 500 MG Oral Tablet               | 1992701            | 20180205                        | 20991231                      |

| <b>Broader Drug Class</b> | <b>Concept ID</b> | <b>Class Type</b>   | <b>Trade or Brand Name</b>                                                                     | <b>RX CUI Code</b> | <b>Start Date of Valid Code</b> | <b>End Date of Valid Code</b> |
|---------------------------|-------------------|---------------------|------------------------------------------------------------------------------------------------|--------------------|---------------------------------|-------------------------------|
| MET_COMBO_EXCL            | 19113780          | Clinical Drug       | Metformin 500 MG / ropinirole 2 MG Oral Tablet                                                 | 541775             | 20050911                        | 20991231                      |
| MET_COMBO_EXCL            | 40030438          | Clinical Drug Form  | Chlorpropamide / Metformin Oral Tablet                                                         | 371466             | 19700101                        | 20991231                      |
| MET_COMBO_EXCL            | 793299            | Clinical Drug Form  | ertugliflozin / Metformin Oral Tablet                                                          | 1992683            | 20180205                        | 20991231                      |
| MET_COMBO_EXCL            | 40117725          | Clinical Drug Form  | Metformin / ropinirole Oral Tablet                                                             | 541774             | 20050911                        | 20991231                      |
| METDPP_MET ALOG           | 43525478          | Brand Name          | Kazano                                                                                         | 1372692            | 20130401                        | 20991231                      |
| METDPP_MET ALOG           | 43013689          | Brand Name          | Kazano 12.5/1000                                                                               | 1368386            | 20130304                        | 20130331                      |
| METDPP_MET ALOG           | 43013690          | Brand Name          | Kazano 12.5/500                                                                                | 1368393            | 20130304                        | 20130331                      |
| METDPP_MET ALOG           | 36246267          | Branded Dose Group  | Kazano Oral Product                                                                            | 1368396            | 20160801                        | 20991231                      |
| METDPP_MET ALOG           | 36246268          | Branded Dose Group  | Kazano Pill                                                                                    | 1368397            | 20160801                        | 20991231                      |
| METDPP_MET ALOG           | 43013897          | Branded Drug        | alogliptin 12.5 MG / Metformin hydrochloride 1000 MG Oral Tablet [Kazano]                      | 1368391            | 20130304                        | 20991231                      |
| METDPP_MET ALOG           | 43013900          | Branded Drug        | alogliptin 12.5 MG / Metformin hydrochloride 500 MG Oral Tablet [Kazano]                       | 1368398            | 20130304                        | 20991231                      |
| METDPP_MET ALOG           | 43013898          | Branded Drug Comp   | alogliptin 12.5 MG / Metformin hydrochloride 1000 MG [Kazano]                                  | 1368387            | 20130304                        | 20991231                      |
| METDPP_MET ALOG           | 43013901          | Branded Drug Comp   | alogliptin 12.5 MG / Metformin hydrochloride 500 MG [Kazano]                                   | 1368394            | 20130304                        | 20991231                      |
| METDPP_MET ALOG           | 43013886          | Branded Drug Form   | alogliptin / Metformin Oral Tablet [Kazano 12.5/1000]                                          | 1368388            | 20130304                        | 20130331                      |
| METDPP_MET ALOG           | 43013887          | Branded Drug Form   | alogliptin / Metformin Oral Tablet [Kazano]                                                    | 1368395            | 20130304                        | 20991231                      |
| METDPP_MET ALOG           | 36246265          | Clinical Dose Group | alogliptin / Metformin Oral Product                                                            | 1368381            | 20160801                        | 20991231                      |
| METDPP_MET ALOG           | 36246266          | Clinical Dose Group | alogliptin / Metformin Pill                                                                    | 1368382            | 20160801                        | 20991231                      |
| METDPP_MET ALOG           | 43013896          | Clinical Drug       | alogliptin 12.5 MG / Metformin hydrochloride 1000 MG Oral Tablet                               | 1368385            | 20130304                        | 20991231                      |
| METDPP_MET ALOG           | 43013899          | Clinical Drug       | alogliptin 12.5 MG / Metformin hydrochloride 500 MG Oral Tablet                                | 1368392            | 20130304                        | 20991231                      |
| METDPP_MET ALOG           | 43013885          | Clinical Drug Form  | alogliptin / Metformin Oral Tablet                                                             | 1368383            | 20130304                        | 20991231                      |
| METDPP_MET LINA           | 43525492          | Brand Name          | Jentadueto                                                                                     | 1372706            | 20130401                        | 20991231                      |
| METDPP_MET LINA           | 42705858          | Brand Name          | Jentadueto 2.5/1000                                                                            | 1243021            | 20120507                        | 20130331                      |
| METDPP_MET LINA           | 42705861          | Brand Name          | Jentadueto 2.5/500                                                                             | 1243028            | 20120507                        | 20130331                      |
| METDPP_MET LINA           | 42705864          | Brand Name          | Jentadueto 2.5/850                                                                             | 1243035            | 20120507                        | 20130331                      |
| METDPP_MET LINA           | 36238286          | Branded Dose Group  | Jentadueto Oral Product                                                                        | 1243038            | 20160801                        | 20991231                      |
| METDPP_MET LINA           | 36238287          | Branded Dose Group  | Jentadueto Pill                                                                                | 1243039            | 20160801                        | 20991231                      |
| METDPP_MET LINA           | 36249795          | Branded Drug        | Linagliptin 2.5 MG / Metformin hydrochloride 1000 MG Extended Release Oral Tablet [Jentadueto] | 1796093            | 20160801                        | 20991231                      |
| METDPP_MET LINA           | 42708087          | Branded Drug        | Linagliptin 2.5 MG / Metformin hydrochloride 1000 MG Oral Tablet [Jentadueto]                  | 1243026            | 20120507                        | 20991231                      |
| METDPP_MET LINA           | 42708089          | Branded Drug        | Linagliptin 2.5 MG / Metformin hydrochloride 500 MG Oral Tablet [Jentadueto]                   | 1243033            | 20120507                        | 20991231                      |
| METDPP_MET LINA           | 42708091          | Branded Drug        | Linagliptin 2.5 MG / Metformin hydrochloride 850 MG Oral Tablet [Jentadueto]                   | 1243040            | 20120507                        | 20991231                      |
| METDPP_MET LINA           | 36249800          | Branded Drug        | Linagliptin 5 MG / Metformin hydrochloride 1000 MG Extended Release Oral Tablet [Jentadueto]   | 1796098            | 20160801                        | 20991231                      |

| Broader Drug Class | Concept ID | Class Type          | Trade or Brand Name                                                                                  | RX CUI Code | Start Date of Valid Code | End Date of Valid Code |
|--------------------|------------|---------------------|------------------------------------------------------------------------------------------------------|-------------|--------------------------|------------------------|
| METDPP_MET_LINA    | 42705859   | Branded Drug Comp   | Linagliptin 2.5 MG / Metformin hydrochloride 1000 MG [Jentadueto]                                    | 1243022     | 20120507                 | 20991231               |
| METDPP_MET_LINA    | 42705862   | Branded Drug Comp   | Linagliptin 2.5 MG / Metformin hydrochloride 500 MG [Jentadueto]                                     | 1243029     | 20120507                 | 20991231               |
| METDPP_MET_LINA    | 42705865   | Branded Drug Comp   | Linagliptin 2.5 MG / Metformin hydrochloride 850 MG [Jentadueto]                                     | 1243036     | 20120507                 | 20991231               |
| METDPP_MET_LINA    | 36249797   | Branded Drug Comp   | Linagliptin 5 MG / Metformin hydrochloride 1000 MG [Jentadueto]                                      | 1796095     | 20160801                 | 20991231               |
| METDPP_MET_LINA    | 36249792   | Branded Drug Form   | Linagliptin / Metformin Extended Release Oral Tablet [Jentadueto]                                    | 1796090     | 20160801                 | 20991231               |
| METDPP_MET_LINA    | 42705860   | Branded Drug Form   | Linagliptin / Metformin Oral Tablet [Jentadueto 2.5/1000]                                            | 1243023     | 20120507                 | 20130331               |
| METDPP_MET_LINA    | 42705863   | Branded Drug Form   | Linagliptin / Metformin Oral Tablet [Jentadueto 2.5/500]                                             | 1243030     | 20120507                 | 20130331               |
| METDPP_MET_LINA    | 42705866   | Branded Drug Form   | Linagliptin / Metformin Oral Tablet [Jentadueto]                                                     | 1243037     | 20120507                 | 20991231               |
| METDPP_MET_LINA    | 36238284   | Clinical Dose Group | Linagliptin / Metformin Oral Product                                                                 | 1243016     | 20160801                 | 20991231               |
| METDPP_MET_LINA    | 36238285   | Clinical Dose Group | Linagliptin / Metformin Pill                                                                         | 1243017     | 20160801                 | 20991231               |
| METDPP_MET_LINA    | 36249794   | Clinical Drug       | Linagliptin 2.5 MG / Metformin hydrochloride 1000 MG Extended Release Oral Tablet                    | 1796092     | 20160801                 | 20991231               |
| METDPP_MET_LINA    | 42708086   | Clinical Drug       | Linagliptin 2.5 MG / Metformin hydrochloride 1000 MG Oral Tablet                                     | 1243020     | 20120507                 | 20991231               |
| METDPP_MET_LINA    | 42708088   | Clinical Drug       | Linagliptin 2.5 MG / Metformin hydrochloride 500 MG Oral Tablet                                      | 1243027     | 20120507                 | 20991231               |
| METDPP_MET_LINA    | 42708090   | Clinical Drug       | Linagliptin 2.5 MG / Metformin hydrochloride 850 MG Oral Tablet                                      | 1243034     | 20120507                 | 20991231               |
| METDPP_MET_LINA    | 36249799   | Clinical Drug       | Linagliptin 5 MG / Metformin hydrochloride 1000 MG Extended Release Oral Tablet                      | 1796097     | 20160801                 | 20991231               |
| METDPP_MET_LINA    | 36249790   | Clinical Drug Form  | Linagliptin / Metformin Extended Release Oral Tablet                                                 | 1796088     | 20160801                 | 20991231               |
| METDPP_MET_LINA    | 42705857   | Clinical Drug Form  | Linagliptin / Metformin Oral Tablet                                                                  | 1243018     | 20120507                 | 20991231               |
| METDPP_MET_LINA    | 36249793   | Quant Branded Drug  | 24 HR Linagliptin 2.5 MG / Metformin hydrochloride 1000 MG Extended Release Oral Tablet [Jentadueto] | 1796091     | 20160801                 | 20991231               |
| METDPP_MET_LINA    | 36249798   | Quant Branded Drug  | 24 HR Linagliptin 5 MG / Metformin hydrochloride 1000 MG Extended Release Oral Tablet [Jentadueto]   | 1796096     | 20160801                 | 20991231               |
| METDPP_MET_LINA    | 36249791   | Quant Clinical Drug | 24 HR Linagliptin 2.5 MG / Metformin hydrochloride 1000 MG Extended Release Oral Tablet              | 1796089     | 20160801                 | 20991231               |
| METDPP_MET_LINA    | 36249796   | Quant Clinical Drug | 24 HR Linagliptin 5 MG / Metformin hydrochloride 1000 MG Extended Release Oral Tablet                | 1796094     | 20160801                 | 20991231               |
| METDPP_MET_SAXA    | 43525516   | Brand Name          | Kombiglyze                                                                                           | 1372730     | 20130401                 | 20991231               |
| METDPP_MET_SAXA    | 40231170   | Brand Name          | Kombiglyze 2.5/1000                                                                                  | 1043564     | 20101205                 | 20130331               |
| METDPP_MET_SAXA    | 40231171   | Brand Name          | Kombiglyze 5/1000                                                                                    | 1043571     | 20101205                 | 20130331               |
| METDPP_MET_SAXA    | 40231172   | Brand Name          | Kombiglyze 5/500                                                                                     | 1043579     | 20101205                 | 20130331               |
| METDPP_MET_SAXA    | 36236481   | Branded Dose Group  | Kombiglyze Oral Product                                                                              | 1172861     | 20160801                 | 20991231               |
| METDPP_MET_SAXA    | 36236480   | Branded Dose Group  | Kombiglyze Pill                                                                                      | 1172860     | 20160801                 | 20991231               |
| METDPP_MET_SAXA    | 40231392   | Branded Drug        | Metformin hydrochloride 1000 MG / saxagliptin 2.5 MG Extended Release Oral Tablet [Kombiglyze]       | 1043569     | 20101205                 | 20991231               |
| METDPP_MET_SAXA    | 40231395   | Branded Drug        | Metformin hydrochloride 1000 MG / saxagliptin 5 MG Extended Release Oral Tablet [Kombiglyze]         | 1043576     | 20101205                 | 20991231               |

| Broader Drug Class | Concept ID | Class Type          | Trade or Brand Name                                                                                  | RX CUI Code | Start Date of Valid Code | End Date of Valid Code |
|--------------------|------------|---------------------|------------------------------------------------------------------------------------------------------|-------------|--------------------------|------------------------|
| METDPP_MET_SAXA    | 40231403   | Branded Drug        | Metformin hydrochloride 500 MG / saxagliptin 5 MG Extended Release Oral Tablet [Kombiglyze]          | 1043584     | 20101205                 | 20991231               |
| METDPP_MET_SAXA    | 40231393   | Branded Drug Comp   | Metformin hydrochloride 1000 MG / saxagliptin 2.5 MG [Kombiglyze]                                    | 1043565     | 20101205                 | 20991231               |
| METDPP_MET_SAXA    | 40231396   | Branded Drug Comp   | Metformin hydrochloride 1000 MG / saxagliptin 5 MG [Kombiglyze]                                      | 1043572     | 20101205                 | 20991231               |
| METDPP_MET_SAXA    | 40231404   | Branded Drug Comp   | Metformin hydrochloride 500 MG / saxagliptin 5 MG [Kombiglyze]                                       | 1043580     | 20101205                 | 20991231               |
| METDPP_MET_SAXA    | 40231388   | Branded Drug Form   | Metformin / saxagliptin Extended Release Oral Tablet [Kombiglyze]                                    | 1043566     | 20101205                 | 20991231               |
| METDPP_MET_SAXA    | 40231389   | Branded Drug Form   | Metformin / saxagliptin Extended Release Tablet [Kombiglyze 5/1000]                                  | 1043573     | 20101205                 | 20130331               |
| METDPP_MET_SAXA    | 40231390   | Branded Drug Form   | Metformin / saxagliptin Extended Release Tablet [Kombiglyze 5/500]                                   | 1043581     | 20101205                 | 20130331               |
| METDPP_MET_SAXA    | 36223139   | Clinical Dose Group | Metformin / saxagliptin Oral Product                                                                 | 1161605     | 20160801                 | 20991231               |
| METDPP_MET_SAXA    | 36223140   | Clinical Dose Group | Metformin / saxagliptin Pill                                                                         | 1161606     | 20160801                 | 20991231               |
| METDPP_MET_SAXA    | 40231391   | Clinical Drug       | Metformin hydrochloride 1000 MG / saxagliptin 2.5 MG Extended Release Oral Tablet                    | 1043568     | 20101205                 | 20991231               |
| METDPP_MET_SAXA    | 40231394   | Clinical Drug       | Metformin hydrochloride 1000 MG / saxagliptin 5 MG Extended Release Oral Tablet                      | 1043575     | 20101205                 | 20991231               |
| METDPP_MET_SAXA    | 40231402   | Clinical Drug       | Metformin hydrochloride 500 MG / saxagliptin 5 MG Extended Release Oral Tablet                       | 1043583     | 20101205                 | 20991231               |
| METDPP_MET_SAXA    | 40231387   | Clinical Drug Form  | Metformin / saxagliptin Extended Release Oral Tablet                                                 | 1043561     | 20101205                 | 20991231               |
| METDPP_MET_SAXA    | 40229046   | Quant Branded Drug  | 24 HR Metformin hydrochloride 1000 MG / saxagliptin 2.5 MG Extended Release Oral Tablet [Kombiglyze] | 1043567     | 20101205                 | 20991231               |
| METDPP_MET_SAXA    | 40229048   | Quant Branded Drug  | 24 HR Metformin hydrochloride 1000 MG / saxagliptin 5 MG Extended Release Oral Tablet [Kombiglyze]   | 1043574     | 20101205                 | 20991231               |
| METDPP_MET_SAXA    | 40229050   | Quant Branded Drug  | 24 HR Metformin hydrochloride 500 MG / saxagliptin 5 MG Extended Release Oral Tablet [Kombiglyze]    | 1043582     | 20101205                 | 20991231               |
| METDPP_MET_SAXA    | 40229045   | Quant Clinical Drug | 24 HR Metformin hydrochloride 1000 MG / saxagliptin 2.5 MG Extended Release Oral Tablet              | 1043563     | 20101205                 | 20991231               |
| METDPP_MET_SAXA    | 40229047   | Quant Clinical Drug | 24 HR Metformin hydrochloride 1000 MG / saxagliptin 5 MG Extended Release Oral Tablet                | 1043570     | 20101205                 | 20991231               |
| METDPP_MET_SAXA    | 40229049   | Quant Clinical Drug | 24 HR Metformin hydrochloride 500 MG / saxagliptin 5 MG Extended Release Oral Tablet                 | 1043578     | 20101205                 | 20991231               |
| METDPP_MET_SITA    | 43525524   | Brand Name          | Janumet                                                                                              | 1372738     | 20130401                 | 20991231               |
| METDPP_MET_SITA    | 19126321   | Brand Name          | Janumet                                                                                              | 704929      | 20070527                 | 20160311               |
| METDPP_MET_SITA    | 42705989   | Brand Name          | Janumet 100/1000                                                                                     | 1243828     | 20120507                 | 20130331               |
| METDPP_MET_SITA    | 19022235   | Brand Name          | Janumet 50 mg/1000 mg                                                                                | 757601      | 20080302                 | 20130331               |
| METDPP_MET_SITA    | 19022237   | Brand Name          | Janumet 50 mg/500 mg                                                                                 | 757605      | 20080302                 | 20130331               |
| METDPP_MET_SITA    | 36221230   | Branded Dose Group  | Janumet Oral Product                                                                                 | 1167810     | 20160801                 | 20991231               |



| <b>Broader Drug Class</b> | <b>Concept ID</b> | <b>Class Type</b>   | <b>Trade or Brand Name</b>                                                                  | <b>RX CUI Code</b> | <b>Start Date of Valid Code</b> | <b>End Date of Valid Code</b> |
|---------------------------|-------------------|---------------------|---------------------------------------------------------------------------------------------|--------------------|---------------------------------|-------------------------------|
| METDPP_MET_SITA           | 36221231          | Branded Dose Group  | Janumet Pill                                                                                | 1167811            | 20160801                        | 20991231                      |
| METDPP_MET_SITA           | 19129150          | Branded Drug        | Metformin 1000 MG / sitagliptin 50 MG Oral Tablet [Janumet 50 mg/1000 mg]                   | 757604             | 20080302                        | 20090905                      |
| METDPP_MET_SITA           | 40139596          | Branded Drug        | Metformin 1000 MG / sitagliptin 50 MG Oral Tablet [Janumet]                                 | 705136             | 20070527                        | 20081109                      |
| METDPP_MET_SITA           | 19129152          | Branded Drug        | Metformin 500 MG / sitagliptin 50 MG Oral Tablet [Janumet]                                  | 757608             | 20080302                        | 20090905                      |
| METDPP_MET_SITA           | 40139598          | Branded Drug        | Metformin 500 MG / sitagliptin 50 MG Oral Tablet [Janumet]                                  | 705138             | 20070527                        | 20081109                      |
| METDPP_MET_SITA           | 40143331          | Branded Drug        | Metformin 500 MG / sitagliptin 64.3 MG Oral Tablet [Janumet]                                | 748765             | 20071230                        | 20081109                      |
| METDPP_MET_SITA           | 42708169          | Branded Drug        | Metformin hydrochloride 1000 MG / sitagliptin 100 MG Extended Release Oral Tablet [Janumet] | 1243835            | 20120507                        | 20991231                      |
| METDPP_MET_SITA           | 42708173          | Branded Drug        | Metformin hydrochloride 1000 MG / sitagliptin 50 MG Extended Release Oral Tablet [Janumet]  | 1243845            | 20120507                        | 20991231                      |
| METDPP_MET_SITA           | 40164892          | Branded Drug        | Metformin hydrochloride 1000 MG / sitagliptin 50 MG Oral Tablet [Janumet]                   | 861771             | 20090906                        | 20991231                      |
| METDPP_MET_SITA           | 42708177          | Branded Drug        | Metformin hydrochloride 500 MG / sitagliptin 50 MG Extended Release Oral Tablet [Janumet]   | 1243850            | 20120507                        | 20991231                      |
| METDPP_MET_SITA           | 40164923          | Branded Drug        | Metformin hydrochloride 500 MG / sitagliptin 50 MG Oral Tablet [Janumet]                    | 861821             | 20090906                        | 20991231                      |
| METDPP_MET_SITA           | 19129149          | Branded Drug Comp   | Metformin 1000 MG / sitagliptin 50 MG [Janumet 50 mg/1000 mg]                               | 757602             | 20080302                        | 20090905                      |
| METDPP_MET_SITA           | 40139597          | Branded Drug Comp   | Metformin 1000 MG / sitagliptin 50 MG [Janumet]                                             | 705134             | 20070527                        | 20081109                      |
| METDPP_MET_SITA           | 19129151          | Branded Drug Comp   | Metformin 500 MG / sitagliptin 50 MG [Janumet 50 mg/500 mg]                                 | 757606             | 20080302                        | 20090905                      |
| METDPP_MET_SITA           | 40139599          | Branded Drug Comp   | Metformin 500 MG / sitagliptin 50 MG [Janumet]                                              | 705137             | 20070527                        | 20081109                      |
| METDPP_MET_SITA           | 40143332          | Branded Drug Comp   | Metformin 500 MG / sitagliptin 64.3 MG [Janumet]                                            | 748764             | 20071230                        | 20081109                      |
| METDPP_MET_SITA           | 42705990          | Branded Drug Comp   | Metformin hydrochloride 1000 MG / sitagliptin 100 MG [Janumet]                              | 1243829            | 20120507                        | 20991231                      |
| METDPP_MET_SITA           | 40164893          | Branded Drug Comp   | Metformin hydrochloride 1000 MG / sitagliptin 50 MG [Janumet]                               | 861770             | 20090906                        | 20991231                      |
| METDPP_MET_SITA           | 40164924          | Branded Drug Comp   | Metformin hydrochloride 500 MG / sitagliptin 50 MG [Janumet]                                | 861820             | 20090906                        | 20991231                      |
| METDPP_MET_SITA           | 42705992          | Branded Drug Form   | Metformin / sitagliptin Extended Release Oral Tablet [Janumet]                              | 1243839            | 20120507                        | 20991231                      |
| METDPP_MET_SITA           | 42705991          | Branded Drug Form   | Metformin / sitagliptin Extended Release Tablet [Janumet 100/1000]                          | 1243830            | 20120507                        | 20130331                      |
| METDPP_MET_SITA           | 42705993          | Branded Drug Form   | Metformin / sitagliptin Extended Release Tablet [Janumet 50/500]                            | 1243847            | 20120507                        | 20130331                      |
| METDPP_MET_SITA           | 40147000          | Branded Drug Form   | Metformin / sitagliptin Oral Tablet [Janumet 50 mg/500 mg]                                  | 757607             | 20080302                        | 20130331                      |
| METDPP_MET_SITA           | 40139595          | Branded Drug Form   | Metformin / sitagliptin Oral Tablet [Janumet]                                               | 705135             | 20070527                        | 20081109                      |
| METDPP_MET_SITA           | 40146999          | Branded Drug Form   | Metformin / sitagliptin Oral Tablet [Janumet]                                               | 757603             | 20080302                        | 20991231                      |
| METDPP_MET_SITA           | 36223141          | Clinical Dose Group | Metformin / sitagliptin Oral Product                                                        | 1161607            | 20160801                        | 20991231                      |
| METDPP_MET_SITA           | 36223142          | Clinical Dose Group | Metformin / sitagliptin Pill                                                                | 1161608            | 20160801                        | 20991231                      |
| METDPP_MET_SITA           | 19125676          | Clinical Drug       | Metformin 1000 MG / sitagliptin 50 MG Oral Tablet                                           | 700518             | 20070429                        | 20090905                      |
| METDPP_MET_SITA           | 19125675          | Clinical Drug       | Metformin 500 MG / sitagliptin 50 MG Oral Tablet                                            | 700517             | 20070429                        | 20090905                      |
| METDPP_MET_SITA           | 40143330          | Clinical Drug       | Metformin 500 MG / sitagliptin 64.3 MG Oral Tablet                                          | 748763             | 20071230                        | 20081109                      |

| Broader Drug Class | Concept ID | Class Type          | Trade or Brand Name                                                                               | RX CUI Code | Start Date of Valid Code | End Date of Valid Code |
|--------------------|------------|---------------------|---------------------------------------------------------------------------------------------------|-------------|--------------------------|------------------------|
| METDPP_MET_SITA    | 42708168   | Clinical Drug       | Metformin hydrochloride 1000 MG / sitagliptin 100 MG Extended Release Oral Tablet                 | 1243834     | 20120507                 | 20991231               |
| METDPP_MET_SITA    | 42708172   | Clinical Drug       | Metformin hydrochloride 1000 MG / sitagliptin 50 MG Extended Release Oral Tablet                  | 1243844     | 20120507                 | 20991231               |
| METDPP_MET_SITA    | 40164891   | Clinical Drug       | Metformin hydrochloride 1000 MG / sitagliptin 50 MG Oral Tablet                                   | 861769      | 20090906                 | 20991231               |
| METDPP_MET_SITA    | 42708176   | Clinical Drug       | Metformin hydrochloride 500 MG / sitagliptin 50 MG Extended Release Oral Tablet                   | 1243849     | 20120507                 | 20991231               |
| METDPP_MET_SITA    | 40164922   | Clinical Drug       | Metformin hydrochloride 500 MG / sitagliptin 50 MG Oral Tablet                                    | 861819      | 20090906                 | 20991231               |
| METDPP_MET_SITA    | 42705988   | Clinical Drug Form  | Metformin / sitagliptin Extended Release Oral Tablet                                              | 1243826     | 20120507                 | 20991231               |
| METDPP_MET_SITA    | 40139098   | Clinical Drug Form  | Metformin / sitagliptin Oral Tablet                                                               | 700516      | 20070429                 | 20991231               |
| METDPP_MET_SITA    | 42708167   | Quant Branded Drug  | 24 HR Metformin hydrochloride 1000 MG / sitagliptin 100 MG Extended Release Oral Tablet [Janumet] | 1243833     | 20120507                 | 20991231               |
| METDPP_MET_SITA    | 42708171   | Quant Branded Drug  | 24 HR Metformin hydrochloride 1000 MG / sitagliptin 50 MG Extended Release Oral Tablet [Janumet]  | 1243843     | 20120507                 | 20991231               |
| METDPP_MET_SITA    | 42708175   | Quant Branded Drug  | 24 HR Metformin hydrochloride 500 MG / sitagliptin 50 MG Extended Release Oral Tablet [Janumet]   | 1243848     | 20120507                 | 20991231               |
| METDPP_MET_SITA    | 42708166   | Quant Clinical Drug | 24 HR Metformin hydrochloride 1000 MG / sitagliptin 100 MG Extended Release Oral Tablet           | 1243827     | 20120507                 | 20991231               |
| METDPP_MET_SITA    | 42708170   | Quant Clinical Drug | 24 HR Metformin hydrochloride 1000 MG / sitagliptin 50 MG Extended Release Oral Tablet            | 1243842     | 20120507                 | 20991231               |
| METDPP_MET_SITA    | 42708174   | Quant Clinical Drug | 24 HR Metformin hydrochloride 500 MG / sitagliptin 50 MG Extended Release Oral Tablet             | 1243846     | 20120507                 | 20991231               |
| METMEG_MET_REPA    | 43525502   | Brand Name          | PrandiMet                                                                                         | 1372716     | 20130401                 | 20991231               |
| METMEG_MET_REPA    | 19032633   | Brand Name          | PrandiMet 1/500                                                                                   | 805668      | 20080928                 | 20130331               |
| METMEG_MET_REPA    | 19032635   | Brand Name          | PrandiMet 2/500                                                                                   | 805672      | 20080928                 | 20130331               |
| METMEG_MET_REPA    | 36240427   | Branded Dose Group  | PrandiMet Oral Product                                                                            | 1184627     | 20160801                 | 20991231               |
| METMEG_MET_REPA    | 36240428   | Branded Dose Group  | PrandiMet Pill                                                                                    | 1184628     | 20160801                 | 20991231               |
| METMEG_MET_REPA    | 19131949   | Branded Drug        | Metformin 500 MG / repaglinide 1 MG Oral Tablet [PrandiMet 1/500]                                 | 805671      | 20080928                 | 20090905               |
| METMEG_MET_REPA    | 19131951   | Branded Drug        | Metformin 500 MG / repaglinide 2 MG Oral Tablet [PrandiMet 2/500]                                 | 805675      | 20080928                 | 20090905               |
| METMEG_MET_REPA    | 40164908   | Branded Drug        | Metformin hydrochloride 500 MG / repaglinide 1 MG Oral Tablet [PrandiMet]                         | 861789      | 20090906                 | 20991231               |
| METMEG_MET_REPA    | 40164911   | Branded Drug        | Metformin hydrochloride 500 MG / repaglinide 2 MG Oral Tablet [PrandiMet]                         | 861792      | 20090906                 | 20991231               |
| METMEG_MET_REPA    | 19131948   | Branded Drug Comp   | Metformin 500 MG / repaglinide 1 MG [PrandiMet 1/500]                                             | 805669      | 20080928                 | 20090905               |
| METMEG_MET_REPA    | 19131950   | Branded Drug Comp   | Metformin 500 MG / repaglinide 2 MG [PrandiMet 2/500]                                             | 805673      | 20080928                 | 20090905               |
| METMEG_MET_REPA    | 40164909   | Branded Drug Comp   | Metformin hydrochloride 500 MG / repaglinide 1 MG [PrandiMet]                                     | 861788      | 20090906                 | 20991231               |
| METMEG_MET_REPA    | 40164912   | Branded Drug Comp   | Metformin hydrochloride 500 MG / repaglinide 2 MG [PrandiMet]                                     | 861791      | 20090906                 | 20991231               |

| <b>Broader Drug Class</b> | <b>Concept ID</b> | <b>Class Type</b>   | <b>Trade or Brand Name</b>                                               | <b>RX CUI Code</b> | <b>Start Date of Valid Code</b> | <b>End Date of Valid Code</b> |
|---------------------------|-------------------|---------------------|--------------------------------------------------------------------------|--------------------|---------------------------------|-------------------------------|
| METMEG_MET_REPA           | 40153893          | Branded Drug Form   | Metformin / repaglinide Oral Tablet [PrandiMet 2/500]                    | 805674             | 20080928                        | 20130331                      |
| METMEG_MET_REPA           | 40153892          | Branded Drug Form   | Metformin / repaglinide Oral Tablet [PrandiMet]                          | 805670             | 20080928                        | 20991231                      |
| METMEG_MET_REPA           | 36223133          | Clinical Dose Group | Metformin / repaglinide Oral Product                                     | 1161599            | 20160801                        | 20991231                      |
| METMEG_MET_REPA           | 36223134          | Clinical Dose Group | Metformin / repaglinide Pill                                             | 1161600            | 20160801                        | 20991231                      |
| METMEG_MET_REPA           | 19131513          | Clinical Drug       | Metformin 500 MG / repaglinide 1 MG Oral Tablet                          | 802743             | 20080831                        | 20090905                      |
| METMEG_MET_REPA           | 19131514          | Clinical Drug       | Metformin 500 MG / repaglinide 2 MG Oral Tablet                          | 802744             | 20080831                        | 20090905                      |
| METMEG_MET_REPA           | 40164907          | Clinical Drug       | Metformin hydrochloride 500 MG / repaglinide 1 MG Oral Tablet            | 861787             | 20090906                        | 20991231                      |
| METMEG_MET_REPA           | 40164910          | Clinical Drug       | Metformin hydrochloride 500 MG / repaglinide 2 MG Oral Tablet            | 861790             | 20090906                        | 20991231                      |
| METMEG_MET_REPA           | 40153147          | Clinical Drug Form  | Metformin / repaglinide Oral Tablet                                      | 802742             | 20080831                        | 20991231                      |
| METS2G_MET_GLIP           | 19098614          | Brand Name          | Metaglip                                                                 | 352764             | 19700101                        | 20991231                      |
| METS2G_MET_GLIP           | 19048412          | Brand Name          | Metaglip 2.5 MG/250 MG                                                   | 849583             | 20090531                        | 20130331                      |
| METS2G_MET_GLIP           | 19048420          | Brand Name          | Metaglip 2.5 MG/500 MG                                                   | 849591             | 20090531                        | 20130331                      |
| METS2G_MET_GLIP           | 19048414          | Brand Name          | Metaglip 5 MG/500 MG                                                     | 849587             | 20090531                        | 20130331                      |
| METS2G_MET_GLIP           | 36241808          | Branded Dose Group  | Metaglip Oral Product                                                    | 1185049            | 20160801                        | 20991231                      |
| METS2G_MET_GLIP           | 36239236          | Branded Dose Group  | Metaglip Pill                                                            | 1185624            | 20160801                        | 20991231                      |
| METS2G_MET_GLIP           | 1560239           | Branded Drug        | Glipizide 2.5 MG / Metformin 250 MG Oral Tablet [Metaglip 2.5 MG/250 MG] | 849586             | 20090531                        | 20090905                      |
| METS2G_MET_GLIP           | 40044233          | Branded Drug        | Glipizide 2.5 MG / Metformin 250 MG Oral Tablet [metaglip]               | 352302             | 19700101                        | 20090530                      |
| METS2G_MET_GLIP           | 1560241           | Branded Drug        | Glipizide 2.5 MG / Metformin 500 MG Oral Tablet [Metaglip 2.5 MG/500 MG] | 849594             | 20090531                        | 20090905                      |
| METS2G_MET_GLIP           | 40044235          | Branded Drug        | Glipizide 2.5 MG / Metformin 500 MG Oral Tablet [metaglip]               | 352300             | 19700101                        | 20090530                      |
| METS2G_MET_GLIP           | 40165970          | Branded Drug        | Glipizide 2.5 MG / Metformin hydrochloride 250 MG Oral Tablet [Metaglip] | 861733             | 20090906                        | 20991231                      |
| METS2G_MET_GLIP           | 40165973          | Branded Drug        | Glipizide 2.5 MG / Metformin hydrochloride 500 MG Oral Tablet [Metaglip] | 861738             | 20090906                        | 20991231                      |
| METS2G_MET_GLIP           | 19135632          | Branded Drug        | Glipizide 5 MG / Metformin 500 MG Oral Tablet [Metaglip 5 MG/500 MG]     | 849590             | 20090531                        | 20090905                      |
| METS2G_MET_GLIP           | 40044244          | Branded Drug        | Glipizide 5 MG / Metformin 500 MG Oral Tablet [metaglip]                 | 352301             | 19700101                        | 20090530                      |
| METS2G_MET_GLIP           | 40165976          | Branded Drug        | Glipizide 5 MG / Metformin hydrochloride 500 MG Oral Tablet [Metaglip]   | 861742             | 20090906                        | 20991231                      |
| METS2G_MET_GLIP           | 19048413          | Branded Drug Comp   | Glipizide 2.5 MG / Metformin 250 MG [Metaglip 2.5 MG/250 MG]             | 849584             | 20090531                        | 20090905                      |
| METS2G_MET_GLIP           | 40113728          | Branded Drug Comp   | Glipizide 2.5 MG / Metformin 250 MG [metaglip]                           | 575998             | 20050911                        | 20090530                      |
| METS2G_MET_GLIP           | 19048461          | Branded Drug Comp   | Glipizide 2.5 MG / Metformin 500 MG [Metaglip 2.5 MG/500 MG]             | 849592             | 20090531                        | 20090905                      |
| METS2G_MET_GLIP           | 40113729          | Branded Drug Comp   | Glipizide 2.5 MG / Metformin 500 MG [metaglip]                           | 575996             | 20050911                        | 20090530                      |
| METS2G_MET_GLIP           | 40165971          | Branded Drug Comp   | Glipizide 2.5 MG / Metformin hydrochloride 250 MG [Metaglip]             | 861732             | 20090906                        | 20991231                      |
| METS2G_MET_GLIP           | 40165974          | Branded Drug Comp   | Glipizide 2.5 MG / Metformin hydrochloride 500 MG [Metaglip]             | 861737             | 20090906                        | 20991231                      |
| METS2G_MET_GLIP           | 19048415          | Branded Drug Comp   | Glipizide 5 MG / Metformin 500 MG [Metaglip 5 MG/500 MG]                 | 849588             | 20090531                        | 20090905                      |
| METS2G_MET_GLIP           | 40113790          | Branded Drug Comp   | Glipizide 5 MG / Metformin 500 MG [metaglip]                             | 575997             | 20050911                        | 20090530                      |
| METS2G_MET_GLIP           | 40165977          | Branded Drug Comp   | Glipizide 5 MG / Metformin hydrochloride 500 MG [Metaglip]               | 861741             | 20090906                        | 20991231                      |

| <b>Broader Drug Class</b> | <b>Concept ID</b> | <b>Class Type</b>   | <b>Trade or Brand Name</b>                                                  | <b>RX CUI Code</b> | <b>Start Date of Valid Code</b> | <b>End Date of Valid Code</b> |
|---------------------------|-------------------|---------------------|-----------------------------------------------------------------------------|--------------------|---------------------------------|-------------------------------|
| METS2G_MET_GLIP           | 40160875          | Branded Drug Form   | Glipizide / Metformin Oral Tablet [Metaglip 2.5 MG/500 MG]                  | 849593             | 20090531                        | 20130331                      |
| METS2G_MET_GLIP           | 40160876          | Branded Drug Form   | Glipizide / Metformin Oral Tablet [Metaglip 5 MG/500 MG]                    | 849589             | 20090531                        | 20130331                      |
| METS2G_MET_GLIP           | 40044225          | Branded Drug Form   | Glipizide / Metformin Oral Tablet [metaglip]                                | 368567             | 19700101                        | 20090530                      |
| METS2G_MET_GLIP           | 40160874          | Branded Drug Form   | Glipizide / Metformin Oral Tablet [Metaglip]                                | 849585             | 20090531                        | 20991231                      |
| METS2G_MET_GLIP           | 36218765          | Clinical Dose Group | Glipizide / Metformin Oral Product                                          | 1165205            | 20160801                        | 20991231                      |
| METS2G_MET_GLIP           | 36218766          | Clinical Dose Group | Glipizide / Metformin Pill                                                  | 1165206            | 20160801                        | 20991231                      |
| METS2G_MET_GLIP           | 1560237           | Clinical Drug       | Glipizide 2.5 MG / Metformin 250 MG Oral Tablet                             | 351275             | 19700101                        | 20090905                      |
| METS2G_MET_GLIP           | 1560235           | Clinical Drug       | Glipizide 2.5 MG / Metformin 500 MG Oral Tablet                             | 351273             | 19700101                        | 20090905                      |
| METS2G_MET_GLIP           | 40165969          | Clinical Drug       | Glipizide 2.5 MG / Metformin hydrochloride 250 MG Oral Tablet               | 861731             | 20090906                        | 20991231                      |
| METS2G_MET_GLIP           | 40165972          | Clinical Drug       | Glipizide 2.5 MG / Metformin hydrochloride 500 MG Oral Tablet               | 861736             | 20090906                        | 20991231                      |
| METS2G_MET_GLIP           | 1560236           | Clinical Drug       | Glipizide 5 MG / Metformin 500 MG Oral Tablet                               | 351274             | 19700101                        | 20090905                      |
| METS2G_MET_GLIP           | 40165975          | Clinical Drug       | Glipizide 5 MG / Metformin hydrochloride 500 MG Oral Tablet                 | 861740             | 20090906                        | 20991231                      |
| METS2G_MET_GLIP           | 40044224          | Clinical Drug Form  | Glipizide / Metformin Oral Tablet                                           | 378730             | 19700101                        | 20991231                      |
| METS2G_MET_GLYB           | 19005468          | Brand Name          | Glucovance                                                                  | 284743             | 19700101                        | 20991231                      |
| METS2G_MET_GLYB           | 40165988          | Brand Name          | Glucovance 1.25 MG/250 MG                                                   | 861744             | 20090906                        | 20130331                      |
| METS2G_MET_GLYB           | 40165989          | Brand Name          | Glucovance 2.5 MG/500 MG                                                    | 861749             | 20090906                        | 20130331                      |
| METS2G_MET_GLYB           | 40165990          | Brand Name          | Glucovance 5 MG/500 MG                                                      | 861754             | 20090906                        | 20130331                      |
| METS2G_MET_GLYB           | 36235750          | Branded Dose Group  | Glucovance Oral Product                                                     | 1171248            | 20160801                        | 20991231                      |
| METS2G_MET_GLYB           | 36235751          | Branded Dose Group  | Glucovance Pill                                                             | 1171249            | 20160801                        | 20991231                      |
| METS2G_MET_GLYB           | 1559730           | Branded Drug        | Glyburide 1.25 MG / Metformin 250 MG Oral Tablet [Glucovance]               | 284431             | 19700101                        | 20090905                      |
| METS2G_MET_GLYB           | 40165995          | Branded Drug        | Glyburide 1.25 MG / Metformin hydrochloride 250 MG Oral Tablet [Glucovance] | 861747             | 20090906                        | 20991231                      |
| METS2G_MET_GLYB           | 1503322           | Branded Drug        | Glyburide 2.5 MG / Metformin 500 MG Oral Tablet [Glucovance]                | 284432             | 19700101                        | 20090905                      |
| METS2G_MET_GLYB           | 40165998          | Branded Drug        | Glyburide 2.5 MG / Metformin hydrochloride 500 MG Oral Tablet [Glucovance]  | 861752             | 20090906                        | 20991231                      |
| METS2G_MET_GLYB           | 1559731           | Branded Drug        | Glyburide 5 MG / Metformin 500 MG Oral Tablet [Glucovance]                  | 284433             | 19700101                        | 20090905                      |
| METS2G_MET_GLYB           | 40166003          | Branded Drug        | Glyburide 5 MG / Metformin hydrochloride 500 MG Oral Tablet [Glucovance]    | 861757             | 20090906                        | 20991231                      |
| METS2G_MET_GLYB           | 19005469          | Branded Drug Comp   | Glyburide 1.25 MG / Metformin 250 MG [Glucovance]                           | 574869             | 20050911                        | 20090905                      |
| METS2G_MET_GLYB           | 40165996          | Branded Drug Comp   | Glyburide 1.25 MG / Metformin hydrochloride 250 MG [Glucovance]             | 861745             | 20090906                        | 20991231                      |
| METS2G_MET_GLYB           | 19120720          | Branded Drug Comp   | Glyburide 2.5 MG / Metformin 500 MG [Glucovance]                            | 574870             | 20050911                        | 20090905                      |
| METS2G_MET_GLYB           | 40166001          | Branded Drug Comp   | Glyburide 2.5 MG / Metformin hydrochloride 500 MG [Glucovance]              | 861750             | 20090906                        | 20991231                      |
| METS2G_MET_GLYB           | 19005491          | Branded Drug Comp   | Glyburide 5 MG / Metformin 500 MG [Glucovance]                              | 574871             | 20050911                        | 20090905                      |
| METS2G_MET_GLYB           | 40166004          | Branded Drug Comp   | Glyburide 5 MG / Metformin hydrochloride 500 MG [Glucovance]                | 861755             | 20090906                        | 20991231                      |
| METS2G_MET_GLYB           | 40165991          | Branded Drug Form   | Glyburide / Metformin Oral Tablet [Glucovance 1.25 MG/250 MG]               | 861746             | 20090906                        | 20130331                      |
| METS2G_MET_GLYB           | 40165992          | Branded Drug Form   | Glyburide / Metformin Oral Tablet [Glucovance 2.5 MG/500 MG]                | 861751             | 20090906                        | 20130331                      |
| METS2G_MET_GLYB           | 40046144          | Branded Drug Form   | Glyburide / Metformin Oral Tablet [Glucovance]                              | 368169             | 19700101                        | 20090905                      |
| METS2G_MET_GLYB           | 40165993          | Branded Drug Form   | Glyburide / Metformin Oral Tablet [Glucovance]                              | 861756             | 20090906                        | 20991231                      |

| <b>Broader Drug Class</b> | <b>Concept ID</b> | <b>Class Type</b>   | <b>Trade or Brand Name</b>                                                                      | <b>RX CUI Code</b> | <b>Start Date of Valid Code</b> | <b>End Date of Valid Code</b> |
|---------------------------|-------------------|---------------------|-------------------------------------------------------------------------------------------------|--------------------|---------------------------------|-------------------------------|
| METS2G_MET_GLYB           | 36221460          | Clinical Dose Group | Glyburide / Metformin Oral Product                                                              | 1165845            | 20160801                        | 20991231                      |
| METS2G_MET_GLYB           | 36213837          | Clinical Dose Group | Glyburide / Metformin Pill                                                                      | 1156197            | 20160801                        | 20991231                      |
| METS2G_MET_GLYB           | 19077658          | Clinical Drug       | Glyburide 1.25 MG / Metformin 250 MG Oral Tablet                                                | 310533             | 19700101                        | 20090905                      |
| METS2G_MET_GLYB           | 40165994          | Clinical Drug       | Glyburide 1.25 MG / Metformin hydrochloride 250 MG Oral Tablet                                  | 861743             | 20090906                        | 20991231                      |
| METS2G_MET_GLYB           | 19063991          | Clinical Drug       | Glyburide 2.5 MG / Metformin 400 MG Oral Tablet                                                 | 250919             | 19700101                        | 20991231                      |
| METS2G_MET_GLYB           | 19077660          | Clinical Drug       | Glyburide 2.5 MG / Metformin 500 MG Oral Tablet                                                 | 310535             | 19700101                        | 20090905                      |
| METS2G_MET_GLYB           | 40165997          | Clinical Drug       | Glyburide 2.5 MG / Metformin hydrochloride 500 MG Oral Tablet                                   | 861748             | 20090906                        | 20991231                      |
| METS2G_MET_GLYB           | 19106860          | Clinical Drug       | Glyburide 5 MG / Metformin 1000 MG Oral Tablet                                                  | 429841             | 19700101                        | 20991231                      |
| METS2G_MET_GLYB           | 19077683          | Clinical Drug       | Glyburide 5 MG / Metformin 500 MG Oral Tablet                                                   | 310538             | 19700101                        | 20090905                      |
| METS2G_MET_GLYB           | 40166002          | Clinical Drug       | Glyburide 5 MG / Metformin hydrochloride 500 MG Oral Tablet                                     | 861753             | 20090906                        | 20991231                      |
| METS2G_MET_GLYB           | 40046143          | Clinical Drug Form  | Glyburide / Metformin Oral Tablet                                                               | 374635             | 19700101                        | 20991231                      |
| METSGL_MET_CANA           | 45774711          | Brand Name          | Invokamet                                                                                       | 1545151            | 20141201                        | 20991231                      |
| METSGL_MET_CANA           | 36246877          | Branded Dose Group  | Invokamet Oral Product                                                                          | 1545154            | 20160801                        | 20991231                      |
| METSGL_MET_CANA           | 36246878          | Branded Dose Group  | Invokamet Pill                                                                                  | 1545155            | 20160801                        | 20991231                      |
| METSGL_MET_CANA           | 1718903           | Branded Drug        | canagliflozin 150 MG / Metformin hydrochloride 1000 MG Extended Release Oral Tablet [Invokamet] | 1811001            | 20170103                        | 20991231                      |
| METSGL_MET_CANA           | 45774714          | Branded Drug        | canagliflozin 150 MG / Metformin hydrochloride 1000 MG Oral Tablet [Invokamet]                  | 1545156            | 20141201                        | 20991231                      |
| METSGL_MET_CANA           | 1718907           | Branded Drug        | canagliflozin 150 MG / Metformin hydrochloride 500 MG Extended Release Oral Tablet [Invokamet]  | 1811005            | 20170103                        | 20991231                      |
| METSGL_MET_CANA           | 45774717          | Branded Drug        | canagliflozin 150 MG / Metformin hydrochloride 500 MG Oral Tablet [Invokamet]                   | 1545159            | 20141201                        | 20991231                      |
| METSGL_MET_CANA           | 1718911           | Branded Drug        | canagliflozin 50 MG / Metformin hydrochloride 1000 MG Extended Release Oral Tablet [Invokamet]  | 1811009            | 20170103                        | 20991231                      |
| METSGL_MET_CANA           | 45774721          | Branded Drug        | canagliflozin 50 MG / Metformin hydrochloride 1000 MG Oral Tablet [Invokamet]                   | 1545163            | 20141201                        | 20991231                      |
| METSGL_MET_CANA           | 1718915           | Branded Drug        | canagliflozin 50 MG / Metformin hydrochloride 500 MG Extended Release Oral Tablet [Invokamet]   | 1811013            | 20170103                        | 20991231                      |
| METSGL_MET_CANA           | 45774724          | Branded Drug        | canagliflozin 50 MG / Metformin hydrochloride 500 MG Oral Tablet [Invokamet]                    | 1545166            | 20141201                        | 20991231                      |
| METSGL_MET_CANA           | 45774712          | Branded Drug Comp   | canagliflozin 150 MG / Metformin hydrochloride 1000 MG [Invokamet]                              | 1545152            | 20141201                        | 20991231                      |
| METSGL_MET_CANA           | 45774716          | Branded Drug Comp   | canagliflozin 150 MG / Metformin hydrochloride 500 MG [Invokamet]                               | 1545158            | 20141201                        | 20991231                      |
| METSGL_MET_CANA           | 45774720          | Branded Drug Comp   | canagliflozin 50 MG / Metformin hydrochloride 1000 MG [Invokamet]                               | 1545162            | 20141201                        | 20991231                      |
| METSGL_MET_CANA           | 45774723          | Branded Drug Comp   | canagliflozin 50 MG / Metformin hydrochloride 500 MG [Invokamet]                                | 1545165            | 20141201                        | 20991231                      |

| Broader Drug Class | Concept ID | Class Type          | Trade or Brand Name                                                                                   | RX CUI Code | Start Date of Valid Code | End Date of Valid Code |
|--------------------|------------|---------------------|-------------------------------------------------------------------------------------------------------|-------------|--------------------------|------------------------|
| METSGL_MET_CANA    | 1718900    | Branded Drug Form   | canagliflozin / Metformin Extended Release Oral Tablet [Invokamet]                                    | 1810998     | 20170103                 | 20991231               |
| METSGL_MET_CANA    | 45774713   | Branded Drug Form   | canagliflozin / Metformin Oral Tablet [Invokamet]                                                     | 1545153     | 20141201                 | 20991231               |
| METSGL_MET_CANA    | 36247438   | Clinical Dose Group | canagliflozin / Metformin Oral Product                                                                | 1545146     | 20160801                 | 20991231               |
| METSGL_MET_CANA    | 36247439   | Clinical Dose Group | canagliflozin / Metformin Pill                                                                        | 1545147     | 20160801                 | 20991231               |
| METSGL_MET_CANA    | 1718902    | Clinical Drug       | canagliflozin 150 MG / Metformin hydrochloride 1000 MG Extended Release Oral Tablet                   | 1811000     | 20170103                 | 20991231               |
| METSGL_MET_CANA    | 45774710   | Clinical Drug       | canagliflozin 150 MG / Metformin hydrochloride 1000 MG Oral Tablet                                    | 1545150     | 20141201                 | 20991231               |
| METSGL_MET_CANA    | 1718906    | Clinical Drug       | canagliflozin 150 MG / Metformin hydrochloride 500 MG Extended Release Oral Tablet                    | 1811004     | 20170103                 | 20991231               |
| METSGL_MET_CANA    | 45774715   | Clinical Drug       | canagliflozin 150 MG / Metformin hydrochloride 500 MG Oral Tablet                                     | 1545157     | 20141201                 | 20991231               |
| METSGL_MET_CANA    | 1718910    | Clinical Drug       | canagliflozin 50 MG / Metformin hydrochloride 1000 MG Extended Release Oral Tablet                    | 1811008     | 20170103                 | 20991231               |
| METSGL_MET_CANA    | 45774719   | Clinical Drug       | canagliflozin 50 MG / Metformin hydrochloride 1000 MG Oral Tablet                                     | 1545161     | 20141201                 | 20991231               |
| METSGL_MET_CANA    | 1718914    | Clinical Drug       | canagliflozin 50 MG / Metformin hydrochloride 500 MG Extended Release Oral Tablet                     | 1811012     | 20170103                 | 20991231               |
| METSGL_MET_CANA    | 45774722   | Clinical Drug       | canagliflozin 50 MG / Metformin hydrochloride 500 MG Oral Tablet                                      | 1545164     | 20141201                 | 20991231               |
| METSGL_MET_CANA    | 1718898    | Clinical Drug Form  | canagliflozin / Metformin Extended Release Oral Tablet                                                | 1810996     | 20170103                 | 20991231               |
| METSGL_MET_CANA    | 45774709   | Clinical Drug Form  | canagliflozin / Metformin Oral Tablet                                                                 | 1545148     | 20141201                 | 20991231               |
| METSGL_MET_CANA    | 1718901    | Quant Branded Drug  | 24 HR canagliflozin 150 MG / Metformin hydrochloride 1000 MG Extended Release Oral Tablet [Invokamet] | 1810999     | 20170103                 | 20991231               |
| METSGL_MET_CANA    | 1718905    | Quant Branded Drug  | 24 HR canagliflozin 150 MG / Metformin hydrochloride 500 MG Extended Release Oral Tablet [Invokamet]  | 1811003     | 20170103                 | 20991231               |
| METSGL_MET_CANA    | 1718909    | Quant Branded Drug  | 24 HR canagliflozin 50 MG / Metformin hydrochloride 1000 MG Extended Release Oral Tablet [Invokamet]  | 1811007     | 20170103                 | 20991231               |
| METSGL_MET_CANA    | 1718913    | Quant Branded Drug  | 24 HR canagliflozin 50 MG / Metformin hydrochloride 500 MG Extended Release Oral Tablet [Invokamet]   | 1811011     | 20170103                 | 20991231               |
| METSGL_MET_CANA    | 1718899    | Quant Clinical Drug | 24 HR canagliflozin 150 MG / Metformin hydrochloride 1000 MG Extended Release Oral Tablet             | 1810997     | 20170103                 | 20991231               |
| METSGL_MET_CANA    | 1718904    | Quant Clinical Drug | 24 HR canagliflozin 150 MG / Metformin hydrochloride 500 MG Extended Release Oral Tablet              | 1811002     | 20170103                 | 20991231               |
| METSGL_MET_CANA    | 1718908    | Quant Clinical Drug | 24 HR canagliflozin 50 MG / Metformin hydrochloride 1000 MG Extended Release Oral Tablet              | 1811006     | 20170103                 | 20991231               |
| METSGL_MET_CANA    | 1718912    | Quant Clinical Drug | 24 HR canagliflozin 50 MG / Metformin hydrochloride 500 MG Extended Release Oral Tablet               | 1811010     | 20170103                 | 20991231               |
| METSGL_MET_DAPA    | 45775387   | Brand Name          | Xigduo                                                                                                | 1592713     | 20141201                 | 20991231               |

| Broader Drug Class | Concept ID | Class Type          | Trade or Brand Name                                                                                | RX CUI Code | Start Date of Valid Code | End Date of Valid Code |
|--------------------|------------|---------------------|----------------------------------------------------------------------------------------------------|-------------|--------------------------|------------------------|
| METSGL_MET_DAPA    | 36248559   | Branded Dose Group  | Xigduo Oral Product                                                                                | 1592716     | 20160801                 | 20991231               |
| METSGL_MET_DAPA    | 36248560   | Branded Dose Group  | Xigduo Pill                                                                                        | 1592717     | 20160801                 | 20991231               |
| METSGL_MET_DAPA    | 45775861   | Branded Drug        | dapagliflozin 10 MG / Metformin hydrochloride 1000 MG Extended Release Oral Tablet [Xigduo]        | 1593776     | 20141201                 | 20991231               |
| METSGL_MET_DAPA    | 45775863   | Branded Drug        | dapagliflozin 10 MG / Metformin hydrochloride 500 MG Extended Release Oral Tablet [Xigduo]         | 1593827     | 20141201                 | 20991231               |
| METSGL_MET_DAPA    | 793830     | Branded Drug        | dapagliflozin 2.5 MG / Metformin hydrochloride 1000 MG Extended Release Oral Tablet [Xigduo]       | 1940500     | 20180205                 | 20991231               |
| METSGL_MET_DAPA    | 45775865   | Branded Drug        | dapagliflozin 5 MG / Metformin hydrochloride 1000 MG Extended Release Oral Tablet [Xigduo]         | 1593829     | 20141201                 | 20991231               |
| METSGL_MET_DAPA    | 45775868   | Branded Drug        | dapagliflozin 5 MG / Metformin hydrochloride 500 MG Extended Release Oral Tablet [Xigduo]          | 1593832     | 20141201                 | 20991231               |
| METSGL_MET_DAPA    | 45775388   | Branded Drug Comp   | dapagliflozin 10 MG / Metformin hydrochloride 1000 MG [Xigduo]                                     | 1592722     | 20141201                 | 20991231               |
| METSGL_MET_DAPA    | 45775862   | Branded Drug Comp   | dapagliflozin 10 MG / Metformin hydrochloride 500 MG [Xigduo]                                      | 1593826     | 20141201                 | 20991231               |
| METSGL_MET_DAPA    | 793827     | Branded Drug Comp   | dapagliflozin 2.5 MG / Metformin hydrochloride 1000 MG [Xigduo]                                    | 1940497     | 20180205                 | 20991231               |
| METSGL_MET_DAPA    | 45775864   | Branded Drug Comp   | dapagliflozin 5 MG / Metformin hydrochloride 1000 MG [Xigduo]                                      | 1593828     | 20141201                 | 20991231               |
| METSGL_MET_DAPA    | 45775866   | Branded Drug Comp   | dapagliflozin 5 MG / Metformin hydrochloride 500 MG [Xigduo]                                       | 1593830     | 20141201                 | 20991231               |
| METSGL_MET_DAPA    | 45775859   | Branded Drug Form   | dapagliflozin / Metformin Extended Release Oral Tablet [Xigduo]                                    | 1593774     | 20141201                 | 20991231               |
| METSGL_MET_DAPA    | 36248557   | Clinical Dose Group | dapagliflozin / Metformin Oral Product                                                             | 1592709     | 20160801                 | 20991231               |
| METSGL_MET_DAPA    | 36248558   | Clinical Dose Group | dapagliflozin / Metformin Pill                                                                     | 1592710     | 20160801                 | 20991231               |
| METSGL_MET_DAPA    | 45775456   | Clinical Drug       | dapagliflozin 10 MG / Metformin hydrochloride 1000 MG Extended Release Oral Tablet                 | 1593059     | 20141201                 | 20991231               |
| METSGL_MET_DAPA    | 45775620   | Clinical Drug       | dapagliflozin 10 MG / Metformin hydrochloride 500 MG Extended Release Oral Tablet                  | 1593069     | 20141201                 | 20991231               |
| METSGL_MET_DAPA    | 793829     | Clinical Drug       | dapagliflozin 2.5 MG / Metformin hydrochloride 1000 MG Extended Release Oral Tablet                | 1940499     | 20180205                 | 20991231               |
| METSGL_MET_DAPA    | 45775622   | Clinical Drug       | dapagliflozin 5 MG / Metformin hydrochloride 1000 MG Extended Release Oral Tablet                  | 1593071     | 20141201                 | 20991231               |
| METSGL_MET_DAPA    | 45775624   | Clinical Drug       | dapagliflozin 5 MG / Metformin hydrochloride 500 MG Extended Release Oral Tablet                   | 1593073     | 20141201                 | 20991231               |
| METSGL_MET_DAPA    | 45775454   | Clinical Drug Form  | dapagliflozin / Metformin Extended Release Oral Tablet                                             | 1593057     | 20141201                 | 20991231               |
| METSGL_MET_DAPA    | 45775860   | Quant Branded Drug  | 24 HR dapagliflozin 10 MG / Metformin hydrochloride 1000 MG Extended Release Oral Tablet [Xigduo]  | 1593775     | 20141201                 | 20991231               |
| METSGL_MET_DAPA    | 45776000   | Quant Branded Drug  | 24 HR dapagliflozin 10 MG / Metformin hydrochloride 500 MG Extended Release Oral Tablet [Xigduo]   | 1593835     | 20141201                 | 20991231               |
| METSGL_MET_DAPA    | 793828     | Quant Branded Drug  | 24 HR dapagliflozin 2.5 MG / Metformin hydrochloride 1000 MG Extended Release Oral Tablet [Xigduo] | 1940498     | 20180205                 | 20991231               |
| METSGL_MET_DAPA    | 45775999   | Quant Branded Drug  | 24 HR dapagliflozin 5 MG / Metformin hydrochloride 1000 MG Extended Release Oral Tablet [Xigduo]   | 1593833     | 20141201                 | 20991231               |

| Broader Drug Class | Concept ID | Class Type          | Trade or Brand Name                                                                             | RX CUI Code | Start Date of Valid Code | End Date of Valid Code |
|--------------------|------------|---------------------|-------------------------------------------------------------------------------------------------|-------------|--------------------------|------------------------|
| METSGL_MET_DAPA    | 45775867   | Quant Branded Drug  | 24 HR dapagliflozin 5 MG / Metformin hydrochloride 500 MG Extended Release Oral Tablet [Xigduo] | 1593831     | 20141201                 | 20991231               |
| METSGL_MET_DAPA    | 45775455   | Quant Clinical Drug | 24 HR dapagliflozin 10 MG / Metformin hydrochloride 1000 MG Extended Release Oral Tablet        | 1593058     | 20141201                 | 20991231               |
| METSGL_MET_DAPA    | 45775619   | Quant Clinical Drug | 24 HR dapagliflozin 10 MG / Metformin hydrochloride 500 MG Extended Release Oral Tablet         | 1593068     | 20141201                 | 20991231               |
| METSGL_MET_DAPA    | 793826     | Quant Clinical Drug | 24 HR dapagliflozin 2.5 MG / Metformin hydrochloride 1000 MG Extended Release Oral Tablet       | 1940496     | 20180205                 | 20991231               |
| METSGL_MET_DAPA    | 45775621   | Quant Clinical Drug | 24 HR dapagliflozin 5 MG / Metformin hydrochloride 1000 MG Extended Release Oral Tablet         | 1593070     | 20141201                 | 20991231               |
| METSGL_MET_DAPA    | 45775623   | Quant Clinical Drug | 24 HR dapagliflozin 5 MG / Metformin hydrochloride 500 MG Extended Release Oral Tablet          | 1593072     | 20141201                 | 20991231               |
| METSGL_MET_EMPA    | 46287681   | Brand Name          | Synjardy                                                                                        | 1664316     | 20151005                 | 20991231               |
| METSGL_MET_EMPA    | 36248376   | Branded Dose Group  | Synjardy Oral Product                                                                           | 1664319     | 20160801                 | 20991231               |
| METSGL_MET_EMPA    | 36248377   | Branded Dose Group  | Synjardy Pill                                                                                   | 1664320     | 20160801                 | 20991231               |
| METSGL_MET_EMPA    | 1592793    | Branded Drug        | empagliflozin 10 MG / Metformin hydrochloride 1000 MG Extended Release Oral Tablet [Synjardy]   | 1862690     | 20170807                 | 20991231               |
| METSGL_MET_EMPA    | 1592797    | Branded Drug        | empagliflozin 12.5 MG / Metformin hydrochloride 1000 MG Extended Release Oral Tablet [Synjardy] | 1862694     | 20170807                 | 20991231               |
| METSGL_MET_EMPA    | 46287410   | Branded Drug        | empagliflozin 12.5 MG / Metformin hydrochloride 1000 MG Oral Tablet [Synjardy]                  | 1665369     | 20151005                 | 20991231               |
| METSGL_MET_EMPA    | 46287688   | Branded Drug        | empagliflozin 12.5 MG / Metformin hydrochloride 500 MG Oral Tablet [Synjardy]                   | 1664325     | 20151005                 | 20991231               |
| METSGL_MET_EMPA    | 1592802    | Branded Drug        | empagliflozin 25 MG / Metformin hydrochloride 1000 MG Extended Release Oral Tablet [Synjardy]   | 1862699     | 20170807                 | 20991231               |
| METSGL_MET_EMPA    | 1592806    | Branded Drug        | empagliflozin 5 MG / Metformin hydrochloride 1000 MG Extended Release Oral Tablet [Synjardy]    | 1862703     | 20170807                 | 20991231               |
| METSGL_MET_EMPA    | 46287691   | Branded Drug        | empagliflozin 5 MG / Metformin hydrochloride 1000 MG Oral Tablet [Synjardy]                     | 1664328     | 20151005                 | 20991231               |
| METSGL_MET_EMPA    | 46287684   | Branded Drug        | empagliflozin 5 MG / Metformin hydrochloride 500 MG Oral Tablet [Synjardy]                      | 1664321     | 20151005                 | 20991231               |
| METSGL_MET_EMPA    | 1592654    | Branded Drug Comp   | empagliflozin 10 MG / Metformin hydrochloride 1000 MG [Synjardy]                                | 1862686     | 20170807                 | 20991231               |
| METSGL_MET_EMPA    | 46287409   | Branded Drug Comp   | empagliflozin 12.5 MG / Metformin hydrochloride 1000 MG [Synjardy]                              | 1665368     | 20151005                 | 20991231               |
| METSGL_MET_EMPA    | 46287687   | Branded Drug Comp   | empagliflozin 12.5 MG / Metformin hydrochloride 500 MG [Synjardy]                               | 1664324     | 20151005                 | 20991231               |
| METSGL_MET_EMPA    | 1592799    | Branded Drug Comp   | empagliflozin 25 MG / Metformin hydrochloride 1000 MG [Synjardy]                                | 1862696     | 20170807                 | 20991231               |



| Broader Drug Class | Concept ID | Class Type          | Trade or Brand Name                                                                                   | RX CUI Code | Start Date of Valid Code | End Date of Valid Code |
|--------------------|------------|---------------------|-------------------------------------------------------------------------------------------------------|-------------|--------------------------|------------------------|
| METSGL_MET_EMPA    | 46287690   | Branded Drug Comp   | empagliflozin 5 MG / Metformin hydrochloride 1000 MG [Synjardy]                                       | 1664327     | 20151005                 | 20991231               |
| METSGL_MET_EMPA    | 46287682   | Branded Drug Comp   | empagliflozin 5 MG / Metformin hydrochloride 500 MG [Synjardy]                                        | 1664317     | 20151005                 | 20991231               |
| METSGL_MET_EMPA    | 1592655    | Branded Drug Form   | empagliflozin / Metformin Extended Release Oral Tablet [Synjardy]                                     | 1862687     | 20170807                 | 20991231               |
| METSGL_MET_EMPA    | 46287683   | Branded Drug Form   | empagliflozin / Metformin Oral Tablet [Synjardy]                                                      | 1664318     | 20151005                 | 20991231               |
| METSGL_MET_EMPA    | 36248374   | Clinical Dose Group | empagliflozin / Metformin Oral Product                                                                | 1664311     | 20160801                 | 20991231               |
| METSGL_MET_EMPA    | 36248375   | Clinical Dose Group | empagliflozin / Metformin Pill                                                                        | 1664312     | 20160801                 | 20991231               |
| METSGL_MET_EMPA    | 1592657    | Clinical Drug       | empagliflozin 10 MG / Metformin hydrochloride 1000 MG Extended Release Oral Tablet                    | 1862689     | 20170807                 | 20991231               |
| METSGL_MET_EMPA    | 1592796    | Clinical Drug       | empagliflozin 12.5 MG / Metformin hydrochloride 1000 MG Extended Release Oral Tablet                  | 1862693     | 20170807                 | 20991231               |
| METSGL_MET_EMPA    | 46287408   | Clinical Drug       | empagliflozin 12.5 MG / Metformin hydrochloride 1000 MG Oral Tablet                                   | 1665367     | 20151005                 | 20991231               |
| METSGL_MET_EMPA    | 46287686   | Clinical Drug       | empagliflozin 12.5 MG / Metformin hydrochloride 500 MG Oral Tablet                                    | 1664323     | 20151005                 | 20991231               |
| METSGL_MET_EMPA    | 1592801    | Clinical Drug       | empagliflozin 25 MG / Metformin hydrochloride 1000 MG Extended Release Oral Tablet                    | 1862698     | 20170807                 | 20991231               |
| METSGL_MET_EMPA    | 1592805    | Clinical Drug       | empagliflozin 5 MG / Metformin hydrochloride 1000 MG Extended Release Oral Tablet                     | 1862702     | 20170807                 | 20991231               |
| METSGL_MET_EMPA    | 46287689   | Clinical Drug       | empagliflozin 5 MG / Metformin hydrochloride 1000 MG Oral Tablet                                      | 1664326     | 20151005                 | 20991231               |
| METSGL_MET_EMPA    | 46287680   | Clinical Drug       | empagliflozin 5 MG / Metformin hydrochloride 500 MG Oral Tablet                                       | 1664315     | 20151005                 | 20991231               |
| METSGL_MET_EMPA    | 1592652    | Clinical Drug Form  | empagliflozin / Metformin Extended Release Oral Tablet                                                | 1862684     | 20170807                 | 20991231               |
| METSGL_MET_EMPA    | 46287679   | Clinical Drug Form  | empagliflozin / Metformin Oral Tablet                                                                 | 1664313     | 20151005                 | 20991231               |
| METSGL_MET_EMPA    | 1592656    | Quant Branded Drug  | 24 HR empagliflozin 10 MG / Metformin hydrochloride 1000 MG Extended Release Oral Tablet [Synjardy]   | 1862688     | 20170807                 | 20991231               |
| METSGL_MET_EMPA    | 1592795    | Quant Branded Drug  | 24 HR empagliflozin 12.5 MG / Metformin hydrochloride 1000 MG Extended Release Oral Tablet [Synjardy] | 1862692     | 20170807                 | 20991231               |
| METSGL_MET_EMPA    | 1592800    | Quant Branded Drug  | 24 HR empagliflozin 25 MG / Metformin hydrochloride 1000 MG Extended Release Oral Tablet [Synjardy]   | 1862697     | 20170807                 | 20991231               |
| METSGL_MET_EMPA    | 1592804    | Quant Branded Drug  | 24 HR empagliflozin 5 MG / Metformin hydrochloride 1000 MG Extended Release Oral Tablet [Synjardy]    | 1862701     | 20170807                 | 20991231               |
| METSGL_MET_EMPA    | 1592653    | Quant Clinical Drug | 24 HR empagliflozin 10 MG / Metformin hydrochloride 1000 MG Extended Release Oral Tablet              | 1862685     | 20170807                 | 20991231               |
| METSGL_MET_EMPA    | 1592794    | Quant Clinical Drug | 24 HR empagliflozin 12.5 MG / Metformin hydrochloride 1000 MG Extended Release Oral Tablet            | 1862691     | 20170807                 | 20991231               |
| METSGL_MET_EMPA    | 1592798    | Quant Clinical Drug | 24 HR empagliflozin 25 MG / Metformin hydrochloride 1000 MG Extended Release Oral Tablet              | 1862695     | 20170807                 | 20991231               |

| Broader Drug Class | Concept ID | Class Type          | Trade or Brand Name                                                                              | RX CUI Code | Start Date of Valid Code | End Date of Valid Code |
|--------------------|------------|---------------------|--------------------------------------------------------------------------------------------------|-------------|--------------------------|------------------------|
|                    |            |                     | 24 HR empagliflozin 5 MG / Metformin hydrochloride 1000 MG                                       |             |                          |                        |
| METSGL_MET_EMPA    | 1592803    | Quant Clinical Drug | Extended Release Oral Tablet                                                                     | 1862700     | 20170807                 | 20991231               |
| METTZD_MET_PIOG    | 19122316   | Brand Name          | Actoplus Met                                                                                     | 602411      | 20060226                 | 20991231               |
| METTZD_MET_PIOG    | 40171535   | Brand Name          | Actoplus Met 15/1000                                                                             | 899990      | 20100228                 | 20130331               |
| METTZD_MET_PIOG    | 19017109   | Brand Name          | Actoplus Met 15/500                                                                              | 731440      | 20071230                 | 20130331               |
| METTZD_MET_PIOG    | 19017107   | Brand Name          | Actoplus Met 15/850                                                                              | 731423      | 20071230                 | 20130331               |
| METTZD_MET_PIOG    | 40171536   | Brand Name          | Actoplus Met 30/1000                                                                             | 899997      | 20100228                 | 20130331               |
| METTZD_MET_PIOG    | 36236322   | Branded Dose Group  | Actoplus Met Oral Product                                                                        | 1169920     | 20160801                 | 20991231               |
| METTZD_MET_PIOG    | 36236323   | Branded Dose Group  | Actoplus Met Pill                                                                                | 1169923     | 20160801                 | 20991231               |
| METTZD_MET_PIOG    | 1525248    | Branded Drug        | Metformin 500 MG / pioglitazone 15 MG Oral Tablet [Actoplus Met 15/500]                          | 731443      | 20071230                 | 20090905               |
| METTZD_MET_PIOG    | 40130007   | Branded Drug        | Metformin 500 MG / pioglitazone 15 MG Oral Tablet [Actoplus Met]                                 | 602414      | 20060226                 | 20080330               |
| METTZD_MET_PIOG    | 1525247    | Branded Drug        | Metformin 850 MG / pioglitazone 15 MG Oral Tablet [Actoplus Met 15/850]                          | 731426      | 20071230                 | 20090905               |
| METTZD_MET_PIOG    | 40129890   | Branded Drug        | Metformin 850 MG / pioglitazone 15 MG Oral Tablet [Actoplus Met]                                 | 602416      | 20060226                 | 20080330               |
| METTZD_MET_PIOG    | 40173235   | Branded Drug        | Metformin hydrochloride 1000 MG / pioglitazone 15 MG Extended Release Oral Tablet [Actoplus Met] | 899995      | 20100228                 | 20991231               |
| METTZD_MET_PIOG    | 40173238   | Branded Drug        | Metformin hydrochloride 1000 MG / pioglitazone 30 MG Extended Release Oral Tablet [Actoplus Met] | 900002      | 20100228                 | 20991231               |
| METTZD_MET_PIOG    | 40164905   | Branded Drug        | Metformin hydrochloride 500 MG / pioglitazone 15 MG Oral Tablet [Actoplus Met]                   | 861785      | 20090906                 | 20991231               |
| METTZD_MET_PIOG    | 40164944   | Branded Drug        | Metformin hydrochloride 850 MG / pioglitazone 15 MG Oral Tablet [Actoplus Met]                   | 861824      | 20090906                 | 20991231               |
| METTZD_MET_PIOG    | 19017110   | Branded Drug Comp   | Metformin 500 MG / pioglitazone 15 MG [Actoplus Met 15/500]                                      | 731441      | 20071230                 | 20090905               |
| METTZD_MET_PIOG    | 40130008   | Branded Drug Comp   | Metformin 500 MG / pioglitazone 15 MG [Actoplus Met]                                             | 602412      | 20060226                 | 20080427               |
| METTZD_MET_PIOG    | 19017108   | Branded Drug Comp   | Metformin 850 MG / pioglitazone 15 MG [Actoplus Met 15/850]                                      | 731424      | 20071230                 | 20090905               |
| METTZD_MET_PIOG    | 40129891   | Branded Drug Comp   | Metformin 850 MG / pioglitazone 15 MG [Actoplus Met]                                             | 602415      | 20060226                 | 20080427               |
| METTZD_MET_PIOG    | 40173236   | Branded Drug Comp   | Metformin hydrochloride 1000 MG / pioglitazone 15 MG [Actoplus Met]                              | 899991      | 20100228                 | 20991231               |
| METTZD_MET_PIOG    | 40173239   | Branded Drug Comp   | Metformin hydrochloride 1000 MG / pioglitazone 30 MG [Actoplus Met]                              | 899998      | 20100228                 | 20991231               |
| METTZD_MET_PIOG    | 40164906   | Branded Drug Comp   | Metformin hydrochloride 500 MG / pioglitazone 15 MG [Actoplus Met]                               | 861784      | 20090906                 | 20991231               |
| METTZD_MET_PIOG    | 40164945   | Branded Drug Comp   | Metformin hydrochloride 850 MG / pioglitazone 15 MG [Actoplus Met]                               | 861823      | 20090906                 | 20991231               |
| METTZD_MET_PIOG    | 40173227   | Branded Drug Form   | Metformin / pioglitazone Extended Release Oral Tablet [Actoplus Met]                             | 899992      | 20100228                 | 20991231               |

| Broader Drug Class | Concept ID | Class Type          | Trade or Brand Name                                                                                    | RX CUI Code | Start Date of Valid Code | End Date of Valid Code |
|--------------------|------------|---------------------|--------------------------------------------------------------------------------------------------------|-------------|--------------------------|------------------------|
| METTZD_MET_PIOG    | 40173228   | Branded Drug Form   | Metformin / pioglitazone Extended Release Tablet [Actoplus Met 30/1000]                                | 899999      | 20100228                 | 20130331               |
| METTZD_MET_PIOG    | 40143323   | Branded Drug Form   | Metformin / pioglitazone Oral Tablet [Actoplus Met 15/850]                                             | 731425      | 20071230                 | 20130331               |
| METTZD_MET_PIOG    | 40130006   | Branded Drug Form   | Metformin / pioglitazone Oral Tablet [Actoplus Met]                                                    | 602413      | 20060226                 | 20080727               |
| METTZD_MET_PIOG    | 40143322   | Branded Drug Form   | Metformin / pioglitazone Oral Tablet [Actoplus Met]                                                    | 731442      | 20071230                 | 20991231               |
| METTZD_MET_PIOG    | 36223131   | Clinical Dose Group | Metformin / pioglitazone Oral Product                                                                  | 1161597     | 20160801                 | 20991231               |
| METTZD_MET_PIOG    | 36223132   | Clinical Dose Group | Metformin / pioglitazone Pill                                                                          | 1161598     | 20160801                 | 20991231               |
| METTZD_MET_PIOG    | 19121219   | Clinical Drug       | Metformin 500 MG / pioglitazone 15 MG Oral Tablet                                                      | 577094      | 20051113                 | 20090905               |
| METTZD_MET_PIOG    | 19121220   | Clinical Drug       | Metformin 850 MG / pioglitazone 15 MG Oral Tablet                                                      | 577095      | 20051113                 | 20090905               |
| METTZD_MET_PIOG    | 40173234   | Clinical Drug       | Metformin hydrochloride 1000 MG / pioglitazone 15 MG Extended Release Oral Tablet                      | 899994      | 20100228                 | 20991231               |
| METTZD_MET_PIOG    | 40173237   | Clinical Drug       | Metformin hydrochloride 1000 MG / pioglitazone 30 MG Extended Release Oral Tablet                      | 900001      | 20100228                 | 20991231               |
| METTZD_MET_PIOG    | 40164904   | Clinical Drug       | Metformin hydrochloride 500 MG / pioglitazone 15 MG Oral Tablet                                        | 861783      | 20090906                 | 20991231               |
| METTZD_MET_PIOG    | 40164943   | Clinical Drug       | Metformin hydrochloride 850 MG / pioglitazone 15 MG Oral Tablet                                        | 861822      | 20090906                 | 20991231               |
| METTZD_MET_PIOG    | 40173226   | Clinical Drug Form  | Metformin / pioglitazone Extended Release Oral Tablet                                                  | 899988      | 20100228                 | 20991231               |
| METTZD_MET_PIOG    | 40126689   | Clinical Drug Form  | Metformin / pioglitazone Oral Tablet                                                                   | 577093      | 20051113                 | 20991231               |
| METTZD_MET_PIOG    | 40171449   | Quant Branded Drug  | 24 HR Metformin hydrochloride 1000 MG / pioglitazone 15 MG Extended Release Oral Tablet [Actoplus Met] | 899993      | 20100228                 | 20991231               |
| METTZD_MET_PIOG    | 40171451   | Quant Branded Drug  | 24 HR Metformin hydrochloride 1000 MG / pioglitazone 30 MG Extended Release Oral Tablet [Actoplus Met] | 900000      | 20100228                 | 20991231               |
| METTZD_MET_PIOG    | 40171448   | Quant Clinical Drug | 24 HR Metformin hydrochloride 1000 MG / pioglitazone 15 MG Extended Release Oral Tablet                | 899989      | 20100228                 | 20991231               |
| METTZD_MET_PIOG    | 40171450   | Quant Clinical Drug | 24 HR Metformin hydrochloride 1000 MG / pioglitazone 30 MG Extended Release Oral Tablet                | 899996      | 20100228                 | 20991231               |
| METTZD_MET_ROSI    | 19098518   | Brand Name          | Avandamet                                                                                              | 352450      | 19700101                 | 20991231               |
| METTZD_MET_ROSI    | 19032715   | Brand Name          | Avandamet 1/500                                                                                        | 806273      | 20080928                 | 20130331               |
| METTZD_MET_ROSI    | 19032741   | Brand Name          | Avandamet 2/1000                                                                                       | 806285      | 20080928                 | 20130331               |
| METTZD_MET_ROSI    | 19032745   | Brand Name          | Avandamet 2/500                                                                                        | 806293      | 20080928                 | 20130331               |
| METTZD_MET_ROSI    | 19032719   | Brand Name          | Avandamet 4/1000                                                                                       | 806281      | 20080928                 | 20130331               |
| METTZD_MET_ROSI    | 19032743   | Brand Name          | Avandamet 4/500                                                                                        | 806289      | 20080928                 | 20130331               |
| METTZD_MET_ROSI    | 36235581   | Branded Dose Group  | Avandamet Oral Product                                                                                 | 1175016     | 20160801                 | 20991231               |
| METTZD_MET_ROSI    | 36235582   | Branded Dose Group  | Avandamet Pill                                                                                         | 1175021     | 20160801                 | 20991231               |
| METTZD_MET_ROSI    | 19132005   | Branded Drug        | Metformin 1000 MG / rosiglitazone 2 MG Oral Tablet [Avandamet 2/1000]                                  | 806288      | 20080928                 | 20090905               |
| METTZD_MET_ROSI    | 40063313   | Branded Drug        | Metformin 1000 MG / rosiglitazone 2 MG Oral Tablet [avandamet]                                         | 404646      | 19700101                 | 20080927               |
| METTZD_MET_ROSI    | 19132003   | Branded Drug        | Metformin 1000 MG / rosiglitazone 4 MG Oral Tablet [Avandamet 4/1000]                                  | 806284      | 20080928                 | 20090905               |
| METTZD_MET_ROSI    | 40063315   | Branded Drug        | Metformin 1000 MG / rosiglitazone 4 MG Oral Tablet [avandamet]                                         | 404647      | 19700101                 | 20080927               |

| <b>Broader Drug Class</b> | <b>Concept ID</b> | <b>Class Type</b> | <b>Trade or Brand Name</b>                                                   | <b>RX CUI Code</b> | <b>Start Date of Valid Code</b> | <b>End Date of Valid Code</b> |
|---------------------------|-------------------|-------------------|------------------------------------------------------------------------------|--------------------|---------------------------------|-------------------------------|
| METTZD_MET_ROSI           | 40117770          | Branded Drug      | Metformin 500 MG / rosinirole 2 MG Oral Tablet [avandamet]                   | 541778             | 20050911                        | 20080127                      |
| METTZD_MET_ROSI           | 19131999          | Branded Drug      | Metformin 500 MG / rosiglitazone 1 MG Oral Tablet [Avandamet 1/500]          | 806276             | 20080928                        | 20090905                      |
| METTZD_MET_ROSI           | 40063326          | Branded Drug      | Metformin 500 MG / rosiglitazone 1 MG Oral Tablet [avandamet]                | 352294             | 19700101                        | 20080927                      |
| METTZD_MET_ROSI           | 40147006          | Branded Drug      | Metformin 500 MG / rosiglitazone 2 MG Oral Tablet [Adandamet 2/500]          | 759754             | 20080302                        | 20080927                      |
| METTZD_MET_ROSI           | 19132009          | Branded Drug      | Metformin 500 MG / rosiglitazone 2 MG Oral Tablet [Avandamet 2/500]          | 806296             | 20080928                        | 20090905                      |
| METTZD_MET_ROSI           | 40063328          | Branded Drug      | Metformin 500 MG / rosiglitazone 2 MG Oral Tablet [avandamet]                | 352295             | 19700101                        | 20081109                      |
| METTZD_MET_ROSI           | 19132007          | Branded Drug      | Metformin 500 MG / rosiglitazone 4 MG Oral Tablet [Avandamet 4/500]          | 806292             | 20080928                        | 20090905                      |
| METTZD_MET_ROSI           | 40063330          | Branded Drug      | Metformin 500 MG / rosiglitazone 4 MG Oral Tablet [avandamet]                | 352296             | 19700101                        | 20080927                      |
| METTZD_MET_ROSI           | 40164886          | Branded Drug      | Metformin hydrochloride 1000 MG / rosiglitazone 2 MG Oral Tablet [Avandamet] | 861762             | 20090906                        | 20991231                      |
| METTZD_MET_ROSI           | 40164889          | Branded Drug      | Metformin hydrochloride 1000 MG / rosiglitazone 4 MG Oral Tablet [Avandamet] | 861765             | 20090906                        | 20991231                      |
| METTZD_MET_ROSI           | 40164914          | Branded Drug      | Metformin hydrochloride 500 MG / rosiglitazone 1 MG Oral Tablet [Avandamet]  | 861797             | 20090906                        | 20991231                      |
| METTZD_MET_ROSI           | 40164917          | Branded Drug      | Metformin hydrochloride 500 MG / rosiglitazone 2 MG Oral Tablet [Avandamet]  | 861808             | 20090906                        | 20991231                      |
| METTZD_MET_ROSI           | 40164920          | Branded Drug      | Metformin hydrochloride 500 MG / rosiglitazone 4 MG Oral Tablet [Avandamet]  | 861818             | 20090906                        | 20991231                      |
| METTZD_MET_ROSI           | 19132004          | Branded Drug Comp | Metformin 1000 MG / rosiglitazone 2 MG [Avandamet 2/1000]                    | 806286             | 20080928                        | 20090905                      |
| METTZD_MET_ROSI           | 40117728          | Branded Drug Comp | Metformin 1000 MG / rosiglitazone 2 MG [avandamet]                           | 576549             | 20050911                        | 20080927                      |
| METTZD_MET_ROSI           | 19132002          | Branded Drug Comp | Metformin 1000 MG / rosiglitazone 4 MG [Avandamet 4/1000]                    | 806282             | 20080928                        | 20090905                      |
| METTZD_MET_ROSI           | 40117729          | Branded Drug Comp | Metformin 1000 MG / rosiglitazone 4 MG [avandamet]                           | 576550             | 20050911                        | 20080927                      |
| METTZD_MET_ROSI           | 40117771          | Branded Drug Comp | Metformin 500 MG / rosinirole 2 MG [avandamet]                               | 541776             | 20050911                        | 20080127                      |
| METTZD_MET_ROSI           | 19131998          | Branded Drug Comp | Metformin 500 MG / rosiglitazone 1 MG [Avandamet 1/500]                      | 806274             | 20080928                        | 20090905                      |
| METTZD_MET_ROSI           | 40117772          | Branded Drug Comp | Metformin 500 MG / rosiglitazone 1 MG [avandamet]                            | 575991             | 20050911                        | 20080927                      |
| METTZD_MET_ROSI           | 40147007          | Branded Drug Comp | Metformin 500 MG / rosiglitazone 2 MG [Adandamet 2/500]                      | 759752             | 20080302                        | 20080927                      |
| METTZD_MET_ROSI           | 19132008          | Branded Drug Comp | Metformin 500 MG / rosiglitazone 2 MG [Avandamet 2/500]                      | 806294             | 20080928                        | 20090905                      |
| METTZD_MET_ROSI           | 40117773          | Branded Drug Comp | Metformin 500 MG / rosiglitazone 2 MG [avandamet]                            | 575992             | 20050911                        | 20081109                      |
| METTZD_MET_ROSI           | 19132006          | Branded Drug Comp | Metformin 500 MG / rosiglitazone 4 MG [Avandamet 4/500]                      | 806290             | 20080928                        | 20090905                      |
| METTZD_MET_ROSI           | 40117774          | Branded Drug Comp | Metformin 500 MG / rosiglitazone 4 MG [avandamet]                            | 575993             | 20050911                        | 20080927                      |
| METTZD_MET_ROSI           | 40164887          | Branded Drug Comp | Metformin hydrochloride 1000 MG / rosiglitazone 2 MG [Avandamet]             | 861761             | 20090906                        | 20991231                      |
| METTZD_MET_ROSI           | 40164890          | Branded Drug Comp | Metformin hydrochloride 1000 MG / rosiglitazone 4 MG [Avandamet]             | 861764             | 20090906                        | 20991231                      |

| Broader Drug Class | Concept ID | Class Type          | Trade or Brand Name                                              | RX CUI Code | Start Date of Valid Code | End Date of Valid Code |
|--------------------|------------|---------------------|------------------------------------------------------------------|-------------|--------------------------|------------------------|
| METTZD_MET_ROSI    | 40164915   | Branded Drug Comp   | Metformin hydrochloride 500 MG / rosiglitazone 1 MG [Avandamet]  | 861796      | 20090906                 | 20991231               |
| METTZD_MET_ROSI    | 40164918   | Branded Drug Comp   | Metformin hydrochloride 500 MG / rosiglitazone 2 MG [Avandamet]  | 861807      | 20090906                 | 20991231               |
| METTZD_MET_ROSI    | 40164921   | Branded Drug Comp   | Metformin hydrochloride 500 MG / rosiglitazone 4 MG [Avandamet]  | 861817      | 20090906                 | 20991231               |
| METTZD_MET_ROSI    | 40117726   | Branded Drug Form   | Metformin / ropinirole Oral Tablet [avandamet]                   | 541777      | 20050911                 | 20051204               |
| METTZD_MET_ROSI    | 40146998   | Branded Drug Form   | Metformin / rosiglitazone Oral Tablet [Adandamet 2/500]          | 759753      | 20080302                 | 20080927               |
| METTZD_MET_ROSI    | 40153894   | Branded Drug Form   | Metformin / rosiglitazone Oral Tablet [Avandamet 1/500]          | 806275      | 20080928                 | 20130331               |
| METTZD_MET_ROSI    | 40153896   | Branded Drug Form   | Metformin / rosiglitazone Oral Tablet [Avandamet 2/500]          | 806295      | 20080928                 | 20130331               |
| METTZD_MET_ROSI    | 40153897   | Branded Drug Form   | Metformin / rosiglitazone Oral Tablet [Avandamet 4/1000]         | 806283      | 20080928                 | 20130331               |
| METTZD_MET_ROSI    | 40153898   | Branded Drug Form   | Metformin / rosiglitazone Oral Tablet [Avandamet 4/500]          | 806291      | 20080928                 | 20130331               |
| METTZD_MET_ROSI    | 40063307   | Branded Drug Form   | Metformin / rosiglitazone Oral Tablet [avandamet]                | 368568      | 19700101                 | 20080127               |
| METTZD_MET_ROSI    | 40140309   | Branded Drug Form   | Metformin / rosiglitazone Oral Tablet [Avandamet]                | 706114      | 20070701                 | 20081109               |
| METTZD_MET_ROSI    | 40153895   | Branded Drug Form   | Metformin / rosiglitazone Oral Tablet [Avandamet]                | 806287      | 20080928                 | 20991231               |
| METTZD_MET_ROSI    | 36223137   | Clinical Dose Group | Metformin / rosiglitazone Oral Product                           | 1161603     | 20160801                 | 20991231               |
| METTZD_MET_ROSI    | 36223138   | Clinical Dose Group | Metformin / rosiglitazone Pill                                   | 1161604     | 20160801                 | 20991231               |
| METTZD_MET_ROSI    | 19102514   | Clinical Drug       | Metformin 1000 MG / rosiglitazone 2 MG Oral Tablet               | 403915      | 19700101                 | 20090905               |
| METTZD_MET_ROSI    | 19102515   | Clinical Drug       | Metformin 1000 MG / rosiglitazone 4 MG Oral Tablet               | 403916      | 19700101                 | 20090905               |
| METTZD_MET_ROSI    | 1547552    | Clinical Drug       | Metformin 500 MG / rosiglitazone 1 MG Oral Tablet                | 351268      | 19700101                 | 20090905               |
| METTZD_MET_ROSI    | 1547553    | Clinical Drug       | Metformin 500 MG / rosiglitazone 2 MG Oral Tablet                | 351269      | 19700101                 | 20090905               |
| METTZD_MET_ROSI    | 1547511    | Clinical Drug       | Metformin 500 MG / rosiglitazone 4 MG Oral Tablet                | 349554      | 19700101                 | 20090905               |
| METTZD_MET_ROSI    | 40164885   | Clinical Drug       | Metformin hydrochloride 1000 MG / rosiglitazone 2 MG Oral Tablet | 861760      | 20090906                 | 20991231               |
| METTZD_MET_ROSI    | 40164888   | Clinical Drug       | Metformin hydrochloride 1000 MG / rosiglitazone 4 MG Oral Tablet | 861763      | 20090906                 | 20991231               |
| METTZD_MET_ROSI    | 40164913   | Clinical Drug       | Metformin hydrochloride 500 MG / rosiglitazone 1 MG Oral Tablet  | 861795      | 20090906                 | 20991231               |
| METTZD_MET_ROSI    | 40164916   | Clinical Drug       | Metformin hydrochloride 500 MG / rosiglitazone 2 MG Oral Tablet  | 861806      | 20090906                 | 20991231               |
| METTZD_MET_ROSI    | 40164919   | Clinical Drug       | Metformin hydrochloride 500 MG / rosiglitazone 4 MG Oral Tablet  | 861816      | 20090906                 | 20991231               |
| METTZD_MET_ROSI    | 40063306   | Clinical Drug Form  | Metformin / rosiglitazone Oral Tablet                            | 378729      | 19700101                 | 20991231               |
| SGLDPP_DAPA_SAXA   | 1592323    | Branded Drug        | dapagliflozin 10 MG / saxagliptin 5 MG Oral Tablet [Qtern]       | 1925504     | 20170807                 | 20991231               |
| SGLDPP_DAPA_SAXA   | 1592319    | Branded Drug Comp   | dapagliflozin 10 MG / saxagliptin 5 MG [Qtern]                   | 1925500     | 20170807                 | 20991231               |
| SGLDPP_DAPA_SAXA   | 1592320    | Branded Drug Form   | dapagliflozin / saxagliptin Oral Tablet [Qtern]                  | 1925501     | 20170807                 | 20991231               |
| SGLDPP_DAPA_SAXA   | 1592314    | Clinical Dose Group | dapagliflozin / saxagliptin Oral Product                         | 1925495     | 20170807                 | 20991231               |
| SGLDPP_DAPA_SAXA   | 1592315    | Clinical Dose Group | dapagliflozin / saxagliptin Pill                                 | 1925496     | 20170807                 | 20991231               |
| SGLDPP_DAPA_SAXA   | 1592317    | Clinical Drug       | dapagliflozin 10 MG / saxagliptin 5 MG Oral Tablet               | 1925498     | 20170807                 | 20991231               |
| SGLDPP_DAPA_SAXA   | 1592316    | Clinical Drug Form  | dapagliflozin / saxagliptin Oral Tablet                          | 1925497     | 20170807                 | 20991231               |
| SGLDPP_EMPA_LINA   | 45892173   | Brand Name          | Glyxambi                                                         | 1602110     | 20150302                 | 20991231               |
| SGLDPP_EMPA_LINA   | 36248789   | Branded Dose Group  | Glyxambi Oral Product                                            | 1602113     | 20160801                 | 20991231               |

| <b>Broader Drug Class</b> | <b>Concept ID</b> | <b>Class Type</b>   | <b>Trade or Brand Name</b>                                       | <b>RX CUI Code</b> | <b>Start Date of Valid Code</b> | <b>End Date of Valid Code</b> |
|---------------------------|-------------------|---------------------|------------------------------------------------------------------|--------------------|---------------------------------|-------------------------------|
| SGLDPP_EMPA_LINA          | 36248790          | Branded Dose Group  | Glyxambi Pill                                                    | 1602114            | 20160801                        | 20991231                      |
| SGLDPP_EMPA_LINA          | 45892176          | Branded Drug        | empagliflozin 10 MG / Linagliptin 5 MG Oral Tablet [Glyxambi]    | 1602115            | 20150302                        | 20991231                      |
| SGLDPP_EMPA_LINA          | 45892179          | Branded Drug        | empagliflozin 25 MG / Linagliptin 5 MG Oral Tablet [Glyxambi]    | 1602120            | 20150302                        | 20991231                      |
| SGLDPP_EMPA_LINA          | 45892174          | Branded Drug Comp   | empagliflozin 10 MG / Linagliptin 5 MG [Glyxambi]                | 1602111            | 20150302                        | 20991231                      |
| SGLDPP_EMPA_LINA          | 45892178          | Branded Drug Comp   | empagliflozin 25 MG / Linagliptin 5 MG [Glyxambi]                | 1602119            | 20150302                        | 20991231                      |
| SGLDPP_EMPA_LINA          | 45892175          | Branded Drug Form   | empagliflozin / Linagliptin Oral Tablet [Glyxambi]               | 1602112            | 20150302                        | 20991231                      |
| SGLDPP_EMPA_LINA          | 36248787          | Clinical Dose Group | empagliflozin / Linagliptin Oral Product                         | 1602106            | 20160801                        | 20991231                      |
| SGLDPP_EMPA_LINA          | 36248788          | Clinical Dose Group | empagliflozin / Linagliptin Pill                                 | 1602107            | 20160801                        | 20991231                      |
| SGLDPP_EMPA_LINA          | 45892172          | Clinical Drug       | empagliflozin 10 MG / Linagliptin 5 MG Oral Tablet               | 1602109            | 20150302                        | 20991231                      |
| SGLDPP_EMPA_LINA          | 45892177          | Clinical Drug       | empagliflozin 25 MG / Linagliptin 5 MG Oral Tablet               | 1602118            | 20150302                        | 20991231                      |
| SGLDPP_EMPA_LINA          | 45892171          | Clinical Drug Form  | empagliflozin / Linagliptin Oral Tablet                          | 1602108            | 20150302                        | 20991231                      |
| SGLDPP_ERTU_SITA          | 793322            | Brand Name          | Steglatro                                                        | 1992811            | 20180205                        | 20991231                      |
| SGLDPP_ERTU_SITA          | 793325            | Branded Dose Group  | Steglatro Oral Product                                           | 1992814            | 20180205                        | 20991231                      |
| SGLDPP_ERTU_SITA          | 793326            | Branded Dose Group  | Steglatro Pill                                                   | 1992815            | 20180205                        | 20991231                      |
| SGLDPP_ERTU_SITA          | 793341            | Branded Drug        | ertugliflozin 15 MG / sitagliptin 100 MG Oral Tablet [Steglujan] | 1992832            | 20180205                        | 20991231                      |
| SGLDPP_ERTU_SITA          | 793331            | Branded Drug        | ertugliflozin 15 MG Oral Tablet [Steglatro]                      | 1992821            | 20180205                        | 20991231                      |
| SGLDPP_ERTU_SITA          | 793344            | Branded Drug        | ertugliflozin 5 MG / sitagliptin 100 MG Oral Tablet [Steglujan]  | 1992837            | 20180205                        | 20991231                      |
| SGLDPP_ERTU_SITA          | 793327            | Branded Drug        | ertugliflozin 5 MG Oral Tablet [Steglatro]                       | 1992816            | 20180205                        | 20991231                      |
| SGLDPP_ERTU_SITA          | 793337            | Branded Drug Comp   | ertugliflozin 15 MG / sitagliptin 100 MG [Steglujan]             | 1992828            | 20180205                        | 20991231                      |
| SGLDPP_ERTU_SITA          | 793330            | Branded Drug Comp   | ertugliflozin 15 MG [Steglatro]                                  | 1992820            | 20180205                        | 20991231                      |
| SGLDPP_ERTU_SITA          | 793343            | Branded Drug Comp   | ertugliflozin 5 MG / sitagliptin 100 MG [Steglujan]              | 1992836            | 20180205                        | 20991231                      |
| SGLDPP_ERTU_SITA          | 793323            | Branded Drug Comp   | ertugliflozin 5 MG [Steglatro]                                   | 1992812            | 20180205                        | 20991231                      |
| SGLDPP_ERTU_SITA          | 793338            | Branded Drug Form   | ertugliflozin / sitagliptin Oral Tablet [Steglujan]              | 1992829            | 20180205                        | 20991231                      |
| SGLDPP_ERTU_SITA          | 793324            | Branded Drug Form   | ertugliflozin Oral Tablet [Steglatro]                            | 1992813            | 20180205                        | 20991231                      |
| SGLDPP_ERTU_SITA          | 793332            | Clinical Dose Group | ertugliflozin / sitagliptin Oral Product                         | 1992822            | 20180205                        | 20991231                      |
| SGLDPP_ERTU_SITA          | 793333            | Clinical Dose Group | ertugliflozin / sitagliptin Pill                                 | 1992823            | 20180205                        | 20991231                      |
| SGLDPP_ERTU_SITA          | 793335            | Clinical Drug       | ertugliflozin 15 MG / sitagliptin 100 MG Oral Tablet             | 1992826            | 20180205                        | 20991231                      |
| SGLDPP_ERTU_SITA          | 793342            | Clinical Drug       | ertugliflozin 5 MG / sitagliptin 100 MG Oral Tablet              | 1992835            | 20180205                        | 20991231                      |
| SGLDPP_ERTU_SITA          | 793334            | Clinical Drug Form  | ertugliflozin / sitagliptin Oral Tablet                          | 1992824            | 20180205                        | 20991231                      |
| SGLT2_CANA_V2             | 43526233          | Brand Name          | Invokana                                                         | 1373464            | 20130506                        | 20991231                      |
| SGLT2_CANA_V2             | 36246430          | Branded Dose Group  | Invokana Oral Product                                            | 1373467            | 20160801                        | 20991231                      |
| SGLT2_CANA_V2             | 36246431          | Branded Dose Group  | Invokana Pill                                                    | 1373468            | 20160801                        | 20991231                      |
| SGLT2_CANA_V2             | 43526468          | Branded Drug        | canagliflozin 100 MG Oral Tablet [Invokana]                      | 1373469            | 20130506                        | 20991231                      |
| SGLT2_CANA_V2             | 43526472          | Branded Drug        | canagliflozin 300 MG Oral Tablet [Invokana]                      | 1373473            | 20130506                        | 20991231                      |
| SGLT2_CANA_V2             | 43526469          | Branded Drug Comp   | canagliflozin 100 MG [Invokana]                                  | 1373465            | 20130506                        | 20991231                      |
| SGLT2_CANA_V2             | 43526473          | Branded Drug Comp   | canagliflozin 300 MG [Invokana]                                  | 1373472            | 20130506                        | 20991231                      |
| SGLT2_CANA_V2             | 43526475          | Branded Drug Form   | canagliflozin Oral Tablet [Invokana]                             | 1373466            | 20130506                        | 20991231                      |
| SGLT2_CANA_V2             | 36246400          | Clinical Dose Group | canagliflozin Oral Product                                       | 1373460            | 20160801                        | 20991231                      |
| SGLT2_CANA_V2             | 36246401          | Clinical Dose Group | canagliflozin Pill                                               | 1373461            | 20160801                        | 20991231                      |

| <b>Broader Drug Class</b> | <b>Concept ID</b> | <b>Class Type</b>   | <b>Trade or Brand Name</b>                      | <b>RX CUI Code</b> | <b>Start Date of Valid Code</b> | <b>End Date of Valid Code</b> |
|---------------------------|-------------------|---------------------|-------------------------------------------------|--------------------|---------------------------------|-------------------------------|
| SGLT2_CANA_V2             | 43526467          | Clinical Drug       | canagliflozin 100 MG Oral Tablet                | 1373463            | 20130506                        | 20991231                      |
| SGLT2_CANA_V2             | 43526471          | Clinical Drug       | canagliflozin 300 MG Oral Tablet                | 1373471            | 20130506                        | 20991231                      |
| SGLT2_CANA_V2             | 43526466          | Clinical Drug Comp  | canagliflozin 100 MG                            | 1373459            | 20130506                        | 20991231                      |
| SGLT2_CANA_V2             | 45774708          | Clinical Drug Comp  | canagliflozin 150 MG                            | 1545145            | 20141201                        | 20991231                      |
| SGLT2_CANA_V2             | 43526470          | Clinical Drug Comp  | canagliflozin 300 MG                            | 1373470            | 20130506                        | 20991231                      |
| SGLT2_CANA_V2             | 45774718          | Clinical Drug Comp  | canagliflozin 50 MG                             | 1545160            | 20141201                        | 20991231                      |
| SGLT2_CANA_V2             | 43526474          | Clinical Drug Form  | canagliflozin Oral Tablet                       | 1373462            | 20130506                        | 20991231                      |
| SGLT2_CANA_V2             | 43526465          | Ingredient          | canagliflozin                                   | 1373458            | 20130506                        | 20991231                      |
| SGLT2_CANA_V2             | 46274925          | Precise Ingredient  | canagliflozin anhydrous                         | 1546031            | 20150908                        | 20991231                      |
| SGLT2_DAPA_V2             | 44785198          | Brand Name          | Farxiga                                         | 1486972            | 20140203                        | 20991231                      |
| SGLT2_DAPA_V2             | 36247907          | Branded Dose Group  | Farxiga Oral Product                            | 1486975            | 20160801                        | 20991231                      |
| SGLT2_DAPA_V2             | 36247908          | Branded Dose Group  | Farxiga Pill                                    | 1486976            | 20160801                        | 20991231                      |
| SGLT2_DAPA_V2             | 44785473          | Branded Drug        | dapagliflozin 10 MG Oral Tablet [Farxiga]       | 1486977            | 20140203                        | 20991231                      |
| SGLT2_DAPA_V2             | 44785477          | Branded Drug        | dapagliflozin 5 MG Oral Tablet [Farxiga]        | 1486981            | 20140203                        | 20991231                      |
| SGLT2_DAPA_V2             | 44816049          | Branded Drug Comp   | dapagliflozin 10 MG [Farxiga]                   | 1534397            | 20140505                        | 20991231                      |
| SGLT2_DAPA_V2             | 44815996          | Branded Drug Comp   | dapagliflozin 5 MG [Farxiga]                    | 1534344            | 20140505                        | 20991231                      |
| SGLT2_DAPA_V2             | 44785474          | Branded Drug Comp   | dapagliflozin propanediol 10 MG [Farxiga]       | 1486973            | 20140203                        | 20140505                      |
| SGLT2_DAPA_V2             | 44785478          | Branded Drug Comp   | dapagliflozin propanediol 5 MG [Farxiga]        | 1486980            | 20140203                        | 20140505                      |
| SGLT2_DAPA_V2             | 44815995          | Branded Drug Form   | dapagliflozin Oral Tablet [Farxiga]             | 1534343            | 20140505                        | 20991231                      |
| SGLT2_DAPA_V2             | 44785480          | Branded Drug Form   | dapagliflozin propanediol Oral Tablet [Farxiga] | 1486974            | 20140203                        | 20140505                      |
| SGLT2_DAPA_V2             | 36247667          | Clinical Dose Group | dapagliflozin Oral Product                      | 1488566            | 20160801                        | 20991231                      |
| SGLT2_DAPA_V2             | 36247668          | Clinical Dose Group | dapagliflozin Pill                              | 1488567            | 20160801                        | 20991231                      |
| SGLT2_DAPA_V2             | 44785831          | Clinical Drug       | dapagliflozin 10 MG Oral Tablet                 | 1488569            | 20140303                        | 20991231                      |
| SGLT2_DAPA_V2             | 44785833          | Clinical Drug       | dapagliflozin 5 MG Oral Tablet                  | 1488574            | 20140303                        | 20991231                      |
| SGLT2_DAPA_V2             | 44785472          | Clinical Drug       | dapagliflozin propanediol 10 MG Oral Tablet     | 1486971            | 20140203                        | 20140505                      |
| SGLT2_DAPA_V2             | 44785476          | Clinical Drug       | dapagliflozin propanediol 5 MG Oral Tablet      | 1486979            | 20140203                        | 20140505                      |
| SGLT2_DAPA_V2             | 44785830          | Clinical Drug Comp  | dapagliflozin 10 MG                             | 1488565            | 20140303                        | 20991231                      |
| SGLT2_DAPA_V2             | 793825            | Clinical Drug Comp  | dapagliflozin 2.5 MG                            | 1940495            | 20180205                        | 20991231                      |
| SGLT2_DAPA_V2             | 44785832          | Clinical Drug Comp  | dapagliflozin 5 MG                              | 1488573            | 20140303                        | 20991231                      |
| SGLT2_DAPA_V2             | 44785471          | Clinical Drug Comp  | dapagliflozin propanediol 10 MG                 | 1486967            | 20140203                        | 20140505                      |
| SGLT2_DAPA_V2             | 44785475          | Clinical Drug Comp  | dapagliflozin propanediol 5 MG                  | 1486978            | 20140203                        | 20140505                      |
| SGLT2_DAPA_V2             | 44785834          | Clinical Drug Form  | dapagliflozin Oral Tablet                       | 1488568            | 20140303                        | 20991231                      |
| SGLT2_DAPA_V2             | 44785479          | Clinical Drug Form  | dapagliflozin propanediol Oral Tablet           | 1486970            | 20140203                        | 20140505                      |
| SGLT2_DAPA_V2             | 44785829          | Ingredient          | dapagliflozin                                   | 1488564            | 20140303                        | 20991231                      |
| SGLT2_DAPA_V2             | 44785470          | Precise Ingredient  | dapagliflozin propanediol                       | 1486966            | 20140203                        | 20991231                      |
| SGLT2_EMPA_V2             | 45774755          | Brand Name          | Jardiance                                       | 1545659            | 20141201                        | 20991231                      |
| SGLT2_EMPA_V2             | 36246886          | Branded Dose Group  | Jardiance Oral Product                          | 1545662            | 20160801                        | 20991231                      |
| SGLT2_EMPA_V2             | 36246887          | Branded Dose Group  | Jardiance Pill                                  | 1545663            | 20160801                        | 20991231                      |
| SGLT2_EMPA_V2             | 45774758          | Branded Drug        | empagliflozin 10 MG Oral Tablet [Jardiance]     | 1545664            | 20141201                        | 20991231                      |

| <b>Broader Drug Class</b> | <b>Concept ID</b> | <b>Class Type</b>   | <b>Trade or Brand Name</b>                    | <b>RX CUI Code</b> | <b>Start Date of Valid Code</b> | <b>End Date of Valid Code</b> |
|---------------------------|-------------------|---------------------|-----------------------------------------------|--------------------|---------------------------------|-------------------------------|
| SGLT2_EMPA_V2             | 45774895          | Branded Drug        | empagliflozin 25 MG Oral Tablet [Jardiance]   | 1545668            | 20141201                        | 20991231                      |
| SGLT2_EMPA_V2             | 45774756          | Branded Drug Comp   | empagliflozin 10 MG [Jardiance]               | 1545660            | 20141201                        | 20991231                      |
| SGLT2_EMPA_V2             | 45774894          | Branded Drug Comp   | empagliflozin 25 MG [Jardiance]               | 1545667            | 20141201                        | 20991231                      |
| SGLT2_EMPA_V2             | 45774757          | Branded Drug Form   | empagliflozin Oral Tablet [Jardiance]         | 1545661            | 20141201                        | 20991231                      |
| SGLT2_EMPA_V2             | 36246884          | Clinical Dose Group | empagliflozin Oral Product                    | 1545655            | 20160801                        | 20991231                      |
| SGLT2_EMPA_V2             | 36246885          | Clinical Dose Group | empagliflozin Pill                            | 1545656            | 20160801                        | 20991231                      |
| SGLT2_EMPA_V2             | 45774754          | Clinical Drug       | empagliflozin 10 MG Oral Tablet               | 1545658            | 20141201                        | 20991231                      |
| SGLT2_EMPA_V2             | 45774893          | Clinical Drug       | empagliflozin 25 MG Oral Tablet               | 1545666            | 20141201                        | 20991231                      |
| SGLT2_EMPA_V2             | 45774752          | Clinical Drug Comp  | empagliflozin 10 MG                           | 1545654            | 20141201                        | 20991231                      |
| SGLT2_EMPA_V2             | 46287685          | Clinical Drug Comp  | empagliflozin 12.5 MG                         | 1664322            | 20151005                        | 20991231                      |
| SGLT2_EMPA_V2             | 45774759          | Clinical Drug Comp  | empagliflozin 25 MG                           | 1545665            | 20141201                        | 20991231                      |
| SGLT2_EMPA_V2             | 46287678          | Clinical Drug Comp  | empagliflozin 5 MG                            | 1664310            | 20151005                        | 20991231                      |
| SGLT2_EMPA_V2             | 45774753          | Clinical Drug Form  | empagliflozin Oral Tablet                     | 1545657            | 20141201                        | 20991231                      |
| SGLT2_EMPA_V2             | 45774751          | Ingredient          | empagliflozin                                 | 1545653            | 20141201                        | 20991231                      |
| SUL1GEN                   | 19021491          | Brand Name          | Diabinese                                     | 151616             | 19700101                        | 20991231                      |
| SUL1GEN                   | 19088425          | Brand Name          | Dymelor                                       | 227211             | 19700101                        | 20991231                      |
| SUL1GEN                   | 19071136          | Brand Name          | Insulase                                      | 542029             | 20050911                        | 20991231                      |
| SUL1GEN                   | 19047640          | Brand Name          | Orinase                                       | 203681             | 19700101                        | 20991231                      |
| SUL1GEN                   | 19075974          | Brand Name          | Orinase Diagnostic                            | 218942             | 19700101                        | 20991231                      |
| SUL1GEN                   | 19082948          | Brand Name          | Tolinase                                      | 220338             | 19700101                        | 20991231                      |
| SUL1GEN                   | 19034782          | Brand Name          | Tol-Tab                                       | 353028             | 19700101                        | 20991231                      |
| SUL1GEN                   | 36231727          | Branded Dose Group  | Diabinese Oral Product                        | 1176496            | 20160801                        | 20991231                      |
| SUL1GEN                   | 36231728          | Branded Dose Group  | Diabinese Pill                                | 1176497            | 20160801                        | 20991231                      |
| SUL1GEN                   | 36235641          | Branded Dose Group  | Dymelor Oral Product                          | 1169680            | 20160801                        | 20991231                      |
| SUL1GEN                   | 36235642          | Branded Dose Group  | Dymelor Pill                                  | 1169681            | 20160801                        | 20991231                      |
| SUL1GEN                   | 36233236          | Branded Dose Group  | Insulase Oral Product                         | 1173427            | 20160801                        | 20991231                      |
| SUL1GEN                   | 36233237          | Branded Dose Group  | Insulase Pill                                 | 1173428            | 20160801                        | 20991231                      |
| SUL1GEN                   | 36242644          | Branded Dose Group  | Orinase Diagnostic Injectable Product         | 1183952            | 20160801                        | 20991231                      |
| SUL1GEN                   | 36242646          | Branded Dose Group  | Orinase Oral Product                          | 1183954            | 20160801                        | 20991231                      |
| SUL1GEN                   | 36242650          | Branded Dose Group  | Orinase Pill                                  | 1183958            | 20160801                        | 20991231                      |
| SUL1GEN                   | 36230840          | Branded Dose Group  | Tolinase Oral Product                         | 1177973            | 20160801                        | 20991231                      |
| SUL1GEN                   | 36230841          | Branded Dose Group  | Tolinase Pill                                 | 1177974            | 20160801                        | 20991231                      |
| SUL1GEN                   | 36229273          | Branded Dose Group  | Tol-Tab Oral Product                          | 1179112            | 20160801                        | 20991231                      |
| SUL1GEN                   | 36229274          | Branded Dose Group  | Tol-Tab Pill                                  | 1179113            | 20160801                        | 20991231                      |
| SUL1GEN                   | 19048692          | Branded Drug        | Acetohexamide 250 MG Oral Tablet [Dymelor]    | 214106             | 19700101                        | 20991231                      |
| SUL1GEN                   | 19048693          | Branded Drug        | Acetohexamide 500 MG Oral Tablet [Dymelor]    | 214107             | 19700101                        | 20991231                      |
| SUL1GEN                   | 19006907          | Branded Drug        | Chlorpropamide 100 MG Oral Tablet [Diabinese] | 105369             | 19700101                        | 20991231                      |
| SUL1GEN                   | 19025944          | Branded Drug        | Chlorpropamide 250 MG Oral Tablet [Diabinese] | 201919             | 19700101                        | 20991231                      |
| SUL1GEN                   | 19113846          | Branded Drug        | Chlorpropamide 250 MG Oral Tablet [Insulase]  | 542032             | 20050911                        | 20991231                      |



| <b>Broader Drug Class</b> | <b>Concept ID</b> | <b>Class Type</b>   | <b>Trade or Brand Name</b>                                    | <b>RX CUI Code</b> | <b>Start Date of Valid Code</b> | <b>End Date of Valid Code</b> |
|---------------------------|-------------------|---------------------|---------------------------------------------------------------|--------------------|---------------------------------|-------------------------------|
| SUL1GEN                   | 19036965          | Branded Drug        | Tolazamide 100 MG Oral Tablet [Tolinase]                      | 207953             | 19700101                        | 20991231                      |
| SUL1GEN                   | 19036966          | Branded Drug        | Tolazamide 250 MG Oral Tablet [Tolinase]                      | 207954             | 19700101                        | 20991231                      |
| SUL1GEN                   | 19036967          | Branded Drug        | Tolazamide 500 MG Oral Tablet [Tolinase]                      | 207955             | 19700101                        | 20991231                      |
| SUL1GEN                   | 19040829          | Branded Drug        | Tolbutamide 50 MG/ML Injectable Solution [Orinase Diagnostic] | 209204             | 19700101                        | 20991231                      |
| SUL1GEN                   | 19037213          | Branded Drug        | Tolbutamide 500 MG Oral Tablet [Orinase]                      | 208012             | 19700101                        | 20991231                      |
| SUL1GEN                   | 1502916           | Branded Drug        | Tolbutamide 500 MG Oral Tablet [Tol-Tab]                      | 351452             | 19700101                        | 20991231                      |
| SUL1GEN                   | 19088426          | Branded Drug Comp   | Acetohexamide 250 MG [Dymelor]                                | 573945             | 20050911                        | 20991231                      |
| SUL1GEN                   | 19088427          | Branded Drug Comp   | Acetohexamide 500 MG [Dymelor]                                | 573946             | 20050911                        | 20991231                      |
| SUL1GEN                   | 19116145          | Branded Drug Comp   | Chlorpropamide 100 MG [Diabinese]                             | 564035             | 20050911                        | 20991231                      |
| SUL1GEN                   | 19117691          | Branded Drug Comp   | Chlorpropamide 250 MG [Diabinese]                             | 566055             | 20050911                        | 20991231                      |
| SUL1GEN                   | 19113845          | Branded Drug Comp   | Chlorpropamide 250 MG [Insulase]                              | 542030             | 20050911                        | 20991231                      |
| SUL1GEN                   | 19082949          | Branded Drug Comp   | Tolazamide 100 MG [Tolinase]                                  | 568684             | 20050911                        | 20991231                      |
| SUL1GEN                   | 19082950          | Branded Drug Comp   | Tolazamide 250 MG [Tolinase]                                  | 568685             | 20050911                        | 20991231                      |
| SUL1GEN                   | 19082961          | Branded Drug Comp   | Tolazamide 500 MG [Tolinase]                                  | 568686             | 20050911                        | 20991231                      |
| SUL1GEN                   | 19075975          | Branded Drug Comp   | Tolbutamide 50 MG/ML [Orinase Diagnostic]                     | 569831             | 20050911                        | 20991231                      |
| SUL1GEN                   | 19047751          | Branded Drug Comp   | Tolbutamide 500 MG [Orinase]                                  | 568742             | 20050911                        | 20991231                      |
| SUL1GEN                   | 19034783          | Branded Drug Comp   | Tolbutamide 500 MG [Tol-Tab]                                  | 575377             | 20050911                        | 20991231                      |
| SUL1GEN                   | 40004924          | Branded Drug Form   | Acetohexamide Oral Tablet [Dymelor]                           | 368696             | 19700101                        | 20991231                      |
| SUL1GEN                   | 40030457          | Branded Drug Form   | Chlorpropamide Oral Tablet [Diabinese]                        | 368714             | 19700101                        | 20991231                      |
| SUL1GEN                   | 40108537          | Branded Drug Form   | Chlorpropamide Oral Tablet [Insulase]                         | 542031             | 20050911                        | 20991231                      |
| SUL1GEN                   | 40089090          | Branded Drug Form   | Tolazamide Oral Tablet [Tolinase]                             | 369304             | 19700101                        | 20991231                      |
| SUL1GEN                   | 40089114          | Branded Drug Form   | Tolbutamide Injectable Solution [Orinase Diagnostic]          | 362611             | 19700101                        | 20991231                      |
| SUL1GEN                   | 40089116          | Branded Drug Form   | Tolbutamide Oral Tablet [Orinase]                             | 369297             | 19700101                        | 20991231                      |
| SUL1GEN                   | 40089117          | Branded Drug Form   | Tolbutamide Oral Tablet [Tol-Tab]                             | 368586             | 19700101                        | 20991231                      |
| SUL1GEN                   | 36216774          | Clinical Dose Group | Acetohexamide Oral Product                                    | 1153126            | 20160801                        | 20991231                      |
| SUL1GEN                   | 36216775          | Clinical Dose Group | Acetohexamide Pill                                            | 1153127            | 20160801                        | 20991231                      |
| SUL1GEN                   | 36214131          | Clinical Dose Group | Tolazamide Oral Product                                       | 1157121            | 20160801                        | 20991231                      |
| SUL1GEN                   | 36214132          | Clinical Dose Group | Tolazamide Pill                                               | 1157122            | 20160801                        | 20991231                      |
| SUL1GEN                   | 36214385          | Clinical Dose Group | Tolbutamide Injectable Product                                | 1157642            | 20160801                        | 20991231                      |
| SUL1GEN                   | 36214386          | Clinical Dose Group | Tolbutamide Oral Product                                      | 1157643            | 20160801                        | 20991231                      |
| SUL1GEN                   | 36214387          | Clinical Dose Group | Tolbutamide Pill                                              | 1157644            | 20160801                        | 20991231                      |
| SUL1GEN                   | 19018783          | Clinical Drug       | Acetohexamide 250 MG Oral Tablet                              | 197306             | 19700101                        | 20991231                      |
| SUL1GEN                   | 19018784          | Clinical Drug       | Acetohexamide 500 MG Oral Tablet                              | 197307             | 19700101                        | 20991231                      |
| SUL1GEN                   | 1502810           | Clinical Drug       | Tolazamide 100 MG Oral Tablet                                 | 198291             | 19700101                        | 20991231                      |
| SUL1GEN                   | 1502816           | Clinical Drug       | Tolazamide 250 MG Oral Capsule                                | 313418             | 19700101                        | 20991231                      |
| SUL1GEN                   | 1502811           | Clinical Drug       | Tolazamide 250 MG Oral Tablet                                 | 198292             | 19700101                        | 20991231                      |
| SUL1GEN                   | 1502812           | Clinical Drug       | Tolazamide 500 MG Oral Tablet                                 | 198293             | 19700101                        | 20991231                      |
| SUL1GEN                   | 1502859           | Clinical Drug       | Tolbutamide 1000 MG Oral Tablet                               | 245266             | 19700101                        | 20991231                      |
| SUL1GEN                   | 1502860           | Clinical Drug       | Tolbutamide 250 MG Oral Tablet                                | 313419             | 19700101                        | 20991231                      |

| <b>Broader Drug Class</b> | <b>Concept ID</b> | <b>Class Type</b>   | <b>Trade or Brand Name</b>               | <b>RX CUI Code</b> | <b>Start Date of Valid Code</b> | <b>End Date of Valid Code</b> |
|---------------------------|-------------------|---------------------|------------------------------------------|--------------------|---------------------------------|-------------------------------|
| SUL1GEN                   | 1502861           | Clinical Drug       | Tolbutamide 50 MG/ML Injectable Solution | 315239             | 19700101                        | 20991231                      |
| SUL1GEN                   | 1502856           | Clinical Drug       | Tolbutamide 500 MG Oral Tablet           | 198294             | 19700101                        | 20991231                      |
| SUL1GEN                   | 1530019           | Clinical Drug Comp  | Acetohexamide 250 MG                     | 315273             | 19700101                        | 20991231                      |
| SUL1GEN                   | 1530020           | Clinical Drug Comp  | Acetohexamide 500 MG                     | 315274             | 19700101                        | 20991231                      |
| SUL1GEN                   | 1502817           | Clinical Drug Comp  | Tolazamide 100 MG                        | 316832             | 19700101                        | 20991231                      |
| SUL1GEN                   | 1502818           | Clinical Drug Comp  | Tolazamide 250 MG                        | 316833             | 19700101                        | 20991231                      |
| SUL1GEN                   | 1502819           | Clinical Drug Comp  | Tolazamide 500 MG                        | 316834             | 19700101                        | 20991231                      |
| SUL1GEN                   | 1502914           | Clinical Drug Comp  | Tolbutamide 1000 MG                      | 328851             | 19700101                        | 20991231                      |
| SUL1GEN                   | 1502912           | Clinical Drug Comp  | Tolbutamide 250 MG                       | 316835             | 19700101                        | 20991231                      |
| SUL1GEN                   | 1502915           | Clinical Drug Comp  | Tolbutamide 50 MG/ML                     | 333394             | 19700101                        | 20991231                      |
| SUL1GEN                   | 1502913           | Clinical Drug Comp  | Tolbutamide 500 MG                       | 316836             | 19700101                        | 20991231                      |
| SUL1GEN                   | 40004923          | Clinical Drug Form  | Acetohexamide Oral Tablet                | 370529             | 19700101                        | 20991231                      |
| SUL1GEN                   | 40089088          | Clinical Drug Form  | Tolazamide Oral Capsule                  | 375952             | 19700101                        | 20991231                      |
| SUL1GEN                   | 40089089          | Clinical Drug Form  | Tolazamide Oral Tablet                   | 374149             | 19700101                        | 20991231                      |
| SUL1GEN                   | 40089113          | Clinical Drug Form  | Tolbutamide Injectable Solution          | 376868             | 19700101                        | 20991231                      |
| SUL1GEN                   | 40089115          | Clinical Drug Form  | Tolbutamide Oral Tablet                  | 374152             | 19700101                        | 20991231                      |
| SUL1GEN                   | 1530014           | Ingredient          | Acetohexamide                            | 173                | 19700101                        | 20991231                      |
| SUL1GEN                   | 1502809           | Ingredient          | Tolazamide                               | 10633              | 19700101                        | 20991231                      |
| SUL1GEN                   | 1502855           | Ingredient          | Tolbutamide                              | 10635              | 19700101                        | 20991231                      |
| SUL1GEN                   | 19052613          | Precise Ingredient  | Tolbutamide sodium                       | 221173             | 19700101                        | 20991231                      |
| SUL2GEN_GLIME_V2          | 19023584          | Brand Name          | Amaryl                                   | 153592             | 19700101                        | 20991231                      |
| SUL2GEN_GLIME_V2          | 36234085          | Branded Dose Group  | Amaryl Oral Product                      | 1170663            | 20160801                        | 20991231                      |
| SUL2GEN_GLIME_V2          | 36234086          | Branded Dose Group  | Amaryl Pill                              | 1170664            | 20160801                        | 20991231                      |
| SUL2GEN_GLIME_V2          | 1597759           | Branded Drug        | glimepiride 1 MG Oral Tablet [Amaryl]    | 153843             | 19700101                        | 20991231                      |
| SUL2GEN_GLIME_V2          | 1597757           | Branded Drug        | glimepiride 2 MG Oral Tablet [Amaryl]    | 153591             | 19700101                        | 20991231                      |
| SUL2GEN_GLIME_V2          | 19018043          | Branded Drug        | glimepiride 3 MG Oral Tablet [Amaryl]    | 153844             | 19700101                        | 20991231                      |
| SUL2GEN_GLIME_V2          | 1597760           | Branded Drug        | glimepiride 4 MG Oral Tablet [Amaryl]    | 153845             | 19700101                        | 20991231                      |
| SUL2GEN_GLIME_V2          | 19117198          | Branded Drug Comp   | glimepiride 1 MG [Amaryl]                | 565408             | 20050911                        | 20991231                      |
| SUL2GEN_GLIME_V2          | 19023585          | Branded Drug Comp   | glimepiride 2 MG [Amaryl]                | 565327             | 20050911                        | 20991231                      |
| SUL2GEN_GLIME_V2          | 19117199          | Branded Drug Comp   | glimepiride 3 MG [Amaryl]                | 565409             | 20050911                        | 20991231                      |
| SUL2GEN_GLIME_V2          | 19117200          | Branded Drug Comp   | glimepiride 4 MG [Amaryl]                | 565410             | 20050911                        | 20991231                      |
| SUL2GEN_GLIME_V2          | 40059666          | Branded Drug Form   | glimepiride Oral Tablet [Amaryl]         | 367762             | 19700101                        | 20991231                      |
| SUL2GEN_GLIME_V2          | 36214984          | Clinical Dose Group | glimepiride Oral Product                 | 1157244            | 20160801                        | 20991231                      |
| SUL2GEN_GLIME_V2          | 36214985          | Clinical Dose Group | glimepiride Pill                         | 1157245            | 20160801                        | 20991231                      |
| SUL2GEN_GLIME_V2          | 1597761           | Clinical Drug       | glimepiride 1 MG Oral Tablet             | 199245             | 19700101                        | 20991231                      |
| SUL2GEN_GLIME_V2          | 1597772           | Clinical Drug       | glimepiride 2 MG Oral Tablet             | 199246             | 19700101                        | 20991231                      |
| SUL2GEN_GLIME_V2          | 1597758           | Clinical Drug       | glimepiride 3 MG Oral Tablet             | 153842             | 19700101                        | 20991231                      |
| SUL2GEN_GLIME_V2          | 1597773           | Clinical Drug       | glimepiride 4 MG Oral Tablet             | 199247             | 19700101                        | 20991231                      |
| SUL2GEN_GLIME_V2          | 43011830          | Clinical Drug       | glimepiride 6 MG Oral Tablet             | 1361493            | 20130107                        | 20991231                      |

| <b>Broader Drug Class</b> | <b>Concept ID</b> | <b>Class Type</b>  | <b>Trade or Brand Name</b>                                      | <b>RX CUI Code</b> | <b>Start Date of Valid Code</b> | <b>End Date of Valid Code</b> |
|---------------------------|-------------------|--------------------|-----------------------------------------------------------------|--------------------|---------------------------------|-------------------------------|
| SUL2GEN_GLIME_V2          | 43011831          | Clinical Drug      | glimepiride 8 MG Oral Tablet                                    | 1361495            | 20130107                        | 20991231                      |
| SUL2GEN_GLIME_V2          | 1597774           | Clinical Drug Comp | glimepiride 1 MG                                                | 315978             | 19700101                        | 20991231                      |
| SUL2GEN_GLIME_V2          | 1597776           | Clinical Drug Comp | glimepiride 2 MG                                                | 317637             | 19700101                        | 20991231                      |
| SUL2GEN_GLIME_V2          | 19100593          | Clinical Drug Comp | glimepiride 3 MG                                                | 380849             | 19700101                        | 20991231                      |
| SUL2GEN_GLIME_V2          | 1597775           | Clinical Drug Comp | glimepiride 4 MG                                                | 315979             | 19700101                        | 20991231                      |
| SUL2GEN_GLIME_V2          | 43011498          | Clinical Drug Comp | glimepiride 6 MG                                                | 1361492            | 20130107                        | 20991231                      |
| SUL2GEN_GLIME_V2          | 43011499          | Clinical Drug Comp | glimepiride 8 MG                                                | 1361494            | 20130107                        | 20991231                      |
| SUL2GEN_GLIME_V2          | 40059665          | Clinical Drug Form | glimepiride Oral Tablet                                         | 372319             | 19700101                        | 20991231                      |
| SUL2GEN_GLIME_V2          | 1597756           | Ingredient         | glimepiride                                                     | 25789              | 19700101                        | 20991231                      |
| SUL2GEN_GLIP_V2           | 19047637          | Brand Name         | Glucotrol                                                       | 203680             | 19700101                        | 20991231                      |
| SUL2GEN_GLIP_V2           | 19067100          | Brand Name         | Glucotrol XL                                                    | 217360             | 19700101                        | 20991231                      |
| SUL2GEN_GLIP_V2           | 36235748          | Branded Dose Group | Glucotrol Oral Product                                          | 1171246            | 20160801                        | 20991231                      |
| SUL2GEN_GLIP_V2           | 36235749          | Branded Dose Group | Glucotrol Pill                                                  | 1171247            | 20160801                        | 20991231                      |
| SUL2GEN_GLIP_V2           | 19030446          | Branded Drug       | Glipizide 10 MG 24 Hour Extended Release Tablet [Glucotrol XL]  | 205831             | 19700101                        | 20091031                      |
| SUL2GEN_GLIP_V2           | 40167634          | Branded Drug       | Glipizide 10 MG Extended Release Oral Tablet [Glucotrol]        | 865569             | 20091101                        | 20991231                      |
| SUL2GEN_GLIP_V2           | 19134318          | Branded Drug       | Glipizide 10 MG Extended Release Tablet [Glucotrol XL]          | 844499             | 20090503                        | 20091031                      |
| SUL2GEN_GLIP_V2           | 19030445          | Branded Drug       | Glipizide 10 MG Oral Tablet [Glucotrol]                         | 205830             | 19700101                        | 20991231                      |
| SUL2GEN_GLIP_V2           | 1560196           | Branded Drug       | Glipizide 2.5 MG 24 Hour Extended Release Tablet [Glucotrol XL] | 261311             | 19700101                        | 20091031                      |
| SUL2GEN_GLIP_V2           | 40167635          | Branded Drug       | Glipizide 2.5 MG Extended Release Oral Tablet [Glucotrol]       | 865572             | 20091101                        | 20991231                      |
| SUL2GEN_GLIP_V2           | 19134585          | Branded Drug       | Glipizide 2.5 MG Extended Release Tablet [Glucotrol XL]         | 844769             | 20090503                        | 20091031                      |
| SUL2GEN_GLIP_V2           | 19025947          | Branded Drug       | Glipizide 2.5 MG Oral Tablet [Minidiab]                         | 201922             | 19700101                        | 20991231                      |
| SUL2GEN_GLIP_V2           | 19030444          | Branded Drug       | Glipizide 5 MG 24 Hour Extended Release Tablet [Glucotrol XL]   | 205829             | 19700101                        | 20091031                      |
| SUL2GEN_GLIP_V2           | 40167637          | Branded Drug       | Glipizide 5 MG Extended Release Oral Tablet [Glucotrol]         | 865574             | 20091101                        | 20991231                      |
| SUL2GEN_GLIP_V2           | 19134317          | Branded Drug       | Glipizide 5 MG Extended Release Tablet [Glucotrol XL]           | 844498             | 20090503                        | 20091031                      |
| SUL2GEN_GLIP_V2           | 19025946          | Branded Drug       | Glipizide 5 MG Oral Tablet [Glibenese]                          | 201921             | 19700101                        | 20991231                      |
| SUL2GEN_GLIP_V2           | 19030443          | Branded Drug       | Glipizide 5 MG Oral Tablet [Glucotrol]                          | 205828             | 19700101                        | 20991231                      |
| SUL2GEN_GLIP_V2           | 19006910          | Branded Drug       | Glipizide 5 MG Oral Tablet [Minidiab]                           | 105373             | 19700101                        | 20991231                      |
| SUL2GEN_GLIP_V2           | 19067152          | Branded Drug Comp  | Glipizide 10 MG [Glucotrol XL]                                  | 566721             | 20050911                        | 20091101                      |
| SUL2GEN_GLIP_V2           | 19117945          | Branded Drug Comp  | Glipizide 10 MG [Glucotrol]                                     | 566720             | 20050911                        | 20991231                      |
| SUL2GEN_GLIP_V2           | 19067153          | Branded Drug Comp  | Glipizide 2.5 MG [Glucotrol XL]                                 | 574533             | 20050911                        | 20091031                      |
| SUL2GEN_GLIP_V2           | 40167636          | Branded Drug Comp  | Glipizide 2.5 MG [Glucotrol]                                    | 865570             | 20091101                        | 20991231                      |
| SUL2GEN_GLIP_V2           | 19117693          | Branded Drug Comp  | Glipizide 2.5 MG [Minidiab]                                     | 566057             | 20050911                        | 20991231                      |
| SUL2GEN_GLIP_V2           | 19117692          | Branded Drug Comp  | Glipizide 5 MG [Glibenese]                                      | 566056             | 20050911                        | 20991231                      |
| SUL2GEN_GLIP_V2           | 19067151          | Branded Drug Comp  | Glipizide 5 MG [Glucotrol XL]                                   | 566719             | 20050911                        | 20091101                      |
| SUL2GEN_GLIP_V2           | 19047638          | Branded Drug Comp  | Glipizide 5 MG [Glucotrol]                                      | 566718             | 20050911                        | 20991231                      |
| SUL2GEN_GLIP_V2           | 19116148          | Branded Drug Comp  | Glipizide 5 MG [Minidiab]                                       | 564038             | 20050911                        | 20991231                      |
| SUL2GEN_GLIP_V2           | 40044241          | Branded Drug Form  | Glipizide 24 Hour Extended Release Tablet [Glucotrol XL]        | 379801             | 19700101                        | 20091031                      |
| SUL2GEN_GLIP_V2           | 40167638          | Branded Drug Form  | Glipizide Extended Release Oral Tablet [Glucotrol]              | 865567             | 20091101                        | 20991231                      |
| SUL2GEN_GLIP_V2           | 40044252          | Branded Drug Form  | Glipizide Oral Tablet [Glibenese]                               | 379803             | 19700101                        | 20991231                      |

| <b>Broader Drug Class</b> | <b>Concept ID</b> | <b>Class Type</b>   | <b>Trade or Brand Name</b>                                      | <b>RX CUI Code</b> | <b>Start Date of Valid Code</b> | <b>End Date of Valid Code</b> |
|---------------------------|-------------------|---------------------|-----------------------------------------------------------------|--------------------|---------------------------------|-------------------------------|
| SUL2GEN_GLIP_V2           | 40044253          | Branded Drug Form   | Glipizide Oral Tablet [Glucotrol]                               | 369500             | 19700101                        | 20991231                      |
| SUL2GEN_GLIP_V2           | 40044254          | Branded Drug Form   | Glipizide Oral Tablet [Minidiab]                                | 379802             | 19700101                        | 20991231                      |
| SUL2GEN_GLIP_V2           | 36218767          | Clinical Dose Group | Glipizide Oral Product                                          | 1165207            | 20160801                        | 20991231                      |
| SUL2GEN_GLIP_V2           | 36218768          | Clinical Dose Group | Glipizide Pill                                                  | 1165208            | 20160801                        | 20991231                      |
| SUL2GEN_GLIP_V2           | 19134642          | Clinical Drug       | Glipizide 10 MG Extended Release Oral Tablet                    | 844827             | 20090503                        | 20991231                      |
| SUL2GEN_GLIP_V2           | 19077636          | Clinical Drug       | Glipizide 10 MG Oral Tablet                                     | 310488             | 19700101                        | 20991231                      |
| SUL2GEN_GLIP_V2           | 19134624          | Clinical Drug       | Glipizide 2.5 MG Extended Release Oral Tablet                   | 844809             | 20090503                        | 20991231                      |
| SUL2GEN_GLIP_V2           | 19100559          | Clinical Drug       | Glipizide 2.5 MG Oral Tablet                                    | 379804             | 19700101                        | 20991231                      |
| SUL2GEN_GLIP_V2           | 19134639          | Clinical Drug       | Glipizide 5 MG Extended Release Oral Tablet                     | 844824             | 20090503                        | 20991231                      |
| SUL2GEN_GLIP_V2           | 40139021          | Clinical Drug       | Glipizide 5 MG Extended Release Tablet                          | 700836             | 20070429                        | 20071230                      |
| SUL2GEN_GLIP_V2           | 19077638          | Clinical Drug       | Glipizide 5 MG Oral Tablet                                      | 310490             | 19700101                        | 20991231                      |
| SUL2GEN_GLIP_V2           | 1560233           | Clinical Drug Comp  | Glipizide 10 MG                                                 | 317379             | 19700101                        | 20991231                      |
| SUL2GEN_GLIP_V2           | 19085004          | Clinical Drug Comp  | Glipizide 2.5 MG                                                | 330349             | 19700101                        | 20991231                      |
| SUL2GEN_GLIP_V2           | 19081295          | Clinical Drug Comp  | Glipizide 5 MG                                                  | 315980             | 19700101                        | 20991231                      |
| SUL2GEN_GLIP_V2           | 40044240          | Clinical Drug Form  | Glipizide 24 Hour Extended Release Tablet                       | 379805             | 19700101                        | 20070701                      |
| SUL2GEN_GLIP_V2           | 40139022          | Clinical Drug Form  | Glipizide Extended Release Oral Tablet                          | 700835             | 20070429                        | 20991231                      |
| SUL2GEN_GLIP_V2           | 40044251          | Clinical Drug Form  | Glipizide Oral Tablet                                           | 372320             | 19700101                        | 20991231                      |
| SUL2GEN_GLIP_V2           | 1560171           | Ingredient          | Glipizide                                                       | 4821               | 19700101                        | 20991231                      |
| SUL2GEN_GLIP_V2           | 40166814          | Quant Branded Drug  | 24 HR Glipizide 10 MG Extended Release Oral Tablet [Glucotrol]  | 865568             | 20091101                        | 20991231                      |
| SUL2GEN_GLIP_V2           | 40166815          | Quant Branded Drug  | 24 HR Glipizide 2.5 MG Extended Release Oral Tablet [Glucotrol] | 865571             | 20091101                        | 20991231                      |
| SUL2GEN_GLIP_V2           | 40166816          | Quant Branded Drug  | 24 HR Glipizide 5 MG Extended Release Oral Tablet [Glucotrol]   | 865573             | 20091101                        | 20991231                      |
| SUL2GEN_GLIP_V2           | 19080793          | Quant Clinical Drug | 24 HR Glipizide 10 MG Extended Release Oral Tablet              | 315107             | 19700101                        | 20991231                      |
| SUL2GEN_GLIP_V2           | 19077637          | Quant Clinical Drug | 24 HR Glipizide 2.5 MG Extended Release Oral Tablet             | 310489             | 19700101                        | 20991231                      |
| SUL2GEN_GLIP_V2           | 19079990          | Quant Clinical Drug | 24 HR Glipizide 5 MG Extended Release Oral Tablet               | 314006             | 19700101                        | 20991231                      |
| SUL2GEN_GLYB_V2           | 19050436          |                     | GLYBURIDE                                                       |                    |                                 |                               |
| SUL2GEN_GLYB_V2           | 19013812          | Brand Name          | Calabren                                                        | 151466             | 19700101                        | 20991231                      |
| SUL2GEN_GLYB_V2           | 19045627          | Brand Name          | Diabeta                                                         | 203295             | 19700101                        | 20991231                      |
| SUL2GEN_GLYB_V2           | 19013975          | Brand Name          | Diabetamide                                                     | 151615             | 19700101                        | 20991231                      |
| SUL2GEN_GLYB_V2           | 19014117          | Brand Name          | Euglucon                                                        | 151725             | 19700101                        | 20991231                      |
| SUL2GEN_GLYB_V2           | 19125217          | Brand Name          | Glyburase                                                       | 669980             | 20061217                        | 20991231                      |
| SUL2GEN_GLYB_V2           | 40168379          | Brand Name          | Glynase                                                         | 881404             | 20091206                        | 20991231                      |
| SUL2GEN_GLYB_V2           | 19067193          | Brand Name          | Glynase Pres-Tab                                                | 217370             | 19700101                        | 20991231                      |
| SUL2GEN_GLYB_V2           | 19100479          | Brand Name          | Libanil                                                         | 379571             | 19700101                        | 20991231                      |
| SUL2GEN_GLYB_V2           | 19016162          | Brand Name          | Malix                                                           | 152651             | 19700101                        | 20991231                      |
| SUL2GEN_GLYB_V2           | 19045623          | Brand Name          | Micronase                                                       | 203289             | 19700101                        | 20991231                      |
| SUL2GEN_GLYB_V2           | 19052954          | Brand Name          | Semi-Daonil                                                     | 225613             | 19700101                        | 20991231                      |
| SUL2GEN_GLYB_V2           | 36234721          | Branded Dose Group  | Calabren Oral Product                                           | 1170866            | 20160801                        | 20991231                      |
| SUL2GEN_GLYB_V2           | 36234722          | Branded Dose Group  | Calabren Pill                                                   | 1170867            | 20160801                        | 20991231                      |
| SUL2GEN_GLYB_V2           | 36230035          | Branded Dose Group  | Diabeta Oral Product                                            | 1175878            | 20160801                        | 20991231                      |

| <b>Broader Drug Class</b> | <b>Concept ID</b> | <b>Class Type</b>  | <b>Trade or Brand Name</b>                      | <b>RX CUI Code</b> | <b>Start Date of Valid Code</b> | <b>End Date of Valid Code</b> |
|---------------------------|-------------------|--------------------|-------------------------------------------------|--------------------|---------------------------------|-------------------------------|
| SUL2GEN_GLYB_V2           | 36230036          | Branded Dose Group | Diabeta Pill                                    | 1175879            | 20160801                        | 20991231                      |
| SUL2GEN_GLYB_V2           | 36230037          | Branded Dose Group | Diabetamide Oral Product                        | 1175880            | 20160801                        | 20991231                      |
| SUL2GEN_GLYB_V2           | 36230038          | Branded Dose Group | Diabetamide Pill                                | 1175881            | 20160801                        | 20991231                      |
| SUL2GEN_GLYB_V2           | 36235405          | Branded Dose Group | Euglucon Oral Product                           | 1171148            | 20160801                        | 20991231                      |
| SUL2GEN_GLYB_V2           | 36235406          | Branded Dose Group | Euglucon Pill                                   | 1171149            | 20160801                        | 20991231                      |
| SUL2GEN_GLYB_V2           | 36233481          | Branded Dose Group | Glyburase Oral Product                          | 1171919            | 20160801                        | 20991231                      |
| SUL2GEN_GLYB_V2           | 36233482          | Branded Dose Group | Glyburase Pill                                  | 1171920            | 20160801                        | 20991231                      |
| SUL2GEN_GLYB_V2           | 36233495          | Branded Dose Group | Glynase Oral Product                            | 1171933            | 20160801                        | 20991231                      |
| SUL2GEN_GLYB_V2           | 36233496          | Branded Dose Group | Glynase Pill                                    | 1171934            | 20160801                        | 20991231                      |
| SUL2GEN_GLYB_V2           | 36240751          | Branded Dose Group | Libanil Oral Product                            | 1186169            | 20160801                        | 20991231                      |
| SUL2GEN_GLYB_V2           | 36240752          | Branded Dose Group | Libanil Pill                                    | 1186170            | 20160801                        | 20991231                      |
| SUL2GEN_GLYB_V2           | 36231233          | Branded Dose Group | Malix Oral Product                              | 1179740            | 20160801                        | 20991231                      |
| SUL2GEN_GLYB_V2           | 36231234          | Branded Dose Group | Malix Pill                                      | 1179741            | 20160801                        | 20991231                      |
| SUL2GEN_GLYB_V2           | 36231169          | Branded Dose Group | Micronase Oral Product                          | 1178082            | 20160801                        | 20991231                      |
| SUL2GEN_GLYB_V2           | 36231170          | Branded Dose Group | Micronase Pill                                  | 1178083            | 20160801                        | 20991231                      |
| SUL2GEN_GLYB_V2           | 36232128          | Branded Dose Group | Semi-Daonil Oral Product                        | 1178368            | 20160801                        | 20991231                      |
| SUL2GEN_GLYB_V2           | 36232129          | Branded Dose Group | Semi-Daonil Pill                                | 1178369            | 20160801                        | 20991231                      |
| SUL2GEN_GLYB_V2           | 19030572          | Branded Drug       | Glyburide 1.25 MG Oral Tablet [Diabeta]         | 205872             | 19700101                        | 20991231                      |
| SUL2GEN_GLYB_V2           | 19125219          | Branded Drug       | Glyburide 1.25 MG Oral Tablet [Glyburase]       | 669983             | 20061217                        | 20991231                      |
| SUL2GEN_GLYB_V2           | 19030573          | Branded Drug       | Glyburide 1.25 MG Oral Tablet [Micronase]       | 205873             | 19700101                        | 20991231                      |
| SUL2GEN_GLYB_V2           | 19067365          | Branded Drug       | Glyburide 1.5 MG Oral Tablet [Glycron]          | 260286             | 19700101                        | 20991231                      |
| SUL2GEN_GLYB_V2           | 40114204          | Branded Drug       | Glyburide 1.5 MG Oral Tablet [Glyguride]        | 541898             | 20050911                        | 20090201                      |
| SUL2GEN_GLYB_V2           | 19030574          | Branded Drug       | Glyburide 1.5 MG Oral Tablet [Glynase Pres-Tab] | 205874             | 19700101                        | 20091205                      |
| SUL2GEN_GLYB_V2           | 40168368          | Branded Drug       | Glyburide 1.5 MG Oral Tablet [Glynase]          | 881407             | 20091206                        | 20991231                      |
| SUL2GEN_GLYB_V2           | 19006908          | Branded Drug       | Glyburide 2.5 MG Oral Tablet [Calabren]         | 105371             | 19700101                        | 20991231                      |
| SUL2GEN_GLYB_V2           | 19030575          | Branded Drug       | Glyburide 2.5 MG Oral Tablet [Diabeta]          | 205875             | 19700101                        | 20991231                      |
| SUL2GEN_GLYB_V2           | 19024506          | Branded Drug       | Glyburide 2.5 MG Oral Tablet [Diabetamide]      | 201060             | 19700101                        | 20991231                      |
| SUL2GEN_GLYB_V2           | 19024504          | Branded Drug       | Glyburide 2.5 MG Oral Tablet [Euglucon]         | 201058             | 19700101                        | 20991231                      |
| SUL2GEN_GLYB_V2           | 19125221          | Branded Drug       | Glyburide 2.5 MG Oral Tablet [Glyburase]        | 669985             | 20061217                        | 20991231                      |
| SUL2GEN_GLYB_V2           | 19024502          | Branded Drug       | Glyburide 2.5 MG Oral Tablet [Libanil]          | 201056             | 19700101                        | 20991231                      |
| SUL2GEN_GLYB_V2           | 19024505          | Branded Drug       | Glyburide 2.5 MG Oral Tablet [Malix]            | 201059             | 19700101                        | 20991231                      |
| SUL2GEN_GLYB_V2           | 19030576          | Branded Drug       | Glyburide 2.5 MG Oral Tablet [Micronase]        | 205876             | 19700101                        | 20991231                      |
| SUL2GEN_GLYB_V2           | 19024503          | Branded Drug       | Glyburide 2.5 MG Oral Tablet [Semi-Daonil]      | 201057             | 19700101                        | 20991231                      |
| SUL2GEN_GLYB_V2           | 1559729           | Branded Drug       | Glyburide 3 MG Oral Tablet [Glycron]            | 261974             | 19700101                        | 20991231                      |
| SUL2GEN_GLYB_V2           | 19030577          | Branded Drug       | Glyburide 3 MG Oral Tablet [Glynase Pres-Tab]   | 205877             | 19700101                        | 20091205                      |
| SUL2GEN_GLYB_V2           | 40168370          | Branded Drug       | Glyburide 3 MG Oral Tablet [Glynase]            | 881409             | 20091206                        | 20991231                      |
| SUL2GEN_GLYB_V2           | 1559728           | Branded Drug       | Glyburide 4.5 MG Oral Tablet [Glycron]          | 261351             | 19700101                        | 20991231                      |
| SUL2GEN_GLYB_V2           | 19006909          | Branded Drug       | Glyburide 5 MG Oral Tablet [Calabren]           | 105372             | 19700101                        | 20991231                      |
| SUL2GEN_GLYB_V2           | 19001408          | Branded Drug       | Glyburide 5 MG Oral Tablet [Daonil]             | 102845             | 19700101                        | 20991231                      |

| <b>Broader Drug Class</b> | <b>Concept ID</b> | <b>Class Type</b> | <b>Trade or Brand Name</b>                    | <b>RX CUI Code</b> | <b>Start Date of Valid Code</b> | <b>End Date of Valid Code</b> |
|---------------------------|-------------------|-------------------|-----------------------------------------------|--------------------|---------------------------------|-------------------------------|
| SUL2GEN_GLYB_V2           | 19030579          | Branded Drug      | Glyburide 5 MG Oral Tablet [Diabeta]          | 205879             | 19700101                        | 20991231                      |
| SUL2GEN_GLYB_V2           | 19024510          | Branded Drug      | Glyburide 5 MG Oral Tablet [Diabetamide]      | 201064             | 19700101                        | 20991231                      |
| SUL2GEN_GLYB_V2           | 19024508          | Branded Drug      | Glyburide 5 MG Oral Tablet [Euglucon]         | 201062             | 19700101                        | 20991231                      |
| SUL2GEN_GLYB_V2           | 19125223          | Branded Drug      | Glyburide 5 MG Oral Tablet [Glyburase]        | 669987             | 20061217                        | 20991231                      |
| SUL2GEN_GLYB_V2           | 19024507          | Branded Drug      | Glyburide 5 MG Oral Tablet [Libanil]          | 201061             | 19700101                        | 20991231                      |
| SUL2GEN_GLYB_V2           | 19024509          | Branded Drug      | Glyburide 5 MG Oral Tablet [Malix]            | 201063             | 19700101                        | 20991231                      |
| SUL2GEN_GLYB_V2           | 19030580          | Branded Drug      | Glyburide 5 MG Oral Tablet [Micronase]        | 205880             | 19700101                        | 20991231                      |
| SUL2GEN_GLYB_V2           | 19067366          | Branded Drug      | Glyburide 6 MG Oral Tablet [Glycron]          | 260287             | 19700101                        | 20991231                      |
| SUL2GEN_GLYB_V2           | 19030601          | Branded Drug      | Glyburide 6 MG Oral Tablet [Glynase Pres-Tab] | 205881             | 19700101                        | 20091205                      |
| SUL2GEN_GLYB_V2           | 40168374          | Branded Drug      | Glyburide 6 MG Oral Tablet [Glynase]          | 881411             | 20091206                        | 20991231                      |
| SUL2GEN_GLYB_V2           | 40114229          | Branded Drug      | Glyburide 6 MG Oral Tablet [Gyburide]         | 542067             | 20050911                        | 20080629                      |
| SUL2GEN_GLYB_V2           | 19045628          | Branded Drug Comp | Glyburide 1.25 MG [Diabeta]                   | 566761             | 20050911                        | 20991231                      |
| SUL2GEN_GLYB_V2           | 19125218          | Branded Drug Comp | Glyburide 1.25 MG [Glyburase]                 | 669981             | 20061217                        | 20991231                      |
| SUL2GEN_GLYB_V2           | 19045624          | Branded Drug Comp | Glyburide 1.25 MG [Micronase]                 | 566762             | 20050911                        | 20991231                      |
| SUL2GEN_GLYB_V2           | 19120562          | Branded Drug Comp | Glyburide 1.5 MG [Glycron]                    | 574089             | 20050911                        | 20991231                      |
| SUL2GEN_GLYB_V2           | 40114206          | Branded Drug Comp | Glyburide 1.5 MG [Glyguride]                  | 541896             | 20050911                        | 20090201                      |
| SUL2GEN_GLYB_V2           | 19067194          | Branded Drug Comp | Glyburide 1.5 MG [Glynase Pres-Tab]           | 566763             | 20050911                        | 20091205                      |
| SUL2GEN_GLYB_V2           | 40168369          | Branded Drug Comp | Glyburide 1.5 MG [Glynase]                    | 881405             | 20091206                        | 20991231                      |
| SUL2GEN_GLYB_V2           | 19116146          | Branded Drug Comp | Glyburide 2.5 MG [Calabren]                   | 564036             | 20050911                        | 20991231                      |
| SUL2GEN_GLYB_V2           | 19045629          | Branded Drug Comp | Glyburide 2.5 MG [Diabeta]                    | 566764             | 20050911                        | 20991231                      |
| SUL2GEN_GLYB_V2           | 19117420          | Branded Drug Comp | Glyburide 2.5 MG [Diabetamide]                | 565671             | 20050911                        | 20991231                      |
| SUL2GEN_GLYB_V2           | 19117418          | Branded Drug Comp | Glyburide 2.5 MG [Euglucon]                   | 565669             | 20050911                        | 20991231                      |
| SUL2GEN_GLYB_V2           | 19125220          | Branded Drug Comp | Glyburide 2.5 MG [Glyburase]                  | 669984             | 20061217                        | 20991231                      |
| SUL2GEN_GLYB_V2           | 19117416          | Branded Drug Comp | Glyburide 2.5 MG [Libanil]                    | 565667             | 20050911                        | 20991231                      |
| SUL2GEN_GLYB_V2           | 19117419          | Branded Drug Comp | Glyburide 2.5 MG [Malix]                      | 565670             | 20050911                        | 20991231                      |
| SUL2GEN_GLYB_V2           | 19045625          | Branded Drug Comp | Glyburide 2.5 MG [Micronase]                  | 566765             | 20050911                        | 20991231                      |
| SUL2GEN_GLYB_V2           | 19117417          | Branded Drug Comp | Glyburide 2.5 MG [Semi-Daonil]                | 565668             | 20050911                        | 20991231                      |
| SUL2GEN_GLYB_V2           | 19099409          | Branded Drug Comp | Glyburide 3 MG [Glycron]                      | 574612             | 20050911                        | 20991231                      |
| SUL2GEN_GLYB_V2           | 19067195          | Branded Drug Comp | Glyburide 3 MG [Glynase Pres-Tab]             | 566766             | 20050911                        | 20091205                      |
| SUL2GEN_GLYB_V2           | 40168371          | Branded Drug Comp | Glyburide 3 MG [Glynase]                      | 881408             | 20091206                        | 20991231                      |
| SUL2GEN_GLYB_V2           | 19099408          | Branded Drug Comp | Glyburide 4.5 MG [Glycron]                    | 574571             | 20050911                        | 20991231                      |
| SUL2GEN_GLYB_V2           | 19116147          | Branded Drug Comp | Glyburide 5 MG [Calabren]                     | 564037             | 20050911                        | 20991231                      |
| SUL2GEN_GLYB_V2           | 19115458          | Branded Drug Comp | Glyburide 5 MG [Daonil]                       | 563154             | 20050911                        | 20991231                      |
| SUL2GEN_GLYB_V2           | 19045630          | Branded Drug Comp | Glyburide 5 MG [Diabeta]                      | 566768             | 20050911                        | 20991231                      |
| SUL2GEN_GLYB_V2           | 19117424          | Branded Drug Comp | Glyburide 5 MG [Diabetamide]                  | 565675             | 20050911                        | 20991231                      |
| SUL2GEN_GLYB_V2           | 19117422          | Branded Drug Comp | Glyburide 5 MG [Euglucon]                     | 565673             | 20050911                        | 20991231                      |
| SUL2GEN_GLYB_V2           | 19125222          | Branded Drug Comp | Glyburide 5 MG [Glyburase]                    | 669986             | 20061217                        | 20991231                      |
| SUL2GEN_GLYB_V2           | 19117421          | Branded Drug Comp | Glyburide 5 MG [Libanil]                      | 565672             | 20050911                        | 20991231                      |
| SUL2GEN_GLYB_V2           | 19117423          | Branded Drug Comp | Glyburide 5 MG [Malix]                        | 565674             | 20050911                        | 20991231                      |

| <b>Broader Drug Class</b> | <b>Concept ID</b> | <b>Class Type</b>   | <b>Trade or Brand Name</b>                      | <b>RX CUI Code</b> | <b>Start Date of Valid Code</b> | <b>End Date of Valid Code</b> |
|---------------------------|-------------------|---------------------|-------------------------------------------------|--------------------|---------------------------------|-------------------------------|
| SUL2GEN_GLYB_V2           | 19045626          | Branded Drug Comp   | Glyburide 5 MG [Micronase]                      | 566769             | 20050911                        | 20991231                      |
| SUL2GEN_GLYB_V2           | 19120563          | Branded Drug Comp   | Glyburide 6 MG [Glycron]                        | 574090             | 20050911                        | 20991231                      |
| SUL2GEN_GLYB_V2           | 19117952          | Branded Drug Comp   | Glyburide 6 MG [Glynase Pres-Tab]               | 566770             | 20050911                        | 20091205                      |
| SUL2GEN_GLYB_V2           | 40168375          | Branded Drug Comp   | Glyburide 6 MG [Glynase]                        | 881410             | 20091206                        | 20991231                      |
| SUL2GEN_GLYB_V2           | 40114232          | Branded Drug Comp   | Glyburide 6 MG [Gyburide]                       | 542065             | 20050911                        | 20080629                      |
| SUL2GEN_GLYB_V2           | 40046202          | Branded Drug Form   | Glyburide Oral Tablet [Calabren]                | 379570             | 19700101                        | 20991231                      |
| SUL2GEN_GLYB_V2           | 40046203          | Branded Drug Form   | Glyburide Oral Tablet [Daonil]                  | 369562             | 19700101                        | 20991231                      |
| SUL2GEN_GLYB_V2           | 40046204          | Branded Drug Form   | Glyburide Oral Tablet [Diabeta]                 | 369373             | 19700101                        | 20991231                      |
| SUL2GEN_GLYB_V2           | 40046205          | Branded Drug Form   | Glyburide Oral Tablet [Diabetamide]             | 379565             | 19700101                        | 20991231                      |
| SUL2GEN_GLYB_V2           | 40046206          | Branded Drug Form   | Glyburide Oral Tablet [Euglucon]                | 379559             | 19700101                        | 20991231                      |
| SUL2GEN_GLYB_V2           | 40136854          | Branded Drug Form   | Glyburide Oral Tablet [Glyburase]               | 669982             | 20061217                        | 20991231                      |
| SUL2GEN_GLYB_V2           | 40046207          | Branded Drug Form   | Glyburide Oral Tablet [Glycron]                 | 368204             | 19700101                        | 20991231                      |
| SUL2GEN_GLYB_V2           | 40114233          | Branded Drug Form   | Glyburide Oral Tablet [Glyguride]               | 541897             | 20050911                        | 20090201                      |
| SUL2GEN_GLYB_V2           | 40046208          | Branded Drug Form   | Glyburide Oral Tablet [Glynase Pres-Tab]        | 369372             | 19700101                        | 20091205                      |
| SUL2GEN_GLYB_V2           | 40168376          | Branded Drug Form   | Glyburide Oral Tablet [Glynase]                 | 881406             | 20091206                        | 20991231                      |
| SUL2GEN_GLYB_V2           | 40114234          | Branded Drug Form   | Glyburide Oral Tablet [Gyburide]                | 542066             | 20050911                        | 20080629                      |
| SUL2GEN_GLYB_V2           | 40046209          | Branded Drug Form   | Glyburide Oral Tablet [Libanil]                 | 379572             | 19700101                        | 20991231                      |
| SUL2GEN_GLYB_V2           | 40046210          | Branded Drug Form   | Glyburide Oral Tablet [Malix]                   | 379568             | 19700101                        | 20991231                      |
| SUL2GEN_GLYB_V2           | 40046211          | Branded Drug Form   | Glyburide Oral Tablet [Micronase]               | 93312              | 19700101                        | 20991231                      |
| SUL2GEN_GLYB_V2           | 40046212          | Branded Drug Form   | Glyburide Oral Tablet [Semi-Daonil]             | 369557             | 19700101                        | 20991231                      |
| SUL2GEN_GLYB_V2           | 36213838          | Clinical Dose Group | Glyburide / Phenformin Oral Product             | 1156198            | 20160801                        | 20991231                      |
| SUL2GEN_GLYB_V2           | 36213839          | Clinical Dose Group | Glyburide / Phenformin Pill                     | 1156199            | 20160801                        | 20991231                      |
| SUL2GEN_GLYB_V2           | 36213840          | Clinical Dose Group | Glyburide Oral Product                          | 1156200            | 20160801                        | 20991231                      |
| SUL2GEN_GLYB_V2           | 36213841          | Clinical Dose Group | Glyburide Pill                                  | 1156201            | 20160801                        | 20991231                      |
| SUL2GEN_GLYB_V2           | 19106976          | Clinical Drug       | Glyburide 1 MG Oral Tablet                      | 430104             | 19700101                        | 20991231                      |
| SUL2GEN_GLYB_V2           | 1559685           | Clinical Drug       | Glyburide 1.25 MG Oral Tablet                   | 197737             | 19700101                        | 20991231                      |
| SUL2GEN_GLYB_V2           | 19079986          | Clinical Drug       | Glyburide 1.5 MG Oral Tablet                    | 314000             | 19700101                        | 20991231                      |
| SUL2GEN_GLYB_V2           | 19106975          | Clinical Drug       | Glyburide 1.75 MG Oral Tablet                   | 430103             | 19700101                        | 20991231                      |
| SUL2GEN_GLYB_V2           | 19060409          | Clinical Drug       | Glyburide 2.5 MG / Phenformin 25 MG Oral Tablet | 246391             | 19700101                        | 20991231                      |
| SUL2GEN_GLYB_V2           | 19077659          | Clinical Drug       | Glyburide 2.5 MG Oral Tablet                    | 310534             | 19700101                        | 20991231                      |
| SUL2GEN_GLYB_V2           | 19077681          | Clinical Drug       | Glyburide 3 MG Oral Tablet                      | 310536             | 19700101                        | 20991231                      |
| SUL2GEN_GLYB_V2           | 19106974          | Clinical Drug       | Glyburide 3.5 MG Oral Tablet                    | 430102             | 19700101                        | 20991231                      |
| SUL2GEN_GLYB_V2           | 19065480          | Clinical Drug       | Glyburide 4.5 MG Oral Tablet                    | 252960             | 19700101                        | 20991231                      |
| SUL2GEN_GLYB_V2           | 19060491          | Clinical Drug       | Glyburide 5 MG / Phenformin 50 MG Oral Tablet   | 246524             | 19700101                        | 20991231                      |
| SUL2GEN_GLYB_V2           | 19077682          | Clinical Drug       | Glyburide 5 MG Oral Tablet                      | 310537             | 19700101                        | 20991231                      |
| SUL2GEN_GLYB_V2           | 19077684          | Clinical Drug       | Glyburide 6 MG Oral Tablet                      | 310539             | 19700101                        | 20991231                      |
| SUL2GEN_GLYB_V2           | 19110154          | Clinical Drug Comp  | Glyburide 1 MG                                  | 440286             | 19700101                        | 20991231                      |
| SUL2GEN_GLYB_V2           | 1559760           | Clinical Drug Comp  | Glyburide 1.25 MG                               | 315987             | 19700101                        | 20991231                      |
| SUL2GEN_GLYB_V2           | 1559761           | Clinical Drug Comp  | Glyburide 1.5 MG                                | 315988             | 19700101                        | 20991231                      |

| <b>Broader Drug Class</b> | <b>Concept ID</b> | <b>Class Type</b>   | <b>Trade or Brand Name</b>                                  | <b>RX CUI Code</b> | <b>Start Date of Valid Code</b> | <b>End Date of Valid Code</b> |
|---------------------------|-------------------|---------------------|-------------------------------------------------------------|--------------------|---------------------------------|-------------------------------|
| SUL2GEN_GLYB_V2           | 19110153          | Clinical Drug Comp  | Glyburide 1.75 MG                                           | 440285             | 19700101                        | 20991231                      |
| SUL2GEN_GLYB_V2           | 1559782           | Clinical Drug Comp  | Glyburide 2.5 MG                                            | 315989             | 19700101                        | 20991231                      |
| SUL2GEN_GLYB_V2           | 19081296          | Clinical Drug Comp  | Glyburide 3 MG                                              | 315990             | 19700101                        | 20991231                      |
| SUL2GEN_GLYB_V2           | 19110155          | Clinical Drug Comp  | Glyburide 3.5 MG                                            | 440287             | 19700101                        | 20991231                      |
| SUL2GEN_GLYB_V2           | 1559786           | Clinical Drug Comp  | Glyburide 4.5 MG                                            | 331496             | 19700101                        | 20991231                      |
| SUL2GEN_GLYB_V2           | 1559784           | Clinical Drug Comp  | Glyburide 5 MG                                              | 315991             | 19700101                        | 20991231                      |
| SUL2GEN_GLYB_V2           | 1559785           | Clinical Drug Comp  | Glyburide 6 MG                                              | 315992             | 19700101                        | 20991231                      |
| SUL2GEN_GLYB_V2           | 40046145          | Clinical Drug Form  | Glyburide / Phenformin Oral Tablet                          | 372334             | 19700101                        | 20991231                      |
| SUL2GEN_GLYB_V2           | 40046201          | Clinical Drug Form  | Glyburide Oral Tablet                                       | 372333             | 19700101                        | 20991231                      |
| SUL2GEN_GLYB_V2           | 1559684           | Ingredient          | Glyburide                                                   | 4815               | 19700101                        | 20991231                      |
| SULTZD_GLIM_PIOG          | 19124662          | Brand Name          | Duetact                                                     | 647208             | 20061217                        | 20991231                      |
| SULTZD_GLIM_PIOG          | 19017143          | Brand Name          | Duetact 30/2                                                | 731460             | 20071230                        | 20130331                      |
| SULTZD_GLIM_PIOG          | 19017141          | Brand Name          | Duetact 30/4                                                | 731454             | 20071230                        | 20130331                      |
| SULTZD_GLIM_PIOG          | 36222784          | Branded Dose Group  | Duetact Oral Product                                        | 1166403            | 20160801                        | 20991231                      |
| SULTZD_GLIM_PIOG          | 36222785          | Branded Dose Group  | Duetact Pill                                                | 1166404            | 20160801                        | 20991231                      |
| SULTZD_GLIM_PIOG          | 40136703          | Branded Drug        | glimepiride 2 MG / pioglitazone 30 MG Oral Tablet [Duetact] | 668556             | 20061217                        | 20080330                      |
| SULTZD_GLIM_PIOG          | 1597796           | Branded Drug        | glimepiride 2 MG / pioglitazone 30 MG Oral Tablet [Duetact] | 731463             | 20071230                        | 20991231                      |
| SULTZD_GLIM_PIOG          | 40136705          | Branded Drug        | glimepiride 4 MG / pioglitazone 30 MG Oral Tablet [Duetact] | 668563             | 20061217                        | 20080330                      |
| SULTZD_GLIM_PIOG          | 1597795           | Branded Drug        | glimepiride 4 MG / pioglitazone 30 MG Oral Tablet [Duetact] | 731457             | 20071230                        | 20991231                      |
| SULTZD_GLIM_PIOG          | 40136704          | Branded Drug Comp   | glimepiride 2 MG / pioglitazone 30 MG [Duetact]             | 668554             | 20061217                        | 20080427                      |
| SULTZD_GLIM_PIOG          | 19017144          | Branded Drug Comp   | glimepiride 2 MG / pioglitazone 30 MG [Duetact]             | 731461             | 20071230                        | 20991231                      |
| SULTZD_GLIM_PIOG          | 40136706          | Branded Drug Comp   | glimepiride 4 MG / pioglitazone 30 MG [Duetact]             | 668562             | 20061217                        | 20080427                      |
| SULTZD_GLIM_PIOG          | 19017142          | Branded Drug Comp   | glimepiride 4 MG / pioglitazone 30 MG [Duetact]             | 731455             | 20071230                        | 20991231                      |
| SULTZD_GLIM_PIOG          | 40143967          | Branded Drug Form   | glimepiride / pioglitazone Oral Tablet [Duetact 30/4]       | 731456             | 20071230                        | 20130331                      |
| SULTZD_GLIM_PIOG          | 40136702          | Branded Drug Form   | glimepiride / pioglitazone Oral Tablet [Duetact]            | 668555             | 20061217                        | 20080727                      |
| SULTZD_GLIM_PIOG          | 40143966          | Branded Drug Form   | glimepiride / pioglitazone Oral Tablet [Duetact]            | 731462             | 20071230                        | 20991231                      |
| SULTZD_GLIM_PIOG          | 36214980          | Clinical Dose Group | glimepiride / pioglitazone Oral Product                     | 1157240            | 20160801                        | 20991231                      |
| SULTZD_GLIM_PIOG          | 36214981          | Clinical Dose Group | glimepiride / pioglitazone Pill                             | 1157241            | 20160801                        | 20991231                      |
| SULTZD_GLIM_PIOG          | 1597781           | Clinical Drug       | glimepiride 2 MG / pioglitazone 30 MG Oral Tablet           | 647237             | 20061008                        | 20991231                      |
| SULTZD_GLIM_PIOG          | 1597792           | Clinical Drug       | glimepiride 4 MG / pioglitazone 30 MG Oral Tablet           | 647239             | 20061008                        | 20991231                      |
| SULTZD_GLIM_PIOG          | 40135391          | Clinical Drug Form  | glimepiride / pioglitazone Oral Tablet                      | 647236             | 20061008                        | 20991231                      |
| SULTZD_GLIM_ROSI          | 19123227          | Brand Name          | Avandaryl                                                   | 607816             | 20060402                        | 20991231                      |
| SULTZD_GLIM_ROSI          | 19048031          | Brand Name          | Avandaryl 4/1                                               | 847713             | 20090503                        | 20130331                      |
| SULTZD_GLIM_ROSI          | 19048009          | Brand Name          | Avandaryl 4/2                                               | 847709             | 20090503                        | 20130331                      |
| SULTZD_GLIM_ROSI          | 19048007          | Brand Name          | Avandaryl 4/4                                               | 847705             | 20090503                        | 20130331                      |
| SULTZD_GLIM_ROSI          | 19048033          | Brand Name          | Avandaryl 8/2                                               | 847717             | 20090503                        | 20130331                      |
| SULTZD_GLIM_ROSI          | 19048035          | Brand Name          | Avandaryl 8/4                                               | 847721             | 20090503                        | 20130331                      |
| SULTZD_GLIM_ROSI          | 36229116          | Branded Dose Group  | Avandaryl Oral Product                                      | 1175658            | 20160801                        | 20991231                      |
| SULTZD_GLIM_ROSI          | 36229117          | Branded Dose Group  | Avandaryl Pill                                              | 1175659            | 20160801                        | 20991231                      |



| <b>Broader Drug Class</b> | <b>Concept ID</b> | <b>Class Type</b>   | <b>Trade or Brand Name</b>                                    | <b>RX CUI Code</b> | <b>Start Date of Valid Code</b> | <b>End Date of Valid Code</b> |
|---------------------------|-------------------|---------------------|---------------------------------------------------------------|--------------------|---------------------------------|-------------------------------|
| SULTZD_GLIM_ROSI          | 40130714          | Branded Drug        | glimepiride 1 MG / rosiglitazone 4 MG Oral Tablet [Avandaryl] | 615212             | 20060402                        | 20090502                      |
| SULTZD_GLIM_ROSI          | 1597799           | Branded Drug        | glimepiride 1 MG / rosiglitazone 4 MG Oral Tablet [Avandaryl] | 847716             | 20090503                        | 20991231                      |
| SULTZD_GLIM_ROSI          | 40130716          | Branded Drug        | glimepiride 2 MG / rosiglitazone 4 MG Oral Tablet [Avandaryl] | 615214             | 20060402                        | 20090502                      |
| SULTZD_GLIM_ROSI          | 1597798           | Branded Drug        | glimepiride 2 MG / rosiglitazone 4 MG Oral Tablet [Avandaryl] | 847712             | 20090503                        | 20991231                      |
| SULTZD_GLIM_ROSI          | 40140170          | Branded Drug        | glimepiride 2 MG / rosiglitazone 8 MG Oral Tablet [Avandaryl] | 706933             | 20070701                        | 20090502                      |
| SULTZD_GLIM_ROSI          | 19135388          | Branded Drug        | glimepiride 2 MG / rosiglitazone 8 MG Oral Tablet [Avandaryl] | 847720             | 20090503                        | 20991231                      |
| SULTZD_GLIM_ROSI          | 40130718          | Branded Drug        | glimepiride 4 MG / rosiglitazone 4 MG Oral Tablet [Avandaryl] | 615919             | 20060402                        | 20090502                      |
| SULTZD_GLIM_ROSI          | 19135386          | Branded Drug        | glimepiride 4 MG / rosiglitazone 4 MG Oral Tablet [Avandaryl] | 847708             | 20090503                        | 20991231                      |
| SULTZD_GLIM_ROSI          | 40140173          | Branded Drug        | glimepiride 4 MG / rosiglitazone 8 MG Oral Tablet [Avandaryl] | 707182             | 20070701                        | 20090502                      |
| SULTZD_GLIM_ROSI          | 1597801           | Branded Drug        | glimepiride 4 MG / rosiglitazone 8 MG Oral Tablet [Avandaryl] | 847724             | 20090503                        | 20991231                      |
| SULTZD_GLIM_ROSI          | 40130715          | Branded Drug Comp   | glimepiride 1 MG / rosiglitazone 4 MG [Avandaryl]             | 615210             | 20060402                        | 20090502                      |
| SULTZD_GLIM_ROSI          | 19048032          | Branded Drug Comp   | glimepiride 1 MG / rosiglitazone 4 MG [Avandaryl]             | 847714             | 20090503                        | 20991231                      |
| SULTZD_GLIM_ROSI          | 40130717          | Branded Drug Comp   | glimepiride 2 MG / rosiglitazone 4 MG [Avandaryl]             | 615213             | 20060402                        | 20090502                      |
| SULTZD_GLIM_ROSI          | 19135387          | Branded Drug Comp   | glimepiride 2 MG / rosiglitazone 4 MG [Avandaryl]             | 847710             | 20090503                        | 20991231                      |
| SULTZD_GLIM_ROSI          | 40140171          | Branded Drug Comp   | glimepiride 2 MG / rosiglitazone 8 MG [Avandaryl]             | 706932             | 20070701                        | 20090502                      |
| SULTZD_GLIM_ROSI          | 19048034          | Branded Drug Comp   | glimepiride 2 MG / rosiglitazone 8 MG [Avandaryl]             | 847718             | 20090503                        | 20991231                      |
| SULTZD_GLIM_ROSI          | 40130719          | Branded Drug Comp   | glimepiride 4 MG / rosiglitazone 4 MG [Avandaryl]             | 615918             | 20060402                        | 20090502                      |
| SULTZD_GLIM_ROSI          | 19135385          | Branded Drug Comp   | glimepiride 4 MG / rosiglitazone 4 MG [Avandaryl]             | 847706             | 20090503                        | 20991231                      |
| SULTZD_GLIM_ROSI          | 40140174          | Branded Drug Comp   | glimepiride 4 MG / rosiglitazone 8 MG [Avandaryl]             | 707181             | 20070701                        | 20090502                      |
| SULTZD_GLIM_ROSI          | 19048036          | Branded Drug Comp   | glimepiride 4 MG / rosiglitazone 8 MG [Avandaryl]             | 847722             | 20090503                        | 20991231                      |
| SULTZD_GLIM_ROSI          | 40159906          | Branded Drug Form   | glimepiride / rosiglitazone Oral Tablet [Avandaryl] 4/1]      | 847715             | 20090503                        | 20130331                      |
| SULTZD_GLIM_ROSI          | 40159907          | Branded Drug Form   | glimepiride / rosiglitazone Oral Tablet [Avandaryl] 4/2]      | 847711             | 20090503                        | 20130331                      |
| SULTZD_GLIM_ROSI          | 40159909          | Branded Drug Form   | glimepiride / rosiglitazone Oral Tablet [Avandaryl] 8/2]      | 847719             | 20090503                        | 20130331                      |
| SULTZD_GLIM_ROSI          | 40159910          | Branded Drug Form   | glimepiride / rosiglitazone Oral Tablet [Avandaryl] 8/4]      | 847723             | 20090503                        | 20130331                      |
| SULTZD_GLIM_ROSI          | 40130713          | Branded Drug Form   | glimepiride / rosiglitazone Oral Tablet [Avandaryl]           | 615211             | 20060402                        | 20090502                      |
| SULTZD_GLIM_ROSI          | 40159908          | Branded Drug Form   | glimepiride / rosiglitazone Oral Tablet [Avandaryl]           | 847707             | 20090503                        | 20991231                      |
| SULTZD_GLIM_ROSI          | 36214982          | Clinical Dose Group | glimepiride / rosiglitazone Oral Product                      | 1157242            | 20160801                        | 20991231                      |
| SULTZD_GLIM_ROSI          | 36214983          | Clinical Dose Group | glimepiride / rosiglitazone Pill                              | 1157243            | 20160801                        | 20991231                      |
| SULTZD_GLIM_ROSI          | 19122366          | Clinical Drug       | glimepiride 1 MG / rosiglitazone 4 MG Oral Tablet             | 602544             | 20060226                        | 20991231                      |
| SULTZD_GLIM_ROSI          | 19122367          | Clinical Drug       | glimepiride 2 MG / rosiglitazone 4 MG Oral Tablet             | 602549             | 20060226                        | 20991231                      |
| SULTZD_GLIM_ROSI          | 19126618          | Clinical Drug       | glimepiride 2 MG / rosiglitazone 8 MG Oral Tablet             | 706895             | 20070701                        | 20991231                      |
| SULTZD_GLIM_ROSI          | 19122368          | Clinical Drug       | glimepiride 4 MG / rosiglitazone 4 MG Oral Tablet             | 602550             | 20060226                        | 20991231                      |
| SULTZD_GLIM_ROSI          | 19126619          | Clinical Drug       | glimepiride 4 MG / rosiglitazone 8 MG Oral Tablet             | 706896             | 20070701                        | 20991231                      |
| SULTZD_GLIM_ROSI          | 40129534          | Clinical Drug Form  | glimepiride / rosiglitazone Oral Tablet                       | 602543             | 20060226                        | 20991231                      |
| TZD_PIOG_V2               | 1525216           | Branded Drug        | pioglitazone 15 MG Oral Tablet [Actos]                        | 261266             | 19700101                        | 20991231                      |
| TZD_PIOG_V2               | 1525217           | Branded Drug        | pioglitazone 30 MG Oral Tablet [Actos]                        | 261267             | 19700101                        | 20991231                      |
| TZD_PIOG_V2               | 1525218           | Branded Drug        | pioglitazone 45 MG Oral Tablet [Actos]                        | 261268             | 19700101                        | 20991231                      |
| TZD_PIOG_V2               | 19099207          | Branded Drug Comp   | pioglitazone 15 MG [Actos]                                    | 574495             | 20050911                        | 20991231                      |
| TZD_PIOG_V2               | 19099208          | Branded Drug Comp   | pioglitazone 30 MG [Actos]                                    | 574496             | 20050911                        | 20991231                      |

| <b>Broader Drug Class</b> | <b>Concept ID</b> | <b>Class Type</b>   | <b>Trade or Brand Name</b>               | <b>RX CUI Code</b> | <b>Start Date of Valid Code</b> | <b>End Date of Valid Code</b> |
|---------------------------|-------------------|---------------------|------------------------------------------|--------------------|---------------------------------|-------------------------------|
| TZD_PIOG_V2               | 19099209          | Branded Drug Comp   | pioglitazone 45 MG [Actos]               | 574497             | 20050911                        | 20991231                      |
| TZD_PIOG_V2               | 40099898          | Branded Drug Form   | pioglitazone Oral Tablet [Actos]         | 368230             | 19700101                        | 20991231                      |
| TZD_PIOG_V2               | 36220120          | Clinical Dose Group | pioglitazone Oral Product                | 1163231            | 20160801                        | 20991231                      |
| TZD_PIOG_V2               | 36220121          | Clinical Dose Group | pioglitazone Pill                        | 1163232            | 20160801                        | 20991231                      |
| TZD_PIOG_V2               | 1525221           | Clinical Drug       | pioglitazone 15 MG Oral Tablet           | 317573             | 19700101                        | 20991231                      |
| TZD_PIOG_V2               | 19079293          | Clinical Drug       | pioglitazone 30 MG Oral Tablet           | 312440             | 19700101                        | 20991231                      |
| TZD_PIOG_V2               | 1525220           | Clinical Drug       | pioglitazone 45 MG Oral Tablet           | 312441             | 19700101                        | 20991231                      |
| TZD_PIOG_V2               | 1525243           | Clinical Drug Comp  | pioglitazone 15 MG                       | 332435             | 19700101                        | 20991231                      |
| TZD_PIOG_V2               | 1525242           | Clinical Drug Comp  | pioglitazone 30 MG                       | 331478             | 19700101                        | 20991231                      |
| TZD_PIOG_V2               | 1525244           | Clinical Drug Comp  | pioglitazone 45 MG                       | 332436             | 19700101                        | 20991231                      |
| TZD_PIOG_V2               | 40099897          | Clinical Drug Form  | pioglitazone Oral Tablet                 | 374606             | 19700101                        | 20991231                      |
| TZD_PIOG_V2               | 1525215           | Ingredient          | pioglitazone                             | 33738              | 19700101                        | 20991231                      |
| TZD_PIOG_V2               | 19066522          | Precise Ingredient  | Pioglitazone hydrochloride               | 259319             | 19700101                        | 20991231                      |
| TZD_ROSIG_V2              | 19099243          | Brand Name          | Avandia                                  | 261455             | 19700101                        | 20991231                      |
| TZD_ROSIG_V2              | 36229365          | Branded Dose Group  | Avandia Oral Product                     | 1175666            | 20160801                        | 20991231                      |
| TZD_ROSIG_V2              | 36229366          | Branded Dose Group  | Avandia Pill                             | 1175667            | 20160801                        | 20991231                      |
| TZD_ROSIG_V2              | 1547505           | Branded Drug        | rosiglitazone 2 MG Oral Tablet [Avandia] | 261241             | 19700101                        | 20991231                      |
| TZD_ROSIG_V2              | 1547506           | Branded Drug        | rosiglitazone 4 MG Oral Tablet [Avandia] | 261242             | 19700101                        | 20991231                      |
| TZD_ROSIG_V2              | 1547507           | Branded Drug        | rosiglitazone 8 MG Oral Tablet [Avandia] | 261243             | 19700101                        | 20991231                      |
| TZD_ROSIG_V2              | 19120648          | Branded Drug Comp   | rosiglitazone 2 MG [Avandia]             | 574470             | 20050911                        | 20991231                      |
| TZD_ROSIG_V2              | 19099245          | Branded Drug Comp   | rosiglitazone 4 MG [Avandia]             | 574471             | 20050911                        | 20991231                      |
| TZD_ROSIG_V2              | 19099246          | Branded Drug Comp   | rosiglitazone 8 MG [Avandia]             | 574472             | 20050911                        | 20991231                      |
| TZD_ROSIG_V2              | 40099633          | Branded Drug Form   | rosiglitazone Oral Tablet [Avandia]      | 368234             | 19700101                        | 20991231                      |
| TZD_ROSIG_V2              | 36227624          | Clinical Dose Group | rosiglitazone Oral Product               | 1157987            | 20160801                        | 20991231                      |
| TZD_ROSIG_V2              | 36227625          | Clinical Dose Group | rosiglitazone Pill                       | 1157988            | 20160801                        | 20991231                      |
| TZD_ROSIG_V2              | 19107077          | Clinical Drug       | rosiglitazone 1 MG Oral Tablet           | 430343             | 19700101                        | 20991231                      |
| TZD_ROSIG_V2              | 1547508           | Clinical Drug       | rosiglitazone 2 MG Oral Tablet           | 312859             | 19700101                        | 20991231                      |
| TZD_ROSIG_V2              | 19079465          | Clinical Drug       | rosiglitazone 4 MG Oral Tablet           | 312860             | 19700101                        | 20991231                      |
| TZD_ROSIG_V2              | 1547510           | Clinical Drug       | rosiglitazone 8 MG Oral Tablet           | 312861             | 19700101                        | 20991231                      |
| TZD_ROSIG_V2              | 19099278          | Clinical Drug Comp  | rosiglitazone 1 MG                       | 358809             | 19700101                        | 20991231                      |
| TZD_ROSIG_V2              | 19099070          | Clinical Drug Comp  | rosiglitazone 2 MG                       | 358530             | 19700101                        | 20991231                      |
| TZD_ROSIG_V2              | 1547554           | Clinical Drug Comp  | rosiglitazone 4 MG                       | 358499             | 19700101                        | 20991231                      |
| TZD_ROSIG_V2              | 19099055          | Clinical Drug Comp  | rosiglitazone 8 MG                       | 358500             | 19700101                        | 20991231                      |
| TZD_ROSIG_V2              | 40099632          | Clinical Drug Form  | rosiglitazone Oral Tablet                | 373801             | 19700101                        | 20991231                      |
| TZD_ROSIG_V2              | 1547504           | Ingredient          | rosiglitazone                            | 84108              | 19700101                        | 20991231                      |
| TZD_ROSIG_V2              | 19065822          | Precise Ingredient  | Rosiglitazone maleate                    | 253198             | 19700101                        | 20991231                      |
| TZD_TROGLITAZONE          | 19047827          | Brand Name          | Rezulin                                  | 203715             | 19700101                        | 20991231                      |
| TZD_TROGLITAZONE          | 19017857          | Brand Name          | Romozin                                  | 153725             | 19700101                        | 20991231                      |
| TZD_TROGLITAZONE          | 36240297          | Branded Dose Group  | Rezulin Oral Product                     | 1183057            | 20160801                        | 20991231                      |

| <b>Broader Drug Class</b> | <b>Concept ID</b> | <b>Class Type</b>   | <b>Trade or Brand Name</b>                                  | <b>RX CUI Code</b> | <b>Start Date of Valid Code</b> | <b>End Date of Valid Code</b> |
|---------------------------|-------------------|---------------------|-------------------------------------------------------------|--------------------|---------------------------------|-------------------------------|
| TZD_TROGLITAZONE          | 36240298          | Branded Dose Group  | Rezulin Pill                                                | 1183058            | 20160801                        | 20991231                      |
| TZD_TROGLITAZONE          | 36230353          | Branded Dose Group  | Romozin Oral Product                                        | 1181933            | 20160801                        | 20991231                      |
| TZD_TROGLITAZONE          | 36230354          | Branded Dose Group  | Romozin Pill                                                | 1181934            | 20160801                        | 20991231                      |
| TZD_TROGLITAZONE          | 1515253           | Branded Drug        | troglitazone 200 MG Oral Tablet [Rezulin]                   | 212281             | 19700101                        | 20991231                      |
| TZD_TROGLITAZONE          | 19017854          | Branded Drug        | troglitazone 200 MG Oral Tablet [Romozin]                   | 153722             | 19700101                        | 20991231                      |
| TZD_TROGLITAZONE          | 19047414          | Branded Drug        | troglitazone 300 MG Oral Tablet [Rezulin]                   | 213041             | 19700101                        | 20991231                      |
| TZD_TROGLITAZONE          | 19017855          | Branded Drug        | troglitazone 300 MG Oral Tablet [Romozin]                   | 153723             | 19700101                        | 20991231                      |
| TZD_TROGLITAZONE          | 1515254           | Branded Drug        | troglitazone 400 MG Oral Tablet [Rezulin]                   | 212282             | 19700101                        | 20991231                      |
| TZD_TROGLITAZONE          | 19017856          | Branded Drug        | troglitazone 400 MG Oral Tablet [Romozin]                   | 153724             | 19700101                        | 20991231                      |
| TZD_TROGLITAZONE          | 19047828          | Branded Drug Comp   | troglitazone 200 MG [Rezulin]                               | 572491             | 20050911                        | 20991231                      |
| TZD_TROGLITAZONE          | 19117169          | Branded Drug Comp   | troglitazone 200 MG [Romozin]                               | 565366             | 20050911                        | 20991231                      |
| TZD_TROGLITAZONE          | 19120166          | Branded Drug Comp   | troglitazone 300 MG [Rezulin]                               | 572980             | 20050911                        | 20991231                      |
| TZD_TROGLITAZONE          | 19117170          | Branded Drug Comp   | troglitazone 300 MG [Romozin]                               | 565367             | 20050911                        | 20991231                      |
| TZD_TROGLITAZONE          | 19047829          | Branded Drug Comp   | troglitazone 400 MG [Rezulin]                               | 572492             | 20050911                        | 20991231                      |
| TZD_TROGLITAZONE          | 19117171          | Branded Drug Comp   | troglitazone 400 MG [Romozin]                               | 565368             | 20050911                        | 20991231                      |
| TZD_TROGLITAZONE          | 40100067          | Branded Drug Form   | troglitazone Oral Tablet [Rezulin]                          | 368317             | 19700101                        | 20991231                      |
| TZD_TROGLITAZONE          | 40100068          | Branded Drug Form   | troglitazone Oral Tablet [Romozin]                          | 386116             | 19700101                        | 20991231                      |
| TZD_TROGLITAZONE          | 36220722          | Clinical Dose Group | troglitazone Oral Product                                   | 1163389            | 20160801                        | 20991231                      |
| TZD_TROGLITAZONE          | 36220723          | Clinical Dose Group | troglitazone Pill                                           | 1163390            | 20160801                        | 20991231                      |
| TZD_TROGLITAZONE          | 1515250           | Clinical Drug       | troglitazone 200 MG Oral Tablet                             | 199984             | 19700101                        | 20991231                      |
| TZD_TROGLITAZONE          | 19022851          | Clinical Drug       | troglitazone 300 MG Oral Tablet                             | 200065             | 19700101                        | 20991231                      |
| TZD_TROGLITAZONE          | 1515251           | Clinical Drug       | troglitazone 400 MG Oral Tablet                             | 199985             | 19700101                        | 20991231                      |
| TZD_TROGLITAZONE          | 1515256           | Clinical Drug Comp  | troglitazone 200 MG                                         | 316869             | 19700101                        | 20991231                      |
| TZD_TROGLITAZONE          | 19082032          | Clinical Drug Comp  | troglitazone 300 MG                                         | 316870             | 19700101                        | 20991231                      |
| TZD_TROGLITAZONE          | 1515258           | Clinical Drug Comp  | troglitazone 400 MG                                         | 316871             | 19700101                        | 20991231                      |
| TZD_TROGLITAZONE          | 40100066          | Clinical Drug Form  | troglitazone Oral Tablet                                    | 374252             | 19700101                        | 20991231                      |
| TZD_TROGLITAZONE          | 1515249           | Ingredient          | troglitazone                                                | 72610              | 19700101                        | 20991231                      |
| TZDDPP_PIOG_ALOG          | 43525503          | Brand Name          | Oseni                                                       | 1372717            | 20130401                        | 20991231                      |
| TZDDPP_PIOG_ALOG          | 43013742          | Brand Name          | Oseni 12.5/15                                               | 1368404            | 20130304                        | 20130331                      |
| TZDDPP_PIOG_ALOG          | 43013743          | Brand Name          | Oseni 12.5/30                                               | 1368411            | 20130304                        | 20130331                      |
| TZDDPP_PIOG_ALOG          | 43013744          | Brand Name          | Oseni 12.5/45                                               | 1368418            | 20130304                        | 20130331                      |
| TZDDPP_PIOG_ALOG          | 43013745          | Brand Name          | Oseni 25/15                                                 | 1368425            | 20130304                        | 20130331                      |
| TZDDPP_PIOG_ALOG          | 43013746          | Brand Name          | Oseni 25/30                                                 | 1368432            | 20130304                        | 20130331                      |
| TZDDPP_PIOG_ALOG          | 43013747          | Brand Name          | Oseni 25/45                                                 | 1368439            | 20130304                        | 20130331                      |
| TZDDPP_PIOG_ALOG          | 36246271          | Branded Dose Group  | Oseni Oral Product                                          | 1368435            | 20160801                        | 20991231                      |
| TZDDPP_PIOG_ALOG          | 36246272          | Branded Dose Group  | Oseni Pill                                                  | 1368436            | 20160801                        | 20991231                      |
| TZDDPP_PIOG_ALOG          | 43013903          | Branded Drug        | alogliptin 12.5 MG / pioglitazone 15 MG Oral Tablet [Oseni] | 1368409            | 20130304                        | 20991231                      |
| TZDDPP_PIOG_ALOG          | 43013906          | Branded Drug        | alogliptin 12.5 MG / pioglitazone 30 MG Oral Tablet [Oseni] | 1368416            | 20130304                        | 20991231                      |
| TZDDPP_PIOG_ALOG          | 43013909          | Branded Drug        | alogliptin 12.5 MG / pioglitazone 45 MG Oral Tablet [Oseni] | 1368423            | 20130304                        | 20991231                      |

| <b>Broader Drug Class</b> | <b>Concept ID</b> | <b>Class Type</b>   | <b>Trade or Brand Name</b>                                | <b>RX CUI Code</b> | <b>Start Date of Valid Code</b> | <b>End Date of Valid Code</b> |
|---------------------------|-------------------|---------------------|-----------------------------------------------------------|--------------------|---------------------------------|-------------------------------|
| TZDDPP_PIOG ALOG          | 43013916          | Branded Drug        | alogliptin 25 MG / pioglitazone 15 MG Oral Tablet [Oseni] | 1368430            | 20130304                        | 20991231                      |
| TZDDPP_PIOG ALOG          | 43013919          | Branded Drug        | alogliptin 25 MG / pioglitazone 30 MG Oral Tablet [Oseni] | 1368437            | 20130304                        | 20991231                      |
| TZDDPP_PIOG ALOG          | 43013922          | Branded Drug        | alogliptin 25 MG / pioglitazone 45 MG Oral Tablet [Oseni] | 1368444            | 20130304                        | 20991231                      |
| TZDDPP_PIOG ALOG          | 43013904          | Branded Drug Comp   | alogliptin 12.5 MG / pioglitazone 15 MG [Oseni]           | 1368405            | 20130304                        | 20991231                      |
| TZDDPP_PIOG ALOG          | 43013907          | Branded Drug Comp   | alogliptin 12.5 MG / pioglitazone 30 MG [Oseni]           | 1368412            | 20130304                        | 20991231                      |
| TZDDPP_PIOG ALOG          | 43013910          | Branded Drug Comp   | alogliptin 12.5 MG / pioglitazone 45 MG [Oseni]           | 1368419            | 20130304                        | 20991231                      |
| TZDDPP_PIOG ALOG          | 43013917          | Branded Drug Comp   | alogliptin 25 MG / pioglitazone 15 MG [Oseni]             | 1368426            | 20130304                        | 20991231                      |
| TZDDPP_PIOG ALOG          | 43013920          | Branded Drug Comp   | alogliptin 25 MG / pioglitazone 30 MG [Oseni]             | 1368433            | 20130304                        | 20991231                      |
| TZDDPP_PIOG ALOG          | 43013923          | Branded Drug Comp   | alogliptin 25 MG / pioglitazone 45 MG [Oseni]             | 1368440            | 20130304                        | 20991231                      |
| TZDDPP_PIOG ALOG          | 43013889          | Branded Drug Form   | alogliptin / pioglitazone Oral Tablet [Oseni 12.5/15]     | 1368406            | 20130304                        | 20130331                      |
| TZDDPP_PIOG ALOG          | 43013890          | Branded Drug Form   | alogliptin / pioglitazone Oral Tablet [Oseni 12.5/30]     | 1368413            | 20130304                        | 20130331                      |
| TZDDPP_PIOG ALOG          | 43013891          | Branded Drug Form   | alogliptin / pioglitazone Oral Tablet [Oseni 12.5/45]     | 1368420            | 20130304                        | 20130331                      |
| TZDDPP_PIOG ALOG          | 43013892          | Branded Drug Form   | alogliptin / pioglitazone Oral Tablet [Oseni 25/15]       | 1368427            | 20130304                        | 20130331                      |
| TZDDPP_PIOG ALOG          | 43013894          | Branded Drug Form   | alogliptin / pioglitazone Oral Tablet [Oseni 25/45]       | 1368441            | 20130304                        | 20130331                      |
| TZDDPP_PIOG ALOG          | 43013893          | Branded Drug Form   | alogliptin / pioglitazone Oral Tablet [Oseni]             | 1368434            | 20130304                        | 20991231                      |
| TZDDPP_PIOG ALOG          | 36246269          | Clinical Dose Group | alogliptin / pioglitazone Oral Product                    | 1368399            | 20160801                        | 20991231                      |
| TZDDPP_PIOG ALOG          | 36246270          | Clinical Dose Group | alogliptin / pioglitazone Pill                            | 1368400            | 20160801                        | 20991231                      |
| TZDDPP_PIOG ALOG          | 43013902          | Clinical Drug       | alogliptin 12.5 MG / pioglitazone 15 MG Oral Tablet       | 1368403            | 20130304                        | 20991231                      |
| TZDDPP_PIOG ALOG          | 43013905          | Clinical Drug       | alogliptin 12.5 MG / pioglitazone 30 MG Oral Tablet       | 1368410            | 20130304                        | 20991231                      |
| TZDDPP_PIOG ALOG          | 43013908          | Clinical Drug       | alogliptin 12.5 MG / pioglitazone 45 MG Oral Tablet       | 1368417            | 20130304                        | 20991231                      |
| TZDDPP_PIOG ALOG          | 43013915          | Clinical Drug       | alogliptin 25 MG / pioglitazone 15 MG Oral Tablet         | 1368424            | 20130304                        | 20991231                      |
| TZDDPP_PIOG ALOG          | 43013918          | Clinical Drug       | alogliptin 25 MG / pioglitazone 30 MG Oral Tablet         | 1368431            | 20130304                        | 20991231                      |
| TZDDPP_PIOG ALOG          | 43013921          | Clinical Drug       | alogliptin 25 MG / pioglitazone 45 MG Oral Tablet         | 1368438            | 20130304                        | 20991231                      |
| TZDDPP_PIOG ALOG          | 43013888          | Clinical Drug Form  | alogliptin / pioglitazone Oral Tablet                     | 1368401            | 20130304                        | 20991231                      |

**Supplemental Table 2. Comorbidities**

| Comorbidities     | ICD9CM                                        | ICD10CM                          | CPT Codes | HCPCS | Generic medications                                                                                                                                                                                                                                                                                                                                                                                                                                                                                                                                                                                                                                                                                  |
|-------------------|-----------------------------------------------|----------------------------------|-----------|-------|------------------------------------------------------------------------------------------------------------------------------------------------------------------------------------------------------------------------------------------------------------------------------------------------------------------------------------------------------------------------------------------------------------------------------------------------------------------------------------------------------------------------------------------------------------------------------------------------------------------------------------------------------------------------------------------------------|
| Hypertension      | 401.*; 402.*; 403*;<br>404.*                  | I10; I11.*; I12.*; I13.*         |           |       |                                                                                                                                                                                                                                                                                                                                                                                                                                                                                                                                                                                                                                                                                                      |
| Lipid disorders   | 272.*                                         | E78.*                            |           |       |                                                                                                                                                                                                                                                                                                                                                                                                                                                                                                                                                                                                                                                                                                      |
| Cancer            |                                               |                                  |           |       |                                                                                                                                                                                                                                                                                                                                                                                                                                                                                                                                                                                                                                                                                                      |
|                   |                                               |                                  |           |       | 140.*; 141.*; 142.*; 143.*; 144.*; 145.*; 146.*; 147.*; 148.*; 149.*; 150.*; 151.*; 152.*; 153.*; 154.*; 155.*; 156.*; 157.*; 158.*; 159.*; 160.*; 161.*; 162.*; 163.*; 164.*; 165.*; 170.*; 171.*; 172.*; 174.*; 175.*; 176.*; 179.*; 180.*; 181.*; 182.*; 183.*; 184.*; 185.*; 186.*; 187.*; 188.*; 189.*; 190.*; 191.*; 192.*; 193.*; 194.*; 195.*; 196.*; 197.*; 198.*; 199.*; 200.*; 201.*; 202.*; 203.*; 204.*; 205.*; 206.*; 207.*; 208.*                                                                                                                                                                                                                                                     |
|                   |                                               |                                  |           |       | C00*; C01*; C02*; C03*; C04*;<br>C05*; C06*; C07*; C08*; C09*;<br>C10*; C11*; C12*; C13*; C14*;<br>C15*; C16*; C17*; C18*; C19*;<br>C20*; C21*; C22*; C23*; C24*;<br>C25*; C26*; C30*; C31*; C32*;<br>C33*; C34*; C37*; C38*; C39*;<br>C40*; C41*; C43*; C44*; C4A*;<br>C45*; C46*; C47*; C48*; C49*;<br>C50*; C51*; C52*; C53*; C54*;<br>C55*; C56*; C57*; C58*; C60*;<br>C61*; C62*; C63*; C64*; C65*;<br>C66*; C67*; C68*; C69*; C70*;<br>C71*; C72*; C73*; C74*; C75*;<br>C7A*; C7B*; C76*; C77*; C78*;<br>C79*; C80*; C81*; C82*; C83*;<br>C84*; C85*; C86*; C88*; C90*;<br>C91*; C92*; C93*; C94*; C95*;<br>C96*; D37*; D38*; D39*; D40*;<br>D41*; D42*; D43*; D44*; D45*;<br>D46*; D47*; D48* |
| Liver disease     | 570*; 571*;<br>572*;<br>573*                  | K72*; K70.*; K73.*; K74.*; K76.* |           |       |                                                                                                                                                                                                                                                                                                                                                                                                                                                                                                                                                                                                                                                                                                      |
| Pulmonary disease | 518.81; 518.83;<br>518.84; 799.1; 415;<br>416 | J96.*; R092; I26.9*;<br>I27.*    |           |       |                                                                                                                                                                                                                                                                                                                                                                                                                                                                                                                                                                                                                                                                                                      |

| Comorbidities            | ICD9CM                                                                                    | ICD10CM                                                                                                                                                                                                                                                                                                                                                                                                                                                                                                                                                                                                                                                                                                                                                                                                                                                             | CPT Codes | HCPCS | Generic medications |
|--------------------------|-------------------------------------------------------------------------------------------|---------------------------------------------------------------------------------------------------------------------------------------------------------------------------------------------------------------------------------------------------------------------------------------------------------------------------------------------------------------------------------------------------------------------------------------------------------------------------------------------------------------------------------------------------------------------------------------------------------------------------------------------------------------------------------------------------------------------------------------------------------------------------------------------------------------------------------------------------------------------|-----------|-------|---------------------|
| Congestive heart failure | 428.*; 402.01;<br>402.11; 402.91;<br>404.01; 404.03;<br>404.11; 404.13;<br>404.91; 404.93 | I11.0; I13.0; I13.2; I50.9; I50.1;<br>I50.20; I50.21; I50.22; I50.23;<br>I50.30; I50.31; I50.32; I50.33;<br>I50.40; I50.41; I50.42; I50.43                                                                                                                                                                                                                                                                                                                                                                                                                                                                                                                                                                                                                                                                                                                          |           |       |                     |
| Retinopathy              | 362.01; 362.02;<br>362.03; 362.04;<br>362.05; 362.06;<br>362.07                           | E08.311; E08.319; E08.3211;<br>E08.3212; E08.3291; E08.3292;<br>E08.3293; E08.3299; E08.3219;<br>E08.3213; E08.3313; E08.3312;<br>E08.3311; E08.3319; E08.3391;<br>E08.3392; E08.3393; E08.3399;<br>E08.3411; E08.3412; E08.3413;<br>E08.3419; E08.3491; E08.3492;<br>E08.3493; E08.3499; E08.3511;<br>E08.3512; E08.3513; E08.3519;<br>E08.3521; E08.3522; E08.3523;<br>E08.3529; E08.3531; E08.3532;<br>E08.3533; E08.3539; E08.3541;<br>E08.3542; E08.3543; E08.3549;<br>E08.3551; E08.3552; E08.3553;<br>E08.3559; E08.3591; E08.3592;<br>E08.3593; E08.3599362.02;<br>E11.311; E11.3491; E11.3492;<br>E11.3493; E11.3499; E11.3591;<br>E11.3592; E11.3593; E11.3599;<br>E11.3591; E11.3592; E11.3593;<br>E11.3599; E11.3291; E11.3292;<br>E11.3293; E11.3299; E11.3391;<br>E11.3392; E11.3393; E11.3399;<br>E11.3491; E11.3492; E11.3493;<br>E11.3499; E11.319 |           |       |                     |

| Comorbidities                                                       | ICD9CM                               | ICD10CM                                                                                                                                                                                                                                                                                                                                                                                                                                                                                                                                                                                                                                                                                                                                                                                                                                           | CPT Codes                                                       | HCPCS | Generic medications |
|---------------------------------------------------------------------|--------------------------------------|---------------------------------------------------------------------------------------------------------------------------------------------------------------------------------------------------------------------------------------------------------------------------------------------------------------------------------------------------------------------------------------------------------------------------------------------------------------------------------------------------------------------------------------------------------------------------------------------------------------------------------------------------------------------------------------------------------------------------------------------------------------------------------------------------------------------------------------------------|-----------------------------------------------------------------|-------|---------------------|
| Stroke                                                              | 430.*; 431.*; 434.*;<br>436.*        | I67.89; I60.9; I61.9; I63.30; I63.40;<br>I63.50; I66.09; I66.19; I66.29;<br>I66.9; I67.89                                                                                                                                                                                                                                                                                                                                                                                                                                                                                                                                                                                                                                                                                                                                                         |                                                                 |       |                     |
| Transient Ischemic<br>Attack                                        | 435.*                                | G45.0; G45.1; G45.8; G45.9;<br>I67.848                                                                                                                                                                                                                                                                                                                                                                                                                                                                                                                                                                                                                                                                                                                                                                                                            |                                                                 |       |                     |
| Carotid<br>revascularization,<br>endarterectomy,<br>stent placement | 38.12; 38.11; 00.61;<br>00.63; 39.28 | 031H0AG; 031H0JG; 031H0KG;<br>031H0ZG; 031J09G; 031J0AG;<br>031J0JG; 031J0KG; 031H09G;<br>031J0ZG; 037H34Z; 037H3DZ;<br>037H3ZZ; 037H44Z; 037H4DZ;<br>037H4ZZ; 037J3DZ; 037J3ZZ;<br>037J44Z; 037J4DZ; 037J4ZZ;<br>037K34Z; 037K3DZ; 037K3ZZ;<br>037K4DZ; 037K4ZZ; 037L34Z;<br>037L3DZ; 037L3ZZ; 037L44Z;<br>037L4DZ; 037L4ZZ; 037M34Z;<br>037M3DZ; 037M3ZZ; 037M44Z;<br>037M4DZ; 037M4ZZ; 037N34Z;<br>037N3DZ; 037N3ZZ; 037N44Z;<br>037N4DZ; 037N4ZZ; 037P34Z;<br>037P3DZ; 037P3ZZ; 037P44Z;<br>037P4DZ; 037P4ZZ; 037Q34Z;<br>037Q3DZ; 037Q3ZZ; 037Q44Z;<br>037Q4DZ; 037Q4ZZ; 03CH0ZZ;<br>03CH3ZZ; 03CH4ZZ; 03CJ0ZZ;<br>03CJ3ZZ; 03CJ4ZZ; 03CK0ZZ;<br>03CK3ZZ; 03CK4ZZ; 03CL0ZZ;<br>03CL3ZZ; 03CL4ZZ; 03CM0ZZ;<br>03CM3ZZ; 03CM4ZZ; 037J34Z;<br>03CN0ZZ; 03CN3ZZ; 03CN4ZZ;<br>03CP0ZZ; 03CP3ZZ; 037K44Z;<br>03CP4ZZ; 03CQ0ZZ; 03CQ3ZZ;<br>03CQ4ZZ | 35301; 0005T;<br>0006T; 0007T;<br>0075T; 0076T;<br>37215; 37216 | S2211 |                     |

| Comorbidities                  | ICD9CM                                                     | ICD10CM                                                                                                                                                                                 | CPT Codes | HCPCS | Generic medications                                                                                                                                                                                                                                                                                                          |
|--------------------------------|------------------------------------------------------------|-----------------------------------------------------------------------------------------------------------------------------------------------------------------------------------------|-----------|-------|------------------------------------------------------------------------------------------------------------------------------------------------------------------------------------------------------------------------------------------------------------------------------------------------------------------------------|
| Cardiac valve disease          | 394*; 395*; 396*;<br>424; 424.1                            | I05.*; I06.*; I08.*; I34.*; I35.*                                                                                                                                                       |           |       |                                                                                                                                                                                                                                                                                                                              |
| Arrhythmia / conduction        | 426.*; 427.*                                               | I44.*; I45.*; I47.*; I49.*                                                                                                                                                              |           |       |                                                                                                                                                                                                                                                                                                                              |
| Atrial fibrillation            | 427.3*                                                     | I48.91; I48.92                                                                                                                                                                          |           |       |                                                                                                                                                                                                                                                                                                                              |
| COPD/Emphysema/Asthma          | 491.*; 492*; 493.*;<br>496*; V17.5; V81.3                  | J41.0; J41.1; J44.9; J44.1; J44.0;<br>J41.8; J42; J43; J43.0; J43.1; J43.2;<br>J43.8; J43.9; J45.20; J45.22; J45.21;<br>J45.990; J45.991; J45.909; J45.998;<br>J45.902; J45.901; Z13.83 |           |       |                                                                                                                                                                                                                                                                                                                              |
| Oxygen therapy                 | V46.2                                                      | Z99.81                                                                                                                                                                                  |           |       |                                                                                                                                                                                                                                                                                                                              |
| Dementia                       | 290.*; 291.2;<br>292.82; 294.1*;<br>331.1*; 331.82         | F03.9; F01.5*; F10.27; F19.97;<br>F02.80; F02.81; G30.9; G31.*                                                                                                                          |           |       | Ambenonium cl; Bethanechol Chloride;<br>Metoclopramide hcl; Neostigmine;<br>Physostigmine; Pyridostigmine; Atomoxetine; Ca<br>Gluconate; Ergoloid; donepezil; rivastigmine;<br>galantamine; Hyoscyamus/camphor/pass tacrine<br>or Memantine; Namenda titration; Pimozide;<br>Pregabalin; Riluzole; Sodium Oxybate; Strattera |
| Schizophrenia                  | 295.*                                                      | F20.*                                                                                                                                                                                   |           |       |                                                                                                                                                                                                                                                                                                                              |
| Bipolar disorder               | 296; 296.4*;<br>296.5*; 296.6*;<br>296.7; 296.8;<br>296.89 | F30.* ; F31.*                                                                                                                                                                           |           |       |                                                                                                                                                                                                                                                                                                                              |
| Post-traumatic stress disorder | 309.81                                                     | F43.10; F43.12                                                                                                                                                                          |           |       | Apokyn; Apomorphine; Carbidopa/levodopa;<br>Entacapone; Pergolide; Pramipexole; Ropinirole;<br>Rotigotine; selegiline; Tolcapone;<br>ZelaparAzilect/rasagiline; Emsam; Isocarboxazid;<br>Phenelzine; Tranylcypromine                                                                                                         |
| Depression                     | 311; 300.4; 296.2;<br>296.3; V79.0                         | F33.9; F34.1; F32.*                                                                                                                                                                     |           |       |                                                                                                                                                                                                                                                                                                                              |



| Comorbidities | ICD9CM | ICD10CM    | CPT Codes | HCPCS | Generic medications |
|---------------|--------|------------|-----------|-------|---------------------|
| Parkinson's   | 332    | G20; G21.* |           |       |                     |

Coronary artery  
disease (angina,  
coronary  
revascularization)

411.\*; 412\*;  
413.\*;  
414.\*; 429.7

I24.\*; I25.\*; I20.\*

33530; 92984;  
92974; 33533;  
33534; 33535;  
33536; 33510;  
33511; 33512;  
33513; 33514;  
33516; 33517;  
33518; 33519;  
33521; 33522;  
33523; 92980;  
92981; 92982;  
92995; 92996

36.01;  
36.02;  
36.03;  
36.05;  
36.09;  
36.10;  
36.11;  
36.12;  
36.13;  
36.14;  
36.15;  
36.16;  
36.17;  
36.18;  
36.19

| Comorbidities | ICD9CM | ICD10CM | CPT Codes | HCPCS | Generic medications |
|---------------|--------|---------|-----------|-------|---------------------|
|---------------|--------|---------|-----------|-------|---------------------|

|                            |                |                                    |               |        |  |
|----------------------------|----------------|------------------------------------|---------------|--------|--|
|                            |                |                                    | 35226; 35256; |        |  |
|                            |                |                                    | 35286; 35351; | 38.08; |  |
|                            |                |                                    | 35355; 35371; | 38.09; |  |
|                            |                |                                    | 35372; 35381; | 38.18; |  |
|                            |                |                                    | 35454; 35456; | 38.38; |  |
|                            |                |                                    | 35459; 35473; | 38.39; |  |
|                            |                |                                    | 35474; 35482; | 38.48; |  |
|                            |                |                                    | 35483; 35485; | 38.49; |  |
|                            |                |                                    | 35492; 35493; | 38.88; |  |
|                            |                |                                    | 35495; 35546; | 38.89; |  |
| Peripheral artery disease, | 440.2*; 442.2; |                                    | 35548; 35549; | 39.25; |  |
| revascularization,         | 443.1; 443.9;  | 170.2*; 172.*; 177.*; 173.9; 175.* | 35551; 35556; | 39.29; |  |
| peripheral                 | 445.0*         |                                    | 35558; 35563; | 39.5;  |  |
| vasodilators               |                |                                    | 35565; 35566; | 84.1*; |  |
|                            |                |                                    | 35571; 35583; | 84.10; |  |
|                            |                |                                    | 35585; 35587; | 84.11; |  |
|                            |                |                                    | 35646; 35651; | 84.12; |  |
|                            |                |                                    | 35654; 35656; | 84.13; |  |
|                            |                |                                    | 35661; 35663; | 84.14; |  |
|                            |                |                                    | 35665; 35666; | 84.15; |  |
|                            |                |                                    | 35671; 34800; | 84.16; |  |
|                            |                |                                    | 34802; 34803; | 84.17  |  |
|                            |                |                                    | 34804; 34805  |        |  |







**Supplemental Table 3. Non-T2D Medication Agents and Pharmacologic Classes**

| <b>Medication class</b>                  | <b>Generic and trade names</b>                                                                                                                                                                                                                                                                                                                                                                                                                                                                                                    |
|------------------------------------------|-----------------------------------------------------------------------------------------------------------------------------------------------------------------------------------------------------------------------------------------------------------------------------------------------------------------------------------------------------------------------------------------------------------------------------------------------------------------------------------------------------------------------------------|
| ACE Inhibitors or ARBs alone/combination | benazepril, captopril, enalapril, fosinopril, lisinopril , moexipril , perindopril , quinapril, ramipril,trandolapril, candesartan, eprosartan , irbesartan , azilsartan , losartan , olmesartan , telmisartan, valsartan                                                                                                                                                                                                                                                                                                         |
| Anti-arrhythmics                         | adenosine, amiodarone, lidocaine, flecainide, ibutilide, pacerone, procainamide, rhythmol, propafenone, quinidine, disopyramide, verapamil, dofetilide, mexiletine, moricizine, tocainide                                                                                                                                                                                                                                                                                                                                         |
| Anticoagulants                           | warfarin, argatroban, bivalirudin, dalteparin, enoxaparin, eptifibatide, fondaparinux, heparin, lepirudin, tirofiban, tinzaparin, reviparin, nadroparin, ardeparin, certoparin                                                                                                                                                                                                                                                                                                                                                    |
| Antipsychotic medications                | lithium, clozapine, haloperidol, loxapine, lurasidone, molindone, abilify, antipsychotics (other), olanzapine/olanzpine, paliperidone, quetiapin fumarat/quetiapine fumarate, risperdal/risperdol, risperidone, aripiprazole, asenapine, fazaclo, geodon, ziprasidone, zyprexa, iloperidone, invega, acetophenazine, chlorpromazine, chlorprothixene, fluphenazine, fluphenazine deconoate, mesoridazine, methotrimeprazine, perphenazine, piperacetazine, promazine, thioridazine, thiothixene, trifluoperazine, triflupromazine |
| Aspirin                                  | aspirin , aspirin/ dipyridamole                                                                                                                                                                                                                                                                                                                                                                                                                                                                                                   |
| Beta-blockers                            | acebutolol , atenolol , betaxolol , bisoprolol , brevibloc , carteolol , carvedilol , coreg , esmolol , labetalol , metoprolol tartrate, metoprolol succinate, propranolol, penbutolol , pindolol nadolol , nebivolol , sotalol , timolol                                                                                                                                                                                                                                                                                         |
| Bone Resorption Inhibitors               | alendronate, denosumab, etidronate, ibandronate, pamidronate, risedronate, zoledronic acid, calcitonin, raloxifene, teriparatide                                                                                                                                                                                                                                                                                                                                                                                                  |
| Calcium Channel Blockers                 | afeditab, amlodipine, clevidipine butyrate , isradipine, felodipine, mibefradil dihydrochloride, nifedipine , nifedipine , nicardipine , diltiazem, verapamil , verapacovera nimodipine , nisoldipine , bepridil                                                                                                                                                                                                                                                                                                                  |
| Digoxin                                  | digitalis , digitoxin , digoxin                                                                                                                                                                                                                                                                                                                                                                                                                                                                                                   |
| Lipid lowering drugs: Non-statins        | cholestyramine, colesvelam, clofibrate, colestipol, niacin, niacinamide, fish oil concentrate, omega 3 fatty acids, omacor, gemfibrozil, tricor/fenofibrate, fenofibric acid, probucol, ezetimibe, vytorin                                                                                                                                                                                                                                                                                                                        |
| Lipid lowering drugs: Statins            | altoprev, atorvastatin, cerivastatin, dextrothyroxine na, fluvastatin, lovastatin, pitavastatin, pravastatin, zocor/simvastatin, crestor/rosuvastatin, zetia/ezetamibe/simvastatin, lovastatin/niacin                                                                                                                                                                                                                                                                                                                             |
| Loop Diuretics                           | furosemide, ethacrynic acid, bumetanide, torsemide                                                                                                                                                                                                                                                                                                                                                                                                                                                                                |
| Nitrates                                 | amyl nitrite, erythryl tetranitrate, isosorbide dinitrate, isosorbide mononitrate, nitroglycerin (sa, patch, sl, aerosol spray), pentaerthritol tetranitrate, ranolazine                                                                                                                                                                                                                                                                                                                                                          |

|                                                                       |                                                                                                                                                                                                                                                                                                                                                                   |
|-----------------------------------------------------------------------|-------------------------------------------------------------------------------------------------------------------------------------------------------------------------------------------------------------------------------------------------------------------------------------------------------------------------------------------------------------------|
| Non Selective Alpha Blockers                                          | alfuzosin, doxazosin, hytrin, prazosin, terazosin, silodosin, uroxatral                                                                                                                                                                                                                                                                                           |
| Oral glucocorticoids                                                  | budesonide, cortisone, entocort, hydrocortisone, paramethasone, fludrocortisone, prednisone, prednisolone, methylprednisolone, triamcinolone, dexamethasone, bethamethasone                                                                                                                                                                                       |
| Other Antihypertensives                                               | clonidine, diazoxide, guanabenz, cryptenamine, deserpidine, guanethidine, guanfacine, hydralazine, iloprost, mecamylamine, methyldopa, metyrosine, reserpine, minoxidil, pargyline, rauwolfia serpentine, rescinnamine, trimethaphan camsylate, vantivis, aldomet                                                                                                 |
| Peripheral Vasodilators                                               | pentoxifylline, cilostazol, cyclandelate, ethaverine hcl, nicotinyl alcohol tartate, papaverine, tolazolin                                                                                                                                                                                                                                                        |
| Platelet inhibitors, not aspirin                                      | abciximab, clopidogrel, ticlopidine or ticlid, aspirin/ dipyridamole, dipyridamole alone, factor ix, factor viia, factor viii, novoseven, aryoseven, prasugrel, ticagrelor                                                                                                                                                                                        |
| Potassium sparing diuretics (including Thiazide) alone or combination | bendroflumethiazide, benzthiazide , chlorothiazide , chlorthalidone, cyclothiazide, hydrochlorothiazide/hctz, hydroflumethiazide, methyclothiazide, trichlormethiazide , metolazone, indapamide , polythiazide, quinethazone, eplerenone, inspra , amiloride , spironolactone, triamterene, hydrochlorothiazide/triamterene<br>hydrochlorothiazide/spironolactone |
